# Supplementary material for: Hiding in Plain Sight: The Globally Distributed Bacterial Candidate Phylum PAUC34f
Source: Front Microbiol. 2020 Mar 12;11:376. doi: 10.3389/fmicb.2020.00376 (PMC7081726; doi:10.3389/fmicb.2020.00376)
Supplement: Supplementary file 5 [file Table_5.XLSX]

## Sheet: Dark ocean abundance (summary)
Supporting Information Table S5:	Relative abundances of bacterial and archaeal phyla in the dark ocean (200-9696 m depth). As described in Pachiadaki, et al. (2017), cells were sorted from various locations around the globe and used to produce SAGs, which were then identified through 16S sequencing. The relative abundance of each phylum was calculated by dividing the number of SAGs in that phylum with the total number of SAGs in…
Phylum	number of SAGs	relative abundance	rank	rank among bacteria
Proteobacteria	1443	55.2028	1	1
Thaumarchaeota	488	18.6687	2
Chloroflexi	133	5.08799	3	2
Bacteroidetes	109	4.16985	4	3
Verrucomicrobia	91	3.48125	5	4
SAR406 clade(Marine group A)	75	2.86917	6	5
Euryarchaeota	74	2.83091	7
Acidobacteria	67	2.56312	8	6
Planctomycetes	55	2.10406	9	7
Gemmatimonadetes	29	1.10941	10	8
PAUC34f	19	0.726855	11	9
Actinobacteria	11	0.420811	12	10
Lentisphaerae	6	0.229533	13	11
Nitrospirae	5	0.191278	14	12
Cyanobacteria	3	0.114767	15	13
Halanaerobiales phylum incertae sedis	2	0.0765111	16	14
Candidate Division Caldithrix	1	0.0382555	17	15
Deinococcus-Thermus	1	0.0382555	18	16
Firmicutes	1	0.0382555	19	17
Spirochaetes	1	0.0382555	20	18
Total SAGs	2614

## Sheet: 16S taxonomic assignments
SAGid	Kingdom	Phylum	Class	Order	Family	Genus
AAA001_I23_Cp_00_bact_AIW_800m_SA_all_seq	Bacteria	PAUC34f
AAA007_E17_Cp_13.2_bact_AIW_800m_SA_HNA	Bacteria	PAUC34f
AAA007_I18_Cp_14.1_bact_AIW_800m_SA_HNA	Bacteria	PAUC34f
AAA007_K08_Cp_7.3_bact_AIW_800m_SA_HNA_seq	Bacteria	PAUC34f
AAA240_O11_Cp_13.4_bact_AAIW_770m_HOT_HNA	Bacteria	PAUC34f
AAA007_L10_Cp_10.5_bact_AIW_800m_SA_HNA	Bacteria	Gemmatimonadetes	Gemmatimonadetes (class)	PAUC43f marine benthic group
AAA001_G18_Cp_00_bact_AIW_800m_SA_all	Bacteria	Gemmatimonadetes	Gemmatimonadetes (class)	BD2-11 terrestrial group
AAA003_K10_Cp_00_bact_AIW_800m_SA_all_seq	Bacteria	Gemmatimonadetes	Gemmatimonadetes (class)	BD2-11 terrestrial group
AAA007_G08_Cp_10.8_bact_AIW_800m_SA_HNA	Bacteria	Gemmatimonadetes	Gemmatimonadetes (class)	BD2-11 terrestrial group
AAA007_L19_Cp_10.7_bact_AIW_800m_SA_HNA_seq	Bacteria	Gemmatimonadetes	Gemmatimonadetes (class)	BD2-11 terrestrial group
AAA007_O06_Cp_12.2_bact_AIW_800m_SA_HNA	Bacteria	Gemmatimonadetes	Gemmatimonadetes (class)	BD2-11 terrestrial group
AAA007_O21_Cp_10.9_bact_AIW_800m_SA_HNA_seq	Bacteria	Gemmatimonadetes	Gemmatimonadetes (class)	BD2-11 terrestrial group
AAA240_A23_Cp_14.1_bact_AAIW_770m_HOT_HNA	Bacteria	Gemmatimonadetes	Gemmatimonadetes (class)	BD2-11 terrestrial group
AAA240_G19_Cp_11.5_bact_AAIW_770m_HOT_HNA	Bacteria	Gemmatimonadetes	Gemmatimonadetes (class)	BD2-11 terrestrial group
AAA240_J22_Cp_9.3_bact_AAIW_770m_HOT_HNA_seq	Bacteria	Gemmatimonadetes	Gemmatimonadetes (class)	BD2-11 terrestrial group
AAA240_K19_Cp_10.1_bact_AAIW_770m_HOT_HNA	Bacteria	Gemmatimonadetes	Gemmatimonadetes (class)	BD2-11 terrestrial group
AAA240_L08_Cp_14.1_bact_AAIW_770m_HOT_HNA	Bacteria	Gemmatimonadetes	Gemmatimonadetes (class)	BD2-11 terrestrial group
AAA240_M10_Cp_10.5_bact_AAIW_770m_HOT_HNA	Bacteria	Gemmatimonadetes	Gemmatimonadetes (class)	BD2-11 terrestrial group
AAA240_N07_Cp_11.6_bact_AAIW_770m_HOT_HNA	Bacteria	Gemmatimonadetes	Gemmatimonadetes (class)	BD2-11 terrestrial group
AAA240_N17_Cp_11.7_bact_AAIW_770m_HOT_HNA	Bacteria	Gemmatimonadetes	Gemmatimonadetes (class)	BD2-11 terrestrial group
AAA242_K13_Cp_11.8_bact_NPBW_4800m_HOT_HNA	Bacteria	Gemmatimonadetes	Gemmatimonadetes (class)	BD2-11 terrestrial group
AAA286_F19_Cp_9.8_bact_NPDW_3000m_HOT_LNA	Bacteria	Lentisphaerae	Lentisphaeria	Lentisphaerales	Lentisphaeraceae	Lentisphaera
AAA283_D08_Cp_10.2_bact_NPBW_4800m_HOT_LNA_seq	Bacteria	Lentisphaerae	Lentisphaeria	Lentisphaerales	Lentisphaeraceae	Unknown Lentisphaeraceae genus
AAA003_E22_Cp_00_bact_AIW_800m_SA_all_seq	Bacteria	SAR406 clade(Marine group A)
AAA003_L08_Cp_00_bact_AIW_800m_SA_all_seq	Bacteria	SAR406 clade(Marine group A)
AAA007_A19_Cp_6.4_bact_AIW_800m_SA_HNA_seq	Bacteria	SAR406 clade(Marine group A)
AAA007_B04_Cp_10.1_bact_AIW_800m_SA_HNA	Bacteria	SAR406 clade(Marine group A)
AAA007_D16_Cp_7.4_bact_AIW_800m_SA_HNA_seq	Bacteria	SAR406 clade(Marine group A)
AAA240_B05_Cp_7.4_bact_AAIW_770m_HOT_HNA	Bacteria	SAR406 clade(Marine group A)
AAA240_E11_Cp_7.8_bact_AAIW_770m_HOT_HNA_seq	Bacteria	SAR406 clade(Marine group A)
AAA240_I10_Cp_7.3_bact_AAIW_770m_HOT_HNA_seq	Bacteria	SAR406 clade(Marine group A)
AAA240_L11_Cp_5.5_bact_AAIW_770m_HOT_HNA	Bacteria	SAR406 clade(Marine group A)
AAA240_O14_Cp_6.4_bact_AAIW_770m_HOT_HNA_seq	Bacteria	SAR406 clade(Marine group A)
AAA240_P10_Cp_6.2_bact_AAIW_770m_HOT_HNA_seq	Bacteria	SAR406 clade(Marine group A)
AAA242_G02_Cp_13.2_bact_NPBW_4800m_HOT_HNA	Bacteria	SAR406 clade(Marine group A)
AAA286_K15_Cp_12.6_bact_NPDW_3000m_HOT_LNA	Bacteria	SAR406 clade(Marine group A)
AAA003_F02_Cp_00_bact_AIW_800m_SA_all	Bacteria	Verrucomicrobia	Arctic97B-4 marine group
AAA007_A11_Cp_11.3_bact_AIW_800m_SA_HNA	Bacteria	Verrucomicrobia	Arctic97B-4 marine group
AAA007_C02_Cp_8.7_bact_AIW_800m_SA_HNA	Bacteria	Verrucomicrobia	Arctic97B-4 marine group
AAA007_C05_Cp_11.0_bact_AIW_800m_SA_HNA	Bacteria	Verrucomicrobia	Arctic97B-4 marine group
AAA007_C23_Cp_9.9_bact_AIW_800m_SA_HNA	Bacteria	Verrucomicrobia	Arctic97B-4 marine group
AAA007_L17_Cp_10.8_bact_AIW_800m_SA_HNA	Bacteria	Verrucomicrobia	Arctic97B-4 marine group
AAA240_D03_Cp_10.1_bact_AAIW_770m_HOT_HNA	Bacteria	Verrucomicrobia	Arctic97B-4 marine group
AAA240_D15_Cp_10.1_bact_AAIW_770m_HOT_HNA	Bacteria	Verrucomicrobia	Arctic97B-4 marine group
AAA240_D21_Cp_9.7_bact_AAIW_770m_HOT_HNA	Bacteria	Verrucomicrobia	Arctic97B-4 marine group
AAA240_E08_Cp_9.4_bact_AAIW_770m_HOT_HNA	Bacteria	Verrucomicrobia	Arctic97B-4 marine group
AAA240_E17_Cp_12.1_bact_AAIW_770m_HOT_HNA	Bacteria	Verrucomicrobia	Arctic97B-4 marine group
AAA240_F09_Cp_9.7_bact_AAIW_770m_HOT_HNA	Bacteria	Verrucomicrobia	Arctic97B-4 marine group
AAA240_L02_Cp_9.3_bact_AAIW_770m_HOT_HNA	Bacteria	Verrucomicrobia	Arctic97B-4 marine group
AAA240_N22_Cp_9.0_bact_AAIW_770m_HOT_HNA	Bacteria	Verrucomicrobia	Arctic97B-4 marine group
AAA240_O04_Cp_13.2_bact_AAIW_770m_HOT_HNA	Bacteria	Verrucomicrobia	Arctic97B-4 marine group
AAA242_A13_Cp_7.1_bact_NPBW_4800m_HOT_HNA	Bacteria	Verrucomicrobia	Arctic97B-4 marine group
AAA242_J03_Cp_9.9_bact_NPBW_4800m_HOT_HNA	Bacteria	Verrucomicrobia	Arctic97B-4 marine group
AAA282_P22_Cp_8.5_bact_NPBW_4800m_HOT_LNA	Bacteria	Verrucomicrobia	Arctic97B-4 marine group
AAA283_J04_Cp_12.8_bact_NPBW_4800m_HOT_LNA	Bacteria	Verrucomicrobia	Arctic97B-4 marine group
AAA283_M17_Cp_9.9_bact_NPBW_4800m_HOT_LNA	Bacteria	Verrucomicrobia	Arctic97B-4 marine group
AAA284_F06_Cp_15.2_bact_NPDW_3000m_HOT_HNA	Bacteria	Verrucomicrobia	Arctic97B-4 marine group
AAA001_J14_Cp_00_bact_AIW_800m_SA_all	Bacteria	Verrucomicrobia	Verrucomicrobiae	Verrucomicrobiales	DEV007
AAA007_E20_Cp_12.8_bact_AIW_800m_SA_HNA	Bacteria	Verrucomicrobia	Verrucomicrobiae	Verrucomicrobiales	Rubritaleaceae	Roseibacillus
AAA240_M19_Cp_7.7_bact_AAIW_770m_HOT_HNA	Bacteria	Verrucomicrobia	Opitutae
AAA007_F06_Cp_14.1_bact_AIW_800m_SA_HNA	Bacteria	Verrucomicrobia	Opitutae	A714019
AAA007_J17_Cp_11.7_bact_AIW_800m_SA_HNA	Bacteria	Verrucomicrobia	Opitutae	Puniceicoccales	Puniceicoccaceae	marine group (Puniceicoccaceae)
AAA283_A03_Cp_8.2_bact_NPBW_4800m_HOT_LNA	Bacteria	Verrucomicrobia	Opitutae	Puniceicoccales	Puniceicoccaceae	marine group (Puniceicoccaceae)
AAA240_C14_Cp_9.4_bact_AAIW_770m_HOT_HNA	Bacteria	Verrucomicrobia	Opitutae	Puniceicoccales	Puniceicoccaceae	Cerasicoccus
AAA240_J08_Cp_14.1_bact_AAIW_770m_HOT_HNA	Bacteria	Verrucomicrobia	Opitutae	MB11C04 marine group
AAA242_O13_Cp_9.7_bact_NPBW_4800m_HOT_HNA	Bacteria	Verrucomicrobia	Opitutae	Unknown Opitutae order
AAA001_B19_Cp_00_bact_AIW_800m_SA_all	Bacteria	Actinobacteria	Acidimicrobiia	Acidimicrobiales	Sva0996 marine group
AAA001_F21_Cp_00_bact_AIW_800m_SA_all	Bacteria	Actinobacteria	Acidimicrobiia	Acidimicrobiales	Sva0996 marine group
AAA001_I13_Cp_00_bact_AIW_800m_SA_all	Bacteria	Actinobacteria	Acidimicrobiia	Acidimicrobiales	Sva0996 marine group
AAA001_I21_Cp_00_bact_AIW_800m_SA_all	Bacteria	Actinobacteria	Acidimicrobiia	Acidimicrobiales	Sva0996 marine group
AAA003_F21_Cp_00_bact_AIW_800m_SA_all	Bacteria	Actinobacteria	Acidimicrobiia	Acidimicrobiales	Sva0996 marine group
AAA003_L19_Cp_00_bact_AIW_800m_SA_all	Bacteria	Actinobacteria	Acidimicrobiia	Acidimicrobiales	Sva0996 marine group
AAA003_N08_Cp_00_bact_AIW_800m_SA_all	Bacteria	Actinobacteria	Acidimicrobiia	Acidimicrobiales	Sva0996 marine group
AAA007_J07_Cp_12.4_bact_AIW_800m_SA_HNA_seq	Bacteria	Actinobacteria	Acidimicrobiia	Acidimicrobiales	Sva0996 marine group
AAA240_A06_Cp_12.3_bact_AAIW_770m_HOT_HNA	Bacteria	Bacteroidetes	Sphingobacteria	Sphingobacteriales	Chitinophagaceae	Segetibacter
AAA240_K15_Cp_7.4_bact_AAIW_770m_HOT_HNA	Bacteria	Bacteroidetes	Flavobacteria	Flavobacteriales	NS9 marine group
AAA242_P21_Cp_8.2_bact_NPBW_4800m_HOT_HNA	Bacteria	Bacteroidetes	Flavobacteria	Flavobacteriales	Flavobacteriaceae	Kordia
AAA285_E07_Cp_11.4_bact_NPDW_3000m_HOT_HNA	Bacteria	Bacteroidetes	Flavobacteria	Flavobacteriales	Flavobacteriaceae	Kordia
AAA285_F05_Cp_8.2_bact_NPDW_3000m_HOT_HNA	Bacteria	Bacteroidetes	Flavobacteria	Flavobacteriales	Flavobacteriaceae	Kordia
AAA285_G17_Cp_10.1_bact_NPDW_3000m_HOT_HNA	Bacteria	Bacteroidetes	Flavobacteria	Flavobacteriales	Flavobacteriaceae	Kordia
AAA285_I08_Cp_14.2_bact_NPDW_3000m_HOT_HNA	Bacteria	Bacteroidetes	Flavobacteria	Flavobacteriales	Flavobacteriaceae	Kordia
AAA285_J13_Cp_14.0_bact_NPDW_3000m_HOT_HNA	Bacteria	Bacteroidetes	Flavobacteria	Flavobacteriales	Flavobacteriaceae	Kordia
AAA285_L07_Cp_14.7_bact_NPDW_3000m_HOT_HNA	Bacteria	Bacteroidetes	Flavobacteria	Flavobacteriales	Flavobacteriaceae	Kordia
AAA285_L09_Cp_12.4_bact_NPDW_3000m_HOT_HNA	Bacteria	Bacteroidetes	Flavobacteria	Flavobacteriales	Flavobacteriaceae	Kordia
AAA285_L13_Cp_13.6_bact_NPDW_3000m_HOT_HNA	Bacteria	Bacteroidetes	Flavobacteria	Flavobacteriales	Flavobacteriaceae	Kordia
AAA285_L16_Cp_9.6_bact_NPDW_3000m_HOT_HNA	Bacteria	Bacteroidetes	Flavobacteria	Flavobacteriales	Flavobacteriaceae	Kordia
AAA285_M10_Cp_13.6_bact_NPDW_3000m_HOT_HNA	Bacteria	Bacteroidetes	Flavobacteria	Flavobacteriales	Flavobacteriaceae	Kordia
AAA285_M19_Cp_9.3_bact_NPDW_3000m_HOT_HNA	Bacteria	Bacteroidetes	Flavobacteria	Flavobacteriales	Flavobacteriaceae	Kordia
AAA285_N19_Cp_12.4_bact_NPDW_3000m_HOT_HNA	Bacteria	Bacteroidetes	Flavobacteria	Flavobacteriales	Flavobacteriaceae	Kordia
AAA285_O05_Cp_14.2_bact_NPDW_3000m_HOT_HNA	Bacteria	Bacteroidetes	Flavobacteria	Flavobacteriales	Flavobacteriaceae	Kordia
AAA285_O16_Cp_13.6_bact_NPDW_3000m_HOT_HNA	Bacteria	Bacteroidetes	Flavobacteria	Flavobacteriales	Flavobacteriaceae	Kordia
AAA285_O21_Cp_14.6_bact_NPDW_3000m_HOT_HNA	Bacteria	Bacteroidetes	Flavobacteria	Flavobacteriales	Flavobacteriaceae	Kordia
AAA285_O23_Cp_8.5_bact_NPDW_3000m_HOT_HNA	Bacteria	Bacteroidetes	Flavobacteria	Flavobacteriales	Flavobacteriaceae	Kordia
AAA285_P22_Cp_13.8_bact_NPDW_3000m_HOT_HNA	Bacteria	Bacteroidetes	Flavobacteria	Flavobacteriales	Flavobacteriaceae	Kordia
AAA007_A05_Cp_9.4_bact_AIW_800m_SA_HNA	Bacteria	Bacteroidetes	Flavobacteria	Flavobacteriales	Flavobacteriaceae	Muricauda
AAA008_C03_Cp_6.5_bact_AIW_800m_SA_LNA	Bacteria	Bacteroidetes	Flavobacteria	Flavobacteriales	Flavobacteriaceae	NS2b marine group
AAA282_N17_Cp_6.8_bact_NPBW_4800m_HOT_LNA	Bacteria	Bacteroidetes	Flavobacteria	Flavobacteriales	Flavobacteriaceae	NS5 marine group
AAA242_J15_Cp_14.3_bact_NPBW_4800m_HOT_HNA	Bacteria	Chloroflexi	Chloroflexi Subdivision 8 - TK10
AAA240_O05_Cp_11.6_bact_AAIW_770m_HOT_HNA	Bacteria	Chloroflexi	Anaerolineae
AAA001_C21_Cp_00_bact_AIW_800m_SA_all	Bacteria	Chloroflexi	Chloroflexi Subdivision 5 - SAR202 clade
AAA001_F05_Cp_00_bact_AIW_800m_SA_all_seq	Bacteria	Chloroflexi	Chloroflexi Subdivision 5 - SAR202 clade
AAA007_G23_Cp_8.8_bact_AIW_800m_SA_HNA	Bacteria	Chloroflexi	Chloroflexi Subdivision 5 - SAR202 clade
AAA007_M09_Cp_13.3_bact_AIW_800m_SA_HNA_seq	Bacteria	Chloroflexi	Chloroflexi Subdivision 5 - SAR202 clade
AAA008_I06_Cp_11.4_bact_AIW_800m_SA_LNA	Bacteria	Chloroflexi	Chloroflexi Subdivision 5 - SAR202 clade
AAA240_B13_Cp_11.2_bact_AAIW_770m_HOT_HNA	Bacteria	Chloroflexi	Chloroflexi Subdivision 5 - SAR202 clade
AAA240_C09_Cp_14.1_bact_AAIW_770m_HOT_HNA	Bacteria	Chloroflexi	Chloroflexi Subdivision 5 - SAR202 clade
AAA240_C11_Cp_10.7_bact_AAIW_770m_HOT_HNA	Bacteria	Chloroflexi	Chloroflexi Subdivision 5 - SAR202 clade
AAA240_C18_Cp_6.7_bact_AAIW_770m_HOT_HNA	Bacteria	Chloroflexi	Chloroflexi Subdivision 5 - SAR202 clade
AAA240_F16_Cp_14.1_bact_AAIW_770m_HOT_HNA	Bacteria	Chloroflexi	Chloroflexi Subdivision 5 - SAR202 clade
AAA240_M02_Cp_6.2_bact_AAIW_770m_HOT_HNA	Bacteria	Chloroflexi	Chloroflexi Subdivision 5 - SAR202 clade
AAA240_N13_Cp_13.7_bact_AAIW_770m_HOT_HNA_seq	Bacteria	Chloroflexi	Chloroflexi Subdivision 5 - SAR202 clade
AAA240_N16_Cp_11.6_bact_AAIW_770m_HOT_HNA	Bacteria	Chloroflexi	Chloroflexi Subdivision 5 - SAR202 clade
AAA240_O15_Cp_14.1_bact_AAIW_770m_HOT_HNA_seq	Bacteria	Chloroflexi	Chloroflexi Subdivision 5 - SAR202 clade
AAA240_O20_Cp_8.0_bact_AAIW_770m_HOT_HNA	Bacteria	Chloroflexi	Chloroflexi Subdivision 5 - SAR202 clade
AAA240_P09_Cp_7.5_bact_AAIW_770m_HOT_HNA	Bacteria	Chloroflexi	Chloroflexi Subdivision 5 - SAR202 clade
AAA242_B19_Cp_11.3_bact_NPBW_4800m_HOT_HNA	Bacteria	Chloroflexi	Chloroflexi Subdivision 5 - SAR202 clade
AAA242_J05_Cp_6.1_bact_NPBW_4800m_HOT_HNA	Bacteria	Chloroflexi	Chloroflexi Subdivision 5 - SAR202 clade
AAA242_M02_Cp_13.8_bact_NPBW_4800m_HOT_HNA	Bacteria	Chloroflexi	Chloroflexi Subdivision 5 - SAR202 clade
AAA242_M04_Cp_10.7_bact_NPBW_4800m_HOT_HNA	Bacteria	Chloroflexi	Chloroflexi Subdivision 5 - SAR202 clade
AAA242_N23_Cp_8.3_bact_NPBW_4800m_HOT_HNA	Bacteria	Chloroflexi	Chloroflexi Subdivision 5 - SAR202 clade
AAA284_C06_Cp_13.4_bact_NPDW_3000m_HOT_HNA	Bacteria	Chloroflexi	Chloroflexi Subdivision 5 - SAR202 clade
AAA284_M15_Cp_14.3_bact_NPDW_3000m_HOT_HNA	Bacteria	Chloroflexi	Chloroflexi Subdivision 5 - SAR202 clade
AAA286_J07_Cp_14.2_bact_NPDW_3000m_HOT_LNA	Bacteria	Chloroflexi	Chloroflexi Subdivision 5 - SAR202 clade
AAA286_L09_Cp_12.8_bact_NPDW_3000m_HOT_LNA	Bacteria	Chloroflexi	Chloroflexi Subdivision 5 - SAR202 clade
AAA003_J23_Cp_00_bact_AIW_800m_SA_all	Bacteria	Planctomycetes	Pla3 lineage
AAA242_E17_Cp_13.9_bact_NPBW_4800m_HOT_HNA	Bacteria	Planctomycetes	Pla3 lineage
AAA240_E07_Cp_14.1_bact_AAIW_770m_HOT_HNA	Bacteria	Planctomycetes	OM190
AAA282_C19_Cp_10.8_bact_NPBW_4800m_HOT_LNA_seq	Bacteria	Planctomycetes	Phycisphaerae	Phycisphaerales	Phycisphaeraceae
AAA283_O08_Cp_12.8_bact_NPBW_4800m_HOT_LNA	Bacteria	Planctomycetes	Phycisphaerae	Phycisphaerales	Phycisphaeraceae
AAA001_J07_Cp_00_bact_AIW_800m_SA_all	Bacteria	Planctomycetes	Phycisphaerae	Phycisphaerales	Unknown Phycisphaerales family
AAA240_G14_Cp_14.1_bact_AAIW_770m_HOT_HNA	Bacteria	Planctomycetes	Phycisphaerae	Unknown Phycisphaerae order
AAA242_P02_Cp_12.8_bact_NPBW_4800m_HOT_HNA	Bacteria	Planctomycetes	Planctomycetacia	Planctomycetales	Planctomycetaceae
AAA242_C17_Cp_13.6_bact_NPBW_4800m_HOT_HNA	Bacteria	Planctomycetes	Planctomycetacia	Planctomycetales	Planctomycetaceae	Rhodopirellula
AAA242_M18_Cp_11.1_bact_NPBW_4800m_HOT_HNA	Bacteria	Planctomycetes	Planctomycetacia	Planctomycetales	Planctomycetaceae	Rhodopirellula
AAA240_F15_Cp_11.7_bact_AAIW_770m_HOT_HNA_seq	Bacteria	Planctomycetes	Planctomycetacia	Planctomycetales	Unknown Planctomycetales family
AAA240_N21_Cp_12.4_bact_AAIW_770m_HOT_HNA	Bacteria	Planctomycetes	Planctomycetacia	Planctomycetales	Unknown Planctomycetales family
AAA242_F18_Cp_14.7_bact_NPBW_4800m_HOT_HNA	Bacteria	Planctomycetes	Planctomycetacia	Planctomycetales	Unknown Planctomycetales family
AAA003_J17_Cp_00_bact_AIW_800m_SA_all_seq	Bacteria	Acidobacteria	RB25	Acidobacteria group 26
AAA007_K07_Cp_14.1_bact_AIW_800m_SA_HNA	Bacteria	Acidobacteria	RB25	Acidobacteria group 26
AAA240_B16_Cp_14.1_bact_AAIW_770m_HOT_HNA	Bacteria	Acidobacteria	RB25	Acidobacteria group 26
AAA240_C04_Cp_14.1_bact_AAIW_770m_HOT_HNA	Bacteria	Acidobacteria	RB25	Acidobacteria group 26
AAA240_L09_Cp_7.2_bact_AAIW_770m_HOT_HNA_seq	Bacteria	Acidobacteria	RB25	Acidobacteria group 26
AAA284_I20_Cp_15.2_bact_NPDW_3000m_HOT_HNA	Bacteria	Acidobacteria	Acidobacteria (class)	Acidobacteria group 21 (BPC102)
AAA240_K18_Cp_14.1_bact_AAIW_770m_HOT_HNA	Bacteria	Acidobacteria	Acidobacteria (class)	Acidobacteria group 5
AAA007_N14_Cp_12.9_bact_AIW_800m_SA_HNA	Bacteria	Acidobacteria	Acidobacteria (class)	Acidobacteria group 6 (DA023)
AAA007_P13_Cp_12.9_bact_AIW_800m_SA_HNA	Bacteria	Acidobacteria	Acidobacteria (class)	Acidobacteria group 6 (DA023)
AAA242_N04_Cp_8.8_bact_NPBW_4800m_HOT_HNA	Bacteria	Proteobacteria
AAA240_I16_Cp_12.8_bact_AAIW_770m_HOT_HNA	Bacteria	Proteobacteria	SPOTSOCT00	5m83
AAA001_C22_Cp_00_bact_AIW_800m_SA_all	Bacteria	Proteobacteria	Deltaproteobacteria	Nitrospinaceae order incertae sedis	Nitrospinaceae	Nitrospina
AAA001_E21_Cp_00_bact_AIW_800m_SA_all	Bacteria	Proteobacteria	Deltaproteobacteria	Nitrospinaceae order incertae sedis	Nitrospinaceae	Nitrospina
AAA001_J21_Cp_00_bact_AIW_800m_SA_all	Bacteria	Proteobacteria	Deltaproteobacteria	Nitrospinaceae order incertae sedis	Nitrospinaceae	Nitrospina
AAA003_A14_Cp_00_bact_AIW_800m_SA_all	Bacteria	Proteobacteria	Deltaproteobacteria	Nitrospinaceae order incertae sedis	Nitrospinaceae	Nitrospina
AAA003_C16_Cp_00_bact_AIW_800m_SA_all	Bacteria	Proteobacteria	Deltaproteobacteria	Nitrospinaceae order incertae sedis	Nitrospinaceae	Nitrospina
AAA003_E20_Cp_00_bact_AIW_800m_SA_all	Bacteria	Proteobacteria	Deltaproteobacteria	Nitrospinaceae order incertae sedis	Nitrospinaceae	Nitrospina
AAA003_G17_Cp_00_bact_AIW_800m_SA_all	Bacteria	Proteobacteria	Deltaproteobacteria	Nitrospinaceae order incertae sedis	Nitrospinaceae	Nitrospina
AAA008_D05_Cp_7.1_bact_AIW_800m_SA_LNA	Bacteria	Proteobacteria	Deltaproteobacteria	Nitrospinaceae order incertae sedis	Nitrospinaceae	Nitrospina
AAA240_A16_Cp_6.9_bact_AAIW_770m_HOT_HNA	Bacteria	Proteobacteria	Deltaproteobacteria	Nitrospinaceae order incertae sedis	Nitrospinaceae	Nitrospina
AAA240_B06_Cp_8.2_bact_AAIW_770m_HOT_HNA	Bacteria	Proteobacteria	Deltaproteobacteria	Nitrospinaceae order incertae sedis	Nitrospinaceae	Nitrospina
AAA240_G05_Cp_6.4_bact_AAIW_770m_HOT_HNA	Bacteria	Proteobacteria	Deltaproteobacteria	Nitrospinaceae order incertae sedis	Nitrospinaceae	Nitrospina
AAA240_M22_Cp_7.4_bact_AAIW_770m_HOT_HNA	Bacteria	Proteobacteria	Deltaproteobacteria	Nitrospinaceae order incertae sedis	Nitrospinaceae	Nitrospina
AAA240_N03_Cp_6.1_bact_AAIW_770m_HOT_HNA	Bacteria	Proteobacteria	Deltaproteobacteria	Nitrospinaceae order incertae sedis	Nitrospinaceae	Nitrospina
AAA240_O22_Cp_7.0_bact_AAIW_770m_HOT_HNA	Bacteria	Proteobacteria	Deltaproteobacteria	Nitrospinaceae order incertae sedis	Nitrospinaceae	Nitrospina
AAA283_A11_Cp_8.4_bact_NPBW_4800m_HOT_LNA	Bacteria	Proteobacteria	Deltaproteobacteria	Nitrospinaceae order incertae sedis	Nitrospinaceae	Nitrospina
AAA286_M02_Cp_8.1_bact_NPDW_3000m_HOT_LNA	Bacteria	Proteobacteria	Deltaproteobacteria	Nitrospinaceae order incertae sedis	Nitrospinaceae	Nitrospina
AAA286_M15_Cp_12.8_bact_NPDW_3000m_HOT_LNA	Bacteria	Proteobacteria	Deltaproteobacteria	Nitrospinaceae order incertae sedis	Nitrospinaceae	Nitrospina
AAA286_P03_Cp_10.6_bact_NPDW_3000m_HOT_LNA	Bacteria	Proteobacteria	Deltaproteobacteria	Nitrospinaceae order incertae sedis	Nitrospinaceae	Nitrospina
AAA240_J07_Cp_7.7_bact_AAIW_770m_HOT_HNA	Bacteria	Proteobacteria	Deltaproteobacteria	Nitrospinaceae order incertae sedis	Unknown Nitrospinaceae order incertae sedis family
AAA242_I09_Cp_11.9_bact_NPBW_4800m_HOT_HNA	Bacteria	Proteobacteria	Deltaproteobacteria	Desulfurellales	Unknown Desulfurellales family
AAA003_K20_Cp_00_bact_AIW_800m_SA_all	Bacteria	Proteobacteria	Deltaproteobacteria	Bdellovibrionales	Unknown Bdellovibrionales family
AAA283_L17_Cp_7.9_bact_NPBW_4800m_HOT_LNA	Bacteria	Proteobacteria	Deltaproteobacteria	Sh765B-TzT-29
AAA001_A18_Cp_00_bact_AIW_800m_SA_all	Bacteria	Proteobacteria	Deltaproteobacteria	SAR324 clade(Marine group B)
AAA001_C10_Cp_00_bact_AIW_800m_SA_all_seq	Bacteria	Proteobacteria	Deltaproteobacteria	SAR324 clade(Marine group B)
AAA001_E14_Cp_00_bact_AIW_800m_SA_all	Bacteria	Proteobacteria	Deltaproteobacteria	SAR324 clade(Marine group B)
AAA003_C18_Cp_00_bact_AIW_800m_SA_all	Bacteria	Proteobacteria	Deltaproteobacteria	SAR324 clade(Marine group B)
AAA003_C23_Cp_00_bact_AIW_800m_SA_all	Bacteria	Proteobacteria	Deltaproteobacteria	SAR324 clade(Marine group B)
AAA003_D09_Cp_00_bact_AIW_800m_SA_all	Bacteria	Proteobacteria	Deltaproteobacteria	SAR324 clade(Marine group B)
AAA003_F06_Cp_00_bact_AIW_800m_SA_all	Bacteria	Proteobacteria	Deltaproteobacteria	SAR324 clade(Marine group B)
AAA003_F15_Cp_00_bact_AIW_800m_SA_all_seq	Bacteria	Proteobacteria	Deltaproteobacteria	SAR324 clade(Marine group B)
AAA003_G02_Cp_00_bact_AIW_800m_SA_all	Bacteria	Proteobacteria	Deltaproteobacteria	SAR324 clade(Marine group B)
AAA003_G16_Cp_00_bact_AIW_800m_SA_all	Bacteria	Proteobacteria	Deltaproteobacteria	SAR324 clade(Marine group B)
AAA003_J20_Cp_00_bact_AIW_800m_SA_all	Bacteria	Proteobacteria	Deltaproteobacteria	SAR324 clade(Marine group B)
AAA003_M18_Cp_00_bact_AIW_800m_SA_all	Bacteria	Proteobacteria	Deltaproteobacteria	SAR324 clade(Marine group B)
AAA003_P17_Cp_00_bact_AIW_800m_SA_all	Bacteria	Proteobacteria	Deltaproteobacteria	SAR324 clade(Marine group B)
AAA003_P20_Cp_00_bact_AIW_800m_SA_all	Bacteria	Proteobacteria	Deltaproteobacteria	SAR324 clade(Marine group B)
AAA007_B19_Cp_6.6_bact_AIW_800m_SA_HNA	Bacteria	Proteobacteria	Deltaproteobacteria	SAR324 clade(Marine group B)
AAA007_B20_Cp_8.2_bact_AIW_800m_SA_HNA	Bacteria	Proteobacteria	Deltaproteobacteria	SAR324 clade(Marine group B)
AAA007_C09_Cp_10.6_bact_AIW_800m_SA_HNA	Bacteria	Proteobacteria	Deltaproteobacteria	SAR324 clade(Marine group B)
AAA007_C22_Cp_6.1_bact_AIW_800m_SA_HNA	Bacteria	Proteobacteria	Deltaproteobacteria	SAR324 clade(Marine group B)
AAA007_D03_Cp_8.5_bact_AIW_800m_SA_HNA	Bacteria	Proteobacteria	Deltaproteobacteria	SAR324 clade(Marine group B)
AAA007_D22_Cp_6.5_bact_AIW_800m_SA_HNA	Bacteria	Proteobacteria	Deltaproteobacteria	SAR324 clade(Marine group B)
AAA007_E07_Cp_8.2_bact_AIW_800m_SA_HNA	Bacteria	Proteobacteria	Deltaproteobacteria	SAR324 clade(Marine group B)
AAA007_G04_Cp_8.6_bact_AIW_800m_SA_HNA	Bacteria	Proteobacteria	Deltaproteobacteria	SAR324 clade(Marine group B)
AAA007_G21_Cp_8.2_bact_AIW_800m_SA_HNA	Bacteria	Proteobacteria	Deltaproteobacteria	SAR324 clade(Marine group B)
AAA007_K18_Cp_9.1_bact_AIW_800m_SA_HNA	Bacteria	Proteobacteria	Deltaproteobacteria	SAR324 clade(Marine group B)
AAA007_M04_Cp_6.0_bact_AIW_800m_SA_HNA	Bacteria	Proteobacteria	Deltaproteobacteria	SAR324 clade(Marine group B)
AAA007_M16_Cp_6.7_bact_AIW_800m_SA_HNA	Bacteria	Proteobacteria	Deltaproteobacteria	SAR324 clade(Marine group B)
AAA007_O02_Cp_6.9_bact_AIW_800m_SA_HNA	Bacteria	Proteobacteria	Deltaproteobacteria	SAR324 clade(Marine group B)
AAA008_E19_Cp_7.2_bact_AIW_800m_SA_LNA	Bacteria	Proteobacteria	Deltaproteobacteria	SAR324 clade(Marine group B)
AAA008_N17_Cp_7.4_bact_AIW_800m_SA_LNA	Bacteria	Proteobacteria	Deltaproteobacteria	SAR324 clade(Marine group B)
AAA240_A22_Cp_6.0_bact_AAIW_770m_HOT_HNA	Bacteria	Proteobacteria	Deltaproteobacteria	SAR324 clade(Marine group B)
AAA240_B17_Cp_8.4_bact_AAIW_770m_HOT_HNA	Bacteria	Proteobacteria	Deltaproteobacteria	SAR324 clade(Marine group B)
AAA240_B22_Cp_7.5_bact_AAIW_770m_HOT_HNA	Bacteria	Proteobacteria	Deltaproteobacteria	SAR324 clade(Marine group B)
AAA240_C23_Cp_7.1_bact_AAIW_770m_HOT_HNA	Bacteria	Proteobacteria	Deltaproteobacteria	SAR324 clade(Marine group B)
AAA240_D07_Cp_6.7_bact_AAIW_770m_HOT_HNA	Bacteria	Proteobacteria	Deltaproteobacteria	SAR324 clade(Marine group B)
AAA240_D10_Cp_7.4_bact_AAIW_770m_HOT_HNA	Bacteria	Proteobacteria	Deltaproteobacteria	SAR324 clade(Marine group B)
AAA240_D11_Cp_8.2_bact_AAIW_770m_HOT_HNA	Bacteria	Proteobacteria	Deltaproteobacteria	SAR324 clade(Marine group B)
AAA240_D19_Cp_6.8_bact_AAIW_770m_HOT_HNA	Bacteria	Proteobacteria	Deltaproteobacteria	SAR324 clade(Marine group B)
AAA240_E20_Cp_6.9_bact_AAIW_770m_HOT_HNA	Bacteria	Proteobacteria	Deltaproteobacteria	SAR324 clade(Marine group B)
AAA240_F18_Cp_7.2_bact_AAIW_770m_HOT_HNA	Bacteria	Proteobacteria	Deltaproteobacteria	SAR324 clade(Marine group B)
AAA240_G03_Cp_6.2_bact_AAIW_770m_HOT_HNA	Bacteria	Proteobacteria	Deltaproteobacteria	SAR324 clade(Marine group B)
AAA240_G18_Cp_6.1_bact_AAIW_770m_HOT_HNA	Bacteria	Proteobacteria	Deltaproteobacteria	SAR324 clade(Marine group B)
AAA240_I02_Cp_6.5_bact_AAIW_770m_HOT_HNA	Bacteria	Proteobacteria	Deltaproteobacteria	SAR324 clade(Marine group B)
AAA240_I05_Cp_7.5_bact_AAIW_770m_HOT_HNA	Bacteria	Proteobacteria	Deltaproteobacteria	SAR324 clade(Marine group B)
AAA240_I07_Cp_8.7_bact_AAIW_770m_HOT_HNA	Bacteria	Proteobacteria	Deltaproteobacteria	SAR324 clade(Marine group B)
AAA240_I08_Cp_7.1_bact_AAIW_770m_HOT_HNA	Bacteria	Proteobacteria	Deltaproteobacteria	SAR324 clade(Marine group B)
AAA240_I11_Cp_8.8_bact_AAIW_770m_HOT_HNA	Bacteria	Proteobacteria	Deltaproteobacteria	SAR324 clade(Marine group B)
AAA240_J09_Cp_7.5_bact_AAIW_770m_HOT_HNA_seq	Bacteria	Proteobacteria	Deltaproteobacteria	SAR324 clade(Marine group B)
AAA240_J16_Cp_7.3_bact_AAIW_770m_HOT_HNA	Bacteria	Proteobacteria	Deltaproteobacteria	SAR324 clade(Marine group B)
AAA240_J17_Cp_8.7_bact_AAIW_770m_HOT_HNA	Bacteria	Proteobacteria	Deltaproteobacteria	SAR324 clade(Marine group B)
AAA240_J23_Cp_6.6_bact_AAIW_770m_HOT_HNA	Bacteria	Proteobacteria	Deltaproteobacteria	SAR324 clade(Marine group B)
AAA240_K04_Cp_8.2_bact_AAIW_770m_HOT_HNA	Bacteria	Proteobacteria	Deltaproteobacteria	SAR324 clade(Marine group B)
AAA240_M06_Cp_9.4_bact_AAIW_770m_HOT_HNA	Bacteria	Proteobacteria	Deltaproteobacteria	SAR324 clade(Marine group B)
AAA240_M14_Cp_7.1_bact_AAIW_770m_HOT_HNA	Bacteria	Proteobacteria	Deltaproteobacteria	SAR324 clade(Marine group B)
AAA240_M16_Cp_7.4_bact_AAIW_770m_HOT_HNA	Bacteria	Proteobacteria	Deltaproteobacteria	SAR324 clade(Marine group B)
AAA240_M21_Cp_9.5_bact_AAIW_770m_HOT_HNA	Bacteria	Proteobacteria	Deltaproteobacteria	SAR324 clade(Marine group B)
AAA240_N18_Cp_6.3_bact_AAIW_770m_HOT_HNA	Bacteria	Proteobacteria	Deltaproteobacteria	SAR324 clade(Marine group B)
AAA240_N20_Cp_5.5_bact_AAIW_770m_HOT_HNA	Bacteria	Proteobacteria	Deltaproteobacteria	SAR324 clade(Marine group B)
AAA240_N23_Cp_5.3_bact_AAIW_770m_HOT_HNA	Bacteria	Proteobacteria	Deltaproteobacteria	SAR324 clade(Marine group B)
AAA240_O02_Cp_5.9_bact_AAIW_770m_HOT_HNA	Bacteria	Proteobacteria	Deltaproteobacteria	SAR324 clade(Marine group B)
AAA240_O18_Cp_6.9_bact_AAIW_770m_HOT_HNA	Bacteria	Proteobacteria	Deltaproteobacteria	SAR324 clade(Marine group B)
AAA240_P21_Cp_5.4_bact_AAIW_770m_HOT_HNA	Bacteria	Proteobacteria	Deltaproteobacteria	SAR324 clade(Marine group B)
AAA242_G08_Cp_7.0_bact_NPBW_4800m_HOT_HNA	Bacteria	Proteobacteria	Deltaproteobacteria	SAR324 clade(Marine group B)
AAA242_G11_Cp_8.9_bact_NPBW_4800m_HOT_HNA	Bacteria	Proteobacteria	Deltaproteobacteria	SAR324 clade(Marine group B)
AAA242_I23_Cp_6.1_bact_NPBW_4800m_HOT_HNA	Bacteria	Proteobacteria	Deltaproteobacteria	SAR324 clade(Marine group B)
AAA242_K09_Cp_14.2_bact_NPBW_4800m_HOT_HNA	Bacteria	Proteobacteria	Deltaproteobacteria	SAR324 clade(Marine group B)
AAA242_K20_Cp_14.6_bact_NPBW_4800m_HOT_HNA	Bacteria	Proteobacteria	Deltaproteobacteria	SAR324 clade(Marine group B)
AAA242_L06_Cp_6.7_bact_NPBW_4800m_HOT_HNA	Bacteria	Proteobacteria	Deltaproteobacteria	SAR324 clade(Marine group B)
AAA282_E05_Cp_7.4_bact_NPBW_4800m_HOT_LNA	Bacteria	Proteobacteria	Deltaproteobacteria	SAR324 clade(Marine group B)
AAA283_A20_Cp_6.4_bact_NPBW_4800m_HOT_LNA	Bacteria	Proteobacteria	Deltaproteobacteria	SAR324 clade(Marine group B)
AAA283_J11_Cp_6.9_bact_NPBW_4800m_HOT_LNA	Bacteria	Proteobacteria	Deltaproteobacteria	SAR324 clade(Marine group B)
AAA283_J20_Cp_7.0_bact_NPBW_4800m_HOT_LNA	Bacteria	Proteobacteria	Deltaproteobacteria	SAR324 clade(Marine group B)
AAA283_O02_Cp_6.5_bact_NPBW_4800m_HOT_LNA	Bacteria	Proteobacteria	Deltaproteobacteria	SAR324 clade(Marine group B)
AAA284_O13_Cp_9.6_bact_NPDW_3000m_HOT_HNA	Bacteria	Proteobacteria	Deltaproteobacteria	SAR324 clade(Marine group B)
AAA286_D10_Cp_8.3_bact_NPDW_3000m_HOT_LNA	Bacteria	Proteobacteria	Deltaproteobacteria	SAR324 clade(Marine group B)
AAA286_F05_Cp_11.1_bact_NPDW_3000m_HOT_LNA	Bacteria	Proteobacteria	Deltaproteobacteria	SAR324 clade(Marine group B)
AAA286_I16_Cp_11.3_bact_NPDW_3000m_HOT_LNA	Bacteria	Proteobacteria	Deltaproteobacteria	SAR324 clade(Marine group B)
AAA286_K08_Cp_6.7_bact_NPDW_3000m_HOT_LNA	Bacteria	Proteobacteria	Deltaproteobacteria	SAR324 clade(Marine group B)
AAA240_E03_Cp_7.0_bact_AAIW_770m_HOT_HNA	Bacteria	Proteobacteria	Deltaproteobacteria	Myxococcales	Nannocystineae
AAA240_J05_Cp_11.7_bact_AAIW_770m_HOT_HNA_seq	Bacteria	Proteobacteria	Deltaproteobacteria	Unknown Deltaproteobacteria order
AAA284_A20_Cp_14.4_bact_NPDW_3000m_HOT_HNA	Bacteria	Proteobacteria	Deltaproteobacteria	Unknown Deltaproteobacteria order
AAA007_D21_Cp_6.5_bact_AIW_800m_SA_HNA	Bacteria	Proteobacteria	Alphaproteobacteria	MNG3
AAA240_O23_Cp_7.6_bact_AAIW_770m_HOT_HNA	Bacteria	Proteobacteria	Alphaproteobacteria	MNG3
AAA283_N16_Cp_11.8_bact_NPBW_4800m_HOT_LNA	Bacteria	Proteobacteria	Alphaproteobacteria	MNG3
AAA284_B10_Cp_14.0_bact_NPDW_3000m_HOT_HNA	Bacteria	Proteobacteria	Alphaproteobacteria	MNG3
AAA003_K19_Cp_00_bact_AIW_800m_SA_all	Bacteria	Proteobacteria	Alphaproteobacteria	Caulobacterales	Caulobacteraceae
AAA240_L17_Cp_6.9_bact_AAIW_770m_HOT_HNA	Bacteria	Proteobacteria	Alphaproteobacteria	Rickettsiales	S25-593
AAA282_F06_Cp_7.8_bact_NPBW_4800m_HOT_LNA	Bacteria	Proteobacteria	Alphaproteobacteria	Rickettsiales	S25-593
AAA282_E08_Cp_7.6_bact_NPBW_4800m_HOT_LNA	Bacteria	Proteobacteria	Alphaproteobacteria	Rickettsiales	SAR116 clade
AAA242_I17_Cp_14.3_bact_NPBW_4800m_HOT_HNA	Bacteria	Proteobacteria	Alphaproteobacteria	Rickettsiales	Unknown Rickettsiales family
AAA242_P09_Cp_8.7_bact_NPBW_4800m_HOT_HNA	Bacteria	Proteobacteria	Alphaproteobacteria	Rhodobacterales	Rhodobacteraceae
AAA007_F15_Cp_14.1_bact_AIW_800m_SA_HNA	Bacteria	Proteobacteria	Alphaproteobacteria	Rhodospirillales	Rhodospirillaceae
AAA242_A04_Cp_10.8_bact_NPBW_4800m_HOT_HNA	Bacteria	Proteobacteria	Alphaproteobacteria	Rhodospirillales	Rhodospirillaceae
AAA242_B05_Cp_11.5_bact_NPBW_4800m_HOT_HNA	Bacteria	Proteobacteria	Alphaproteobacteria	Rhodospirillales	Rhodospirillaceae
AAA242_C23_Cp_6.1_bact_NPBW_4800m_HOT_HNA	Bacteria	Proteobacteria	Alphaproteobacteria	Rhodospirillales	Rhodospirillaceae
AAA242_D10_Cp_12.6_bact_NPBW_4800m_HOT_HNA	Bacteria	Proteobacteria	Alphaproteobacteria	Rhodospirillales	Rhodospirillaceae
AAA242_E05_Cp_8.8_bact_NPBW_4800m_HOT_HNA	Bacteria	Proteobacteria	Alphaproteobacteria	Rhodospirillales	Rhodospirillaceae
AAA242_J13_Cp_6.0_bact_NPBW_4800m_HOT_HNA	Bacteria	Proteobacteria	Alphaproteobacteria	Rhodospirillales	Rhodospirillaceae
AAA242_O17_Cp_8.9_bact_NPBW_4800m_HOT_HNA	Bacteria	Proteobacteria	Alphaproteobacteria	Rhodospirillales	Rhodospirillaceae
AAA283_C07_Cp_12.0_bact_NPBW_4800m_HOT_LNA	Bacteria	Proteobacteria	Alphaproteobacteria	Rhodospirillales	Rhodospirillaceae
AAA008_F18_Cp_7.9_bact_AIW_800m_SA_LNA	Bacteria	Proteobacteria	Alphaproteobacteria	Rhodospirillales	Rhodospirillaceae	AEGEAN-169 marine group
AAA008_G20_Cp_6.7_bact_AIW_800m_SA_LNA	Bacteria	Proteobacteria	Alphaproteobacteria	Rhodospirillales	Rhodospirillaceae	AEGEAN-169 marine group
AAA240_D18_Cp_6.8_bact_AAIW_770m_HOT_HNA	Bacteria	Proteobacteria	Alphaproteobacteria	Rhodospirillales	Rhodospirillaceae	AEGEAN-169 marine group
AAA242_K08_Cp_11.8_bact_NPBW_4800m_HOT_HNA	Bacteria	Proteobacteria	Alphaproteobacteria	Rhodospirillales	Rhodospirillaceae	AEGEAN-169 marine group
AAA282_D07_Cp_7.8_bact_NPBW_4800m_HOT_LNA	Bacteria	Proteobacteria	Alphaproteobacteria	Rhodospirillales	Rhodospirillaceae	AEGEAN-169 marine group
AAA283_I05_Cp_7.9_bact_NPBW_4800m_HOT_LNA	Bacteria	Proteobacteria	Alphaproteobacteria	Rhodospirillales	Rhodospirillaceae	AEGEAN-169 marine group
AAA287_O18_Cp_9.3_bact_NPDW_3000m_HOT_LNA	Bacteria	Proteobacteria	Alphaproteobacteria	Rhodospirillales	Rhodospirillaceae	AEGEAN-169 marine group
AAA003_F10_Cp_00_bact_AIW_800m_SA_all	Bacteria	Proteobacteria	Alphaproteobacteria	Rhodospirillales	Rhodospirillaceae	Defluviicoccus
AAA284_B16_Cp_13.9_bact_NPDW_3000m_HOT_HNA	Bacteria	Proteobacteria	Alphaproteobacteria	Rhodospirillales	Rhodospirillaceae	Defluviicoccus
AAA003_A19_Cp_00_bact_AIW_800m_SA_all	Bacteria	Proteobacteria	Alphaproteobacteria	Rhodospirillales	Rhodospirillaceae	Unknown Rhodospirillaceae genus
AAA008_O15_Cp_8.2_bact_AIW_800m_SA_LNA	Bacteria	Proteobacteria	Alphaproteobacteria	Rhodospirillales	Rhodospirillaceae	Unknown Rhodospirillaceae genus
AAA242_M09_Cp_14.2_bact_NPBW_4800m_HOT_HNA	Bacteria	Proteobacteria	Alphaproteobacteria	Rhodospirillales	Unknown Rhodospirillales family
AAA003_D08_Cp_00_bact_AIW_800m_SA_all	Bacteria	Proteobacteria	Alphaproteobacteria	SAR11 clade
AAA007_F19_Cp_7.4_bact_AIW_800m_SA_HNA	Bacteria	Proteobacteria	Alphaproteobacteria	SAR11 clade
AAA008_D09_Cp_9.3_bact_AIW_800m_SA_LNA	Bacteria	Proteobacteria	Alphaproteobacteria	SAR11 clade
AAA008_F09_Cp_8.1_bact_AIW_800m_SA_LNA	Bacteria	Proteobacteria	Alphaproteobacteria	SAR11 clade
AAA008_I19_Cp_7.0_bact_AIW_800m_SA_LNA	Bacteria	Proteobacteria	Alphaproteobacteria	SAR11 clade
AAA008_J13_Cp_9.4_bact_AIW_800m_SA_LNA	Bacteria	Proteobacteria	Alphaproteobacteria	SAR11 clade
AAA008_L05_Cp_9.8_bact_AIW_800m_SA_LNA	Bacteria	Proteobacteria	Alphaproteobacteria	SAR11 clade
AAA008_L15_Cp_9.2_bact_AIW_800m_SA_LNA	Bacteria	Proteobacteria	Alphaproteobacteria	SAR11 clade
AAA008_M13_Cp_6.3_bact_AIW_800m_SA_LNA	Bacteria	Proteobacteria	Alphaproteobacteria	SAR11 clade
AAA008_N20_Cp_6.5_bact_AIW_800m_SA_LNA	Bacteria	Proteobacteria	Alphaproteobacteria	SAR11 clade
AAA008_P09_Cp_6.8_bact_AIW_800m_SA_LNA	Bacteria	Proteobacteria	Alphaproteobacteria	SAR11 clade
AAA282_B22_Cp_7.1_bact_NPBW_4800m_HOT_LNA	Bacteria	Proteobacteria	Alphaproteobacteria	SAR11 clade
AAA286_F09_Cp_11.1_bact_NPDW_3000m_HOT_LNA	Bacteria	Proteobacteria	Alphaproteobacteria	SAR11 clade
AAA286_P11_Cp_7.9_bact_NPDW_3000m_HOT_LNA	Bacteria	Proteobacteria	Alphaproteobacteria	SAR11 clade
AAA287_G05_Cp_8.8_bact_NPDW_3000m_HOT_LNA_seq	Bacteria	Proteobacteria	Alphaproteobacteria	SAR11 clade
AAA287_K17_Cp_7.6_bact_NPDW_3000m_HOT_LNA	Bacteria	Proteobacteria	Alphaproteobacteria	SAR11 clade
AAA287_M06_Cp_6.7_bact_NPDW_3000m_HOT_LNA_seq	Bacteria	Proteobacteria	Alphaproteobacteria	SAR11 clade
AAA001_C06_Cp_00_bact_AIW_800m_SA_all	Bacteria	Proteobacteria	Alphaproteobacteria	SAR11 clade	Deep 1
AAA001_D08_Cp_00_bact_AIW_800m_SA_all	Bacteria	Proteobacteria	Alphaproteobacteria	SAR11 clade	Deep 1
AAA001_N08_Cp_00_bact_AIW_800m_SA_all	Bacteria	Proteobacteria	Alphaproteobacteria	SAR11 clade	Deep 1
AAA003_A04_Cp_00_bact_AIW_800m_SA_all	Bacteria	Proteobacteria	Alphaproteobacteria	SAR11 clade	Deep 1
AAA003_D21_Cp_00_bact_AIW_800m_SA_all	Bacteria	Proteobacteria	Alphaproteobacteria	SAR11 clade	Deep 1
AAA003_F20_Cp_00_bact_AIW_800m_SA_all	Bacteria	Proteobacteria	Alphaproteobacteria	SAR11 clade	Deep 1
AAA003_L10_Cp_00_bact_AIW_800m_SA_all	Bacteria	Proteobacteria	Alphaproteobacteria	SAR11 clade	Deep 1
AAA003_M10_Cp_00_bact_AIW_800m_SA_all	Bacteria	Proteobacteria	Alphaproteobacteria	SAR11 clade	Deep 1
AAA003_M14_Cp_00_bact_AIW_800m_SA_all	Bacteria	Proteobacteria	Alphaproteobacteria	SAR11 clade	Deep 1
AAA003_N17_Cp_00_bact_AIW_800m_SA_all	Bacteria	Proteobacteria	Alphaproteobacteria	SAR11 clade	Deep 1
AAA007_L14_Cp_6.1_bact_AIW_800m_SA_HNA	Bacteria	Proteobacteria	Alphaproteobacteria	SAR11 clade	Deep 1
AAA008_A11_Cp_10.6_bact_AIW_800m_SA_LNA	Bacteria	Proteobacteria	Alphaproteobacteria	SAR11 clade	Deep 1
AAA008_A14_Cp_6.4_bact_AIW_800m_SA_LNA	Bacteria	Proteobacteria	Alphaproteobacteria	SAR11 clade	Deep 1
AAA008_C05_Cp_7.1_bact_AIW_800m_SA_LNA	Bacteria	Proteobacteria	Alphaproteobacteria	SAR11 clade	Deep 1
AAA008_D03_Cp_9.6_bact_AIW_800m_SA_LNA	Bacteria	Proteobacteria	Alphaproteobacteria	SAR11 clade	Deep 1
AAA008_D14_Cp_8.9_bact_AIW_800m_SA_LNA	Bacteria	Proteobacteria	Alphaproteobacteria	SAR11 clade	Deep 1
AAA008_D23_Cp_8.1_bact_AIW_800m_SA_LNA	Bacteria	Proteobacteria	Alphaproteobacteria	SAR11 clade	Deep 1
AAA008_E11_Cp_11.6_bact_AIW_800m_SA_LNA	Bacteria	Proteobacteria	Alphaproteobacteria	SAR11 clade	Deep 1
AAA008_E13_Cp_5.9_bact_AIW_800m_SA_LNA	Bacteria	Proteobacteria	Alphaproteobacteria	SAR11 clade	Deep 1
AAA008_G05_Cp_9.9_bact_AIW_800m_SA_LNA	Bacteria	Proteobacteria	Alphaproteobacteria	SAR11 clade	Deep 1
AAA008_I14_Cp_6.7_bact_AIW_800m_SA_LNA	Bacteria	Proteobacteria	Alphaproteobacteria	SAR11 clade	Deep 1
AAA240_B19_Cp_7.8_bact_AAIW_770m_HOT_HNA	Bacteria	Proteobacteria	Alphaproteobacteria	SAR11 clade	Deep 1
AAA240_E14_Cp_7.4_bact_AAIW_770m_HOT_HNA	Bacteria	Proteobacteria	Alphaproteobacteria	SAR11 clade	Deep 1
AAA282_C10_Cp_8.8_bact_NPBW_4800m_HOT_LNA	Bacteria	Proteobacteria	Alphaproteobacteria	SAR11 clade	Deep 1
AAA282_C18_Cp_6.1_bact_NPBW_4800m_HOT_LNA	Bacteria	Proteobacteria	Alphaproteobacteria	SAR11 clade	Deep 1
AAA282_D19_Cp_6.7_bact_NPBW_4800m_HOT_LNA	Bacteria	Proteobacteria	Alphaproteobacteria	SAR11 clade	Deep 1
AAA282_F04_Cp_8.6_bact_NPBW_4800m_HOT_LNA	Bacteria	Proteobacteria	Alphaproteobacteria	SAR11 clade	Deep 1
AAA283_A05_Cp_7.2_bact_NPBW_4800m_HOT_LNA	Bacteria	Proteobacteria	Alphaproteobacteria	SAR11 clade	Deep 1
AAA283_B08_Cp_9.2_bact_NPBW_4800m_HOT_LNA	Bacteria	Proteobacteria	Alphaproteobacteria	SAR11 clade	Deep 1
AAA283_C09_Cp_6.7_bact_NPBW_4800m_HOT_LNA	Bacteria	Proteobacteria	Alphaproteobacteria	SAR11 clade	Deep 1
AAA283_C10_Cp_7.5_bact_NPBW_4800m_HOT_LNA	Bacteria	Proteobacteria	Alphaproteobacteria	SAR11 clade	Deep 1
AAA283_E02_Cp_6.6_bact_NPBW_4800m_HOT_LNA	Bacteria	Proteobacteria	Alphaproteobacteria	SAR11 clade	Deep 1
AAA283_G07_Cp_6.8_bact_NPBW_4800m_HOT_LNA	Bacteria	Proteobacteria	Alphaproteobacteria	SAR11 clade	Deep 1
AAA283_I15_Cp_7.1_bact_NPBW_4800m_HOT_LNA	Bacteria	Proteobacteria	Alphaproteobacteria	SAR11 clade	Deep 1
AAA283_J07_Cp_9.1_bact_NPBW_4800m_HOT_LNA	Bacteria	Proteobacteria	Alphaproteobacteria	SAR11 clade	Deep 1
AAA283_K22_Cp_7.7_bact_NPBW_4800m_HOT_LNA	Bacteria	Proteobacteria	Alphaproteobacteria	SAR11 clade	Deep 1
AAA283_L06_Cp_6.5_bact_NPBW_4800m_HOT_LNA	Bacteria	Proteobacteria	Alphaproteobacteria	SAR11 clade	Deep 1
AAA283_N17_Cp_5.9_bact_NPBW_4800m_HOT_LNA	Bacteria	Proteobacteria	Alphaproteobacteria	SAR11 clade	Deep 1
AAA283_O13_Cp_6.0_bact_NPBW_4800m_HOT_LNA	Bacteria	Proteobacteria	Alphaproteobacteria	SAR11 clade	Deep 1
AAA283_P08_Cp_8.4_bact_NPBW_4800m_HOT_LNA	Bacteria	Proteobacteria	Alphaproteobacteria	SAR11 clade	Deep 1
AAA284_G17_Cp_9.2_bact_NPDW_3000m_HOT_HNA	Bacteria	Proteobacteria	Alphaproteobacteria	SAR11 clade	Deep 1
AAA286_A07_Cp_11.1_bact_NPDW_3000m_HOT_LNA	Bacteria	Proteobacteria	Alphaproteobacteria	SAR11 clade	Deep 1
AAA286_B21_Cp_10.6_bact_NPDW_3000m_HOT_LNA	Bacteria	Proteobacteria	Alphaproteobacteria	SAR11 clade	Deep 1
AAA286_D21_Cp_10.5_bact_NPDW_3000m_HOT_LNA	Bacteria	Proteobacteria	Alphaproteobacteria	SAR11 clade	Deep 1
AAA286_F06_Cp_8.9_bact_NPDW_3000m_HOT_LNA	Bacteria	Proteobacteria	Alphaproteobacteria	SAR11 clade	Deep 1
AAA286_F22_Cp_10.3_bact_NPDW_3000m_HOT_LNA	Bacteria	Proteobacteria	Alphaproteobacteria	SAR11 clade	Deep 1
AAA286_G19_Cp_7.5_bact_NPDW_3000m_HOT_LNA	Bacteria	Proteobacteria	Alphaproteobacteria	SAR11 clade	Deep 1
AAA286_K17_Cp_11.5_bact_NPDW_3000m_HOT_LNA	Bacteria	Proteobacteria	Alphaproteobacteria	SAR11 clade	Deep 1
AAA286_N17_Cp_7.5_bact_NPDW_3000m_HOT_LNA	Bacteria	Proteobacteria	Alphaproteobacteria	SAR11 clade	Deep 1
AAA286_P23_Cp_10.4_bact_NPDW_3000m_HOT_LNA	Bacteria	Proteobacteria	Alphaproteobacteria	SAR11 clade	Deep 1
AAA287_I09_Cp_12.3_bact_NPDW_3000m_HOT_LNA	Bacteria	Proteobacteria	Alphaproteobacteria	SAR11 clade	Deep 1
AAA287_L02_Cp_8.0_bact_NPDW_3000m_HOT_LNA	Bacteria	Proteobacteria	Alphaproteobacteria	SAR11 clade	Deep 1
AAA282_G11_Cp_7.6_bact_NPBW_4800m_HOT_LNA	Bacteria	Proteobacteria	Alphaproteobacteria	SAR11 clade	Surface 2
AAA001_A10_Cp_00_bact_AIW_800m_SA_all	Bacteria	Proteobacteria	Alphaproteobacteria	SAR11 clade	Surface 1
AAA001_A15_Cp_00_bact_AIW_800m_SA_all	Bacteria	Proteobacteria	Alphaproteobacteria	SAR11 clade	Surface 1
AAA001_F11_Cp_00_bact_AIW_800m_SA_all	Bacteria	Proteobacteria	Alphaproteobacteria	SAR11 clade	Surface 1
AAA001_G11_Cp_00_bact_AIW_800m_SA_all	Bacteria	Proteobacteria	Alphaproteobacteria	SAR11 clade	Surface 1
AAA001_O14_Cp_00_bact_AIW_800m_SA_all	Bacteria	Proteobacteria	Alphaproteobacteria	SAR11 clade	Surface 1
AAA003_A09_Cp_00_bact_AIW_800m_SA_all	Bacteria	Proteobacteria	Alphaproteobacteria	SAR11 clade	Surface 1
AAA003_C02_Cp_00_bact_AIW_800m_SA_all	Bacteria	Proteobacteria	Alphaproteobacteria	SAR11 clade	Surface 1
AAA003_C09_Cp_00_bact_AIW_800m_SA_all	Bacteria	Proteobacteria	Alphaproteobacteria	SAR11 clade	Surface 1
AAA003_D04_Cp_00_bact_AIW_800m_SA_all	Bacteria	Proteobacteria	Alphaproteobacteria	SAR11 clade	Surface 1
AAA003_D05_Cp_00_bact_AIW_800m_SA_all	Bacteria	Proteobacteria	Alphaproteobacteria	SAR11 clade	Surface 1
AAA003_F16_Cp_00_bact_AIW_800m_SA_all	Bacteria	Proteobacteria	Alphaproteobacteria	SAR11 clade	Surface 1
AAA003_G19_Cp_00_bact_AIW_800m_SA_all	Bacteria	Proteobacteria	Alphaproteobacteria	SAR11 clade	Surface 1
AAA003_K03_Cp_00_bact_AIW_800m_SA_all	Bacteria	Proteobacteria	Alphaproteobacteria	SAR11 clade	Surface 1
AAA003_N21_Cp_00_bact_AIW_800m_SA_all	Bacteria	Proteobacteria	Alphaproteobacteria	SAR11 clade	Surface 1
AAA003_P18_Cp_00_bact_AIW_800m_SA_all	Bacteria	Proteobacteria	Alphaproteobacteria	SAR11 clade	Surface 1
AAA008_B11_Cp_8.2_bact_AIW_800m_SA_LNA	Bacteria	Proteobacteria	Alphaproteobacteria	SAR11 clade	Surface 1
AAA008_B13_Cp_13.6_bact_AIW_800m_SA_LNA	Bacteria	Proteobacteria	Alphaproteobacteria	SAR11 clade	Surface 1
AAA008_C06_Cp_8.3_bact_AIW_800m_SA_LNA	Bacteria	Proteobacteria	Alphaproteobacteria	SAR11 clade	Surface 1
AAA008_E21_Cp_7.1_bact_AIW_800m_SA_LNA	Bacteria	Proteobacteria	Alphaproteobacteria	SAR11 clade	Surface 1
AAA008_F23_Cp_5.9_bact_AIW_800m_SA_LNA	Bacteria	Proteobacteria	Alphaproteobacteria	SAR11 clade	Surface 1
AAA008_I09_Cp_8.1_bact_AIW_800m_SA_LNA	Bacteria	Proteobacteria	Alphaproteobacteria	SAR11 clade	Surface 1
AAA008_I22_Cp_7.0_bact_AIW_800m_SA_LNA	Bacteria	Proteobacteria	Alphaproteobacteria	SAR11 clade	Surface 1
AAA008_M17_Cp_6.6_bact_AIW_800m_SA_LNA	Bacteria	Proteobacteria	Alphaproteobacteria	SAR11 clade	Surface 1
AAA008_M19_Cp_9.6_bact_AIW_800m_SA_LNA	Bacteria	Proteobacteria	Alphaproteobacteria	SAR11 clade	Surface 1
AAA008_N04_Cp_11.4_bact_AIW_800m_SA_LNA	Bacteria	Proteobacteria	Alphaproteobacteria	SAR11 clade	Surface 1
AAA008_O16_Cp_6.4_bact_AIW_800m_SA_LNA	Bacteria	Proteobacteria	Alphaproteobacteria	SAR11 clade	Surface 1
AAA008_P10_Cp_7.7_bact_AIW_800m_SA_LNA	Bacteria	Proteobacteria	Alphaproteobacteria	SAR11 clade	Surface 1
AAA240_B21_Cp_5.7_bact_AAIW_770m_HOT_HNA	Bacteria	Proteobacteria	Alphaproteobacteria	SAR11 clade	Surface 1
AAA240_C16_Cp_7.4_bact_AAIW_770m_HOT_HNA	Bacteria	Proteobacteria	Alphaproteobacteria	SAR11 clade	Surface 1
AAA240_E13_Cp_6.9_bact_AAIW_770m_HOT_HNA_seq	Bacteria	Proteobacteria	Alphaproteobacteria	SAR11 clade	Surface 1
AAA282_A09_Cp_6.2_bact_NPBW_4800m_HOT_LNA	Bacteria	Proteobacteria	Alphaproteobacteria	SAR11 clade	Surface 1
AAA282_B23_Cp_5.6_bact_NPBW_4800m_HOT_LNA	Bacteria	Proteobacteria	Alphaproteobacteria	SAR11 clade	Surface 1
AAA282_E04_Cp_7.3_bact_NPBW_4800m_HOT_LNA	Bacteria	Proteobacteria	Alphaproteobacteria	SAR11 clade	Surface 1
AAA282_F09_Cp_5.7_bact_NPBW_4800m_HOT_LNA	Bacteria	Proteobacteria	Alphaproteobacteria	SAR11 clade	Surface 1
AAA282_F13_Cp_6.2_bact_NPBW_4800m_HOT_LNA	Bacteria	Proteobacteria	Alphaproteobacteria	SAR11 clade	Surface 1
AAA282_K04_Cp_7.2_bact_NPBW_4800m_HOT_LNA	Bacteria	Proteobacteria	Alphaproteobacteria	SAR11 clade	Surface 1
AAA282_M21_Cp_8.4_bact_NPBW_4800m_HOT_LNA	Bacteria	Proteobacteria	Alphaproteobacteria	SAR11 clade	Surface 1
AAA282_O06_Cp_7.5_bact_NPBW_4800m_HOT_LNA	Bacteria	Proteobacteria	Alphaproteobacteria	SAR11 clade	Surface 1
AAA283_B19_Cp_5.5_bact_NPBW_4800m_HOT_LNA	Bacteria	Proteobacteria	Alphaproteobacteria	SAR11 clade	Surface 1
AAA283_E19_Cp_6.3_bact_NPBW_4800m_HOT_LNA	Bacteria	Proteobacteria	Alphaproteobacteria	SAR11 clade	Surface 1
AAA283_G16_Cp_5.7_bact_NPBW_4800m_HOT_LNA	Bacteria	Proteobacteria	Alphaproteobacteria	SAR11 clade	Surface 1
AAA283_K02_Cp_8.2_bact_NPBW_4800m_HOT_LNA	Bacteria	Proteobacteria	Alphaproteobacteria	SAR11 clade	Surface 1
AAA283_K14_Cp_5.8_bact_NPBW_4800m_HOT_LNA	Bacteria	Proteobacteria	Alphaproteobacteria	SAR11 clade	Surface 1
AAA283_K21_Cp_5.8_bact_NPBW_4800m_HOT_LNA	Bacteria	Proteobacteria	Alphaproteobacteria	SAR11 clade	Surface 1
AAA286_A08_Cp_11.3_bact_NPDW_3000m_HOT_LNA	Bacteria	Proteobacteria	Alphaproteobacteria	SAR11 clade	Surface 1
AAA286_B05_Cp_8.7_bact_NPDW_3000m_HOT_LNA	Bacteria	Proteobacteria	Alphaproteobacteria	SAR11 clade	Surface 1
AAA286_B15_Cp_12.2_bact_NPDW_3000m_HOT_LNA	Bacteria	Proteobacteria	Alphaproteobacteria	SAR11 clade	Surface 1
AAA286_D14_Cp_10.0_bact_NPDW_3000m_HOT_LNA	Bacteria	Proteobacteria	Alphaproteobacteria	SAR11 clade	Surface 1
AAA286_F15_Cp_8.9_bact_NPDW_3000m_HOT_LNA	Bacteria	Proteobacteria	Alphaproteobacteria	SAR11 clade	Surface 1
AAA286_K18_Cp_13.0_bact_NPDW_3000m_HOT_LNA	Bacteria	Proteobacteria	Alphaproteobacteria	SAR11 clade	Surface 1
AAA286_M18_Cp_10.0_bact_NPDW_3000m_HOT_LNA	Bacteria	Proteobacteria	Alphaproteobacteria	SAR11 clade	Surface 1
AAA286_N22_Cp_8.9_bact_NPDW_3000m_HOT_LNA	Bacteria	Proteobacteria	Alphaproteobacteria	SAR11 clade	Surface 1
AAA286_O14_Cp_8.5_bact_NPDW_3000m_HOT_LNA	Bacteria	Proteobacteria	Alphaproteobacteria	SAR11 clade	Surface 1
AAA287_G09_Cp_7.4_bact_NPDW_3000m_HOT_LNA	Bacteria	Proteobacteria	Alphaproteobacteria	SAR11 clade	Surface 1
AAA287_I10_Cp_8.8_bact_NPDW_3000m_HOT_LNA	Bacteria	Proteobacteria	Alphaproteobacteria	SAR11 clade	Surface 1
AAA287_I19_Cp_6.7_bact_NPDW_3000m_HOT_LNA	Bacteria	Proteobacteria	Alphaproteobacteria	SAR11 clade	Surface 1
AAA287_K09_Cp_7.9_bact_NPDW_3000m_HOT_LNA	Bacteria	Proteobacteria	Alphaproteobacteria	SAR11 clade	Surface 1
AAA287_K21_Cp_7.7_bact_NPDW_3000m_HOT_LNA	Bacteria	Proteobacteria	Alphaproteobacteria	SAR11 clade	Surface 1
AAA287_L23_Cp_7.6_bact_NPDW_3000m_HOT_LNA	Bacteria	Proteobacteria	Alphaproteobacteria	SAR11 clade	Surface 1
AAA287_M02_Cp_6.8_bact_NPDW_3000m_HOT_LNA	Bacteria	Proteobacteria	Alphaproteobacteria	SAR11 clade	Surface 1
AAA287_M04_Cp_6.8_bact_NPDW_3000m_HOT_LNA	Bacteria	Proteobacteria	Alphaproteobacteria	SAR11 clade	Surface 1
AAA287_M08_Cp_7.7_bact_NPDW_3000m_HOT_LNA_seq	Bacteria	Proteobacteria	Alphaproteobacteria	SAR11 clade	Surface 1
AAA287_N17_Cp_11.4_bact_NPDW_3000m_HOT_LNA	Bacteria	Proteobacteria	Alphaproteobacteria	SAR11 clade	Surface 1
AAA287_O10_Cp_7.7_bact_NPDW_3000m_HOT_LNA	Bacteria	Proteobacteria	Alphaproteobacteria	SAR11 clade	Surface 1
AAA287_P09_Cp_6.7_bact_NPDW_3000m_HOT_LNA	Bacteria	Proteobacteria	Alphaproteobacteria	SAR11 clade	Surface 1
AAA287_P11_Cp_6.7_bact_NPDW_3000m_HOT_LNA	Bacteria	Proteobacteria	Alphaproteobacteria	SAR11 clade	Surface 1
AAA001_F06_Cp_00_bact_AIW_800m_SA_all	Bacteria	Proteobacteria	Alphaproteobacteria	Unknown Alphaproteobacteria order
AAA285_E04_Cp_7.3_bact_NPDW_3000m_HOT_HNA	Bacteria	Proteobacteria	Alphaproteobacteria	Unknown Alphaproteobacteria order
AAA242_L10_Cp_7.4_bact_NPBW_4800m_HOT_HNA	Bacteria	Proteobacteria	Gammaproteobacteria
AAA242_O11_Cp_6.2_bact_NPBW_4800m_HOT_HNA	Bacteria	Proteobacteria	Gammaproteobacteria
AAA003_J03_Cp_00_bact_AIW_800m_SA_all_seq	Bacteria	Proteobacteria	Gammaproteobacteria	E01-9C-26 marine group
AAA003_L20_Cp_00_bact_AIW_800m_SA_all_seq	Bacteria	Proteobacteria	Gammaproteobacteria	E01-9C-26 marine group
AAA007_C15_Cp_13.0_bact_AIW_800m_SA_HNA	Bacteria	Proteobacteria	Gammaproteobacteria	E01-9C-26 marine group
AAA007_D04_Cp_10.8_bact_AIW_800m_SA_HNA	Bacteria	Proteobacteria	Gammaproteobacteria	E01-9C-26 marine group
AAA007_E03_Cp_13.0_bact_AIW_800m_SA_HNA	Bacteria	Proteobacteria	Gammaproteobacteria	E01-9C-26 marine group
AAA007_E08_Cp_10.8_bact_AIW_800m_SA_HNA_seq	Bacteria	Proteobacteria	Gammaproteobacteria	E01-9C-26 marine group
AAA240_A02_Cp_9.7_bact_AAIW_770m_HOT_HNA	Bacteria	Proteobacteria	Gammaproteobacteria	E01-9C-26 marine group
AAA240_C06_Cp_10.2_bact_AAIW_770m_HOT_HNA	Bacteria	Proteobacteria	Gammaproteobacteria	E01-9C-26 marine group
AAA240_C07_Cp_12.0_bact_AAIW_770m_HOT_HNA	Bacteria	Proteobacteria	Gammaproteobacteria	E01-9C-26 marine group
AAA240_C10_Cp_10.9_bact_AAIW_770m_HOT_HNA_seq	Bacteria	Proteobacteria	Gammaproteobacteria	E01-9C-26 marine group
AAA240_C17_Cp_10.8_bact_AAIW_770m_HOT_HNA_seq	Bacteria	Proteobacteria	Gammaproteobacteria	E01-9C-26 marine group
AAA240_G13_Cp_10.9_bact_AAIW_770m_HOT_HNA	Bacteria	Proteobacteria	Gammaproteobacteria	E01-9C-26 marine group
AAA240_I03_Cp_10.3_bact_AAIW_770m_HOT_HNA_seq	Bacteria	Proteobacteria	Gammaproteobacteria	E01-9C-26 marine group
AAA240_I21_Cp_8.9_bact_AAIW_770m_HOT_HNA	Bacteria	Proteobacteria	Gammaproteobacteria	E01-9C-26 marine group
AAA240_L21_Cp_7.7_bact_AAIW_770m_HOT_HNA_seq	Bacteria	Proteobacteria	Gammaproteobacteria	E01-9C-26 marine group
AAA240_O06_Cp_11.3_bact_AAIW_770m_HOT_HNA	Bacteria	Proteobacteria	Gammaproteobacteria	E01-9C-26 marine group
AAA240_P20_Cp_7.8_bact_AAIW_770m_HOT_HNA	Bacteria	Proteobacteria	Gammaproteobacteria	E01-9C-26 marine group
AAA286_K03_Cp_12.1_bact_NPDW_3000m_HOT_LNA	Bacteria	Proteobacteria	Gammaproteobacteria	E01-9C-26 marine group
AAA287_K08_Cp_8.0_bact_NPDW_3000m_HOT_LNA_seq	Bacteria	Proteobacteria	Gammaproteobacteria	E01-9C-26 marine group
AAA003_M16_Cp_00_bact_AIW_800m_SA_all	Bacteria	Proteobacteria	Gammaproteobacteria	KI89A clade
AAA007_N20_Cp_10.5_bact_AIW_800m_SA_HNA	Bacteria	Proteobacteria	Gammaproteobacteria	KI89A clade
AAA283_O17_Cp_8.3_bact_NPBW_4800m_HOT_LNA	Bacteria	Proteobacteria	Gammaproteobacteria	Chromatiales	Granulosicoccaceae	Granulosicoccus
AAA240_B14_Cp_10.0_bact_AAIW_770m_HOT_HNA	Bacteria	Proteobacteria	Gammaproteobacteria	Salinisphaerales	Salinisphaeraceae	ZD0417 marine group
AAA240_I14_Cp_7.0_bact_AAIW_770m_HOT_HNA	Bacteria	Proteobacteria	Gammaproteobacteria	Salinisphaerales	Salinisphaeraceae	ZD0417 marine group
AAA284_P15_Cp_9.0_bact_NPDW_3000m_HOT_HNA	Bacteria	Proteobacteria	Gammaproteobacteria	Salinisphaerales	Salinisphaeraceae	ZD0417 marine group
AAA286_G02_Cp_10.7_bact_NPDW_3000m_HOT_LNA	Bacteria	Proteobacteria	Gammaproteobacteria	Salinisphaerales	Salinisphaeraceae	ZD0417 marine group
AAA286_M23_Cp_11.2_bact_NPDW_3000m_HOT_LNA	Bacteria	Proteobacteria	Gammaproteobacteria	Salinisphaerales	Salinisphaeraceae	ZD0417 marine group
AAA001_B15_Cp_00_bact_AIW_800m_SA_all_seq	Bacteria	Proteobacteria	Gammaproteobacteria	Oceanospirillales
AAA007_O20_Cp_7.8_bact_AIW_800m_SA_HNA_seq	Bacteria	Proteobacteria	Gammaproteobacteria	Oceanospirillales
AAA008_C17_Cp_7.0_bact_AIW_800m_SA_LNA	Bacteria	Proteobacteria	Gammaproteobacteria	Oceanospirillales
AAA008_P05_Cp_7.6_bact_AIW_800m_SA_LNA	Bacteria	Proteobacteria	Gammaproteobacteria	Oceanospirillales
AAA240_I17_Cp_6.9_bact_AAIW_770m_HOT_HNA	Bacteria	Proteobacteria	Gammaproteobacteria	Oceanospirillales
AAA282_I10_Cp_8.2_bact_NPBW_4800m_HOT_LNA	Bacteria	Proteobacteria	Gammaproteobacteria	Oceanospirillales
AAA283_E16_Cp_8.3_bact_NPBW_4800m_HOT_LNA	Bacteria	Proteobacteria	Gammaproteobacteria	Oceanospirillales
AAA286_K09_Cp_10.1_bact_NPDW_3000m_HOT_LNA	Bacteria	Proteobacteria	Gammaproteobacteria	Oceanospirillales
AAA001_E15_Cp_00_bact_AIW_800m_SA_all	Bacteria	Proteobacteria	Gammaproteobacteria	Oceanospirillales	ZD0405
AAA003_A13_Cp_00_bact_AIW_800m_SA_all	Bacteria	Proteobacteria	Gammaproteobacteria	Oceanospirillales	ZD0405
AAA003_L03_Cp_00_bact_AIW_800m_SA_all	Bacteria	Proteobacteria	Gammaproteobacteria	Oceanospirillales	ZD0405
AAA007_N18_Cp_8.4_bact_AIW_800m_SA_HNA	Bacteria	Proteobacteria	Gammaproteobacteria	Oceanospirillales	ZD0405
AAA008_I23_Cp_6.8_bact_AIW_800m_SA_LNA	Bacteria	Proteobacteria	Gammaproteobacteria	Oceanospirillales	ZD0405
AAA008_O02_Cp_6.8_bact_AIW_800m_SA_LNA	Bacteria	Proteobacteria	Gammaproteobacteria	Oceanospirillales	ZD0405
AAA008_P15_Cp_6.6_bact_AIW_800m_SA_LNA_seq	Bacteria	Proteobacteria	Gammaproteobacteria	Oceanospirillales	ZD0405
AAA240_F04_Cp_8.8_bact_AAIW_770m_HOT_HNA	Bacteria	Proteobacteria	Gammaproteobacteria	Oceanospirillales	ZD0405
AAA240_K14_Cp_7.2_bact_AAIW_770m_HOT_HNA	Bacteria	Proteobacteria	Gammaproteobacteria	Oceanospirillales	ZD0405
AAA240_P07_Cp_7.2_bact_AAIW_770m_HOT_HNA	Bacteria	Proteobacteria	Gammaproteobacteria	Oceanospirillales	ZD0405
AAA240_P15_Cp_6.9_bact_AAIW_770m_HOT_HNA	Bacteria	Proteobacteria	Gammaproteobacteria	Oceanospirillales	ZD0405
AAA001_M20_Cp_00_bact_AIW_800m_SA_all	Bacteria	Proteobacteria	Gammaproteobacteria	Oceanospirillales	Oceanospirillaceae	Pseudospirillum
AAA007_K19_Cp_7.7_bact_AIW_800m_SA_HNA	Bacteria	Proteobacteria	Gammaproteobacteria	Oceanospirillales	Oceanospirillaceae	Pseudospirillum
AAA007_K21_Cp_8.5_bact_AIW_800m_SA_HNA	Bacteria	Proteobacteria	Gammaproteobacteria	Oceanospirillales	Oceanospirillaceae	Pseudospirillum
AAA240_O13_Cp_7.7_bact_AAIW_770m_HOT_HNA	Bacteria	Proteobacteria	Gammaproteobacteria	Oceanospirillales	Oceanospirillaceae	Pseudospirillum
AAA282_J22_Cp_7.7_bact_NPBW_4800m_HOT_LNA	Bacteria	Proteobacteria	Gammaproteobacteria	Oceanospirillales	SAR86 clade
AAA003_E02_Cp_00_bact_AIW_800m_SA_all_seq	Bacteria	Proteobacteria	Gammaproteobacteria	Oceanospirillales	Unknown Oceanospirillales family
AAA008_C14_Cp_9.7_bact_AIW_800m_SA_LNA	Bacteria	Proteobacteria	Gammaproteobacteria	Oceanospirillales	Unknown Oceanospirillales family
AAA003_F05_Cp_00_bact_AIW_800m_SA_all	Bacteria	Proteobacteria	Gammaproteobacteria	Xanthomonadales	Sinobacteraceae
AAA007_P21_Cp_7.3_bact_AIW_800m_SA_HNA	Bacteria	Proteobacteria	Gammaproteobacteria	Xanthomonadales	Sinobacteraceae
AAA242_O19_Cp_9.9_bact_NPBW_4800m_HOT_HNA	Bacteria	Proteobacteria	Gammaproteobacteria	Xanthomonadales	Sinobacteraceae	JTB255 marine benthic group
AB-606_N05_Cp_14.4_bact_NADW_3200m_SA_all	Bacteria	PAUC34f
AB-629_G20_Cp_11.2_bact_OMZ_511m_NA_all	Bacteria	PAUC34f
AAA288_M07_Cp_12.2_bact_AAIW_770m_HOT_LNA	Bacteria	Gemmatimonadetes	Gemmatimonadetes (class)	BD2-11 terrestrial group
AB-606_K09_Cp_15.3_bact_NADW_3200m_SA_all	Bacteria	Gemmatimonadetes	Gemmatimonadetes (class)	BD2-11 terrestrial group
AB-629_I08_Cp_10.0_bact_OMZ_511m_NA_all_seq	Bacteria	Gemmatimonadetes	Gemmatimonadetes (class)	BD2-11 terrestrial group
AB-554_L07_Cp_13.7_bact_MDW_3000m_MED_all	Bacteria	Lentisphaerae	Lentisphaeria	WCHB1-41
AB-219_C22_Cp_14.0_bact_MDW_3000m_MED_LNA_seq	Bacteria	Nitrospirae	Nitrospira	Nitrospirales	Nitrospiraceae	Unknown Nitrospiraceae genus
AAA288_D02_Cp_7.1_bact_AAIW_770m_HOT_LNA_seq	Bacteria	SAR406 clade(Marine group A)
AAA288_E05_Cp_6.8_bact_AAIW_770m_HOT_LNA_seq	Bacteria	SAR406 clade(Marine group A)
AAA288_E21_Cp_6.3_bact_AAIW_770m_HOT_LNA_seq	Bacteria	SAR406 clade(Marine group A)
AAA290_E15_Cp_8.4_bact_OMZ_200m_HOT_HNA	Bacteria	SAR406 clade(Marine group A)
AAA292_O06_Cp_8.4_bact_OMZ_200m_HOT_LNA	Bacteria	SAR406 clade(Marine group A)
AB-606_L02_Cp_6.4_bact_NADW_3200m_SA_all	Bacteria	SAR406 clade(Marine group A)
AB-606_O03_Cp_7.1_bact_NADW_3200m_SA_all	Bacteria	SAR406 clade(Marine group A)
AB-629_J13_Cp_5.8_bact_OMZ_511m_NA_all_seq	Bacteria	SAR406 clade(Marine group A)
AB-629_J14_Cp_7.1_bact_OMZ_511m_NA_all	Bacteria	SAR406 clade(Marine group A)
AB-629_J21_Cp_9.0_bact_OMZ_511m_NA_all	Bacteria	SAR406 clade(Marine group A)
AB-606_A23_Cp_11.4_bact_NADW_3200m_SA_all	Bacteria	Verrucomicrobia	OPB35 soil group
AAA292_I05_Cp_8.3_bact_OMZ_200m_HOT_LNA	Bacteria	Verrucomicrobia	Verrucomicrobiae	Verrucomicrobiales	DEV007
AAA292_C05_Cp_8.6_bact_OMZ_200m_HOT_LNA	Bacteria	Verrucomicrobia	Opitutae	MB11C04 marine group
AB-629_K23_Cp_9.0_bact_OMZ_511m_NA_all	Bacteria	Verrucomicrobia	Opitutae	MB11C04 marine group
AAA292_P20_Cp_10.6_bact_OMZ_200m_HOT_LNA	Bacteria	Firmicutes	Bacilli	Bacillales	Bacillaceae	Bacillus (Bacillaceae)
AAA292_A19_Cp_6.5_bact_OMZ_200m_HOT_LNA_seq	Bacteria	Actinobacteria	Acidimicrobiia	Acidimicrobiales	Sva0996 marine group
AAA292_B02_Cp_6.8_bact_OMZ_200m_HOT_LNA	Bacteria	Bacteroidetes	Sphingobacteria	Unknown Sphingobacteria order
AAA290_O23_Cp_10.4_bact_OMZ_200m_HOT_HNA	Bacteria	Bacteroidetes	Flavobacteria	Flavobacteriales	NS9 marine group
AB-606_L05_Cp_6.2_bact_NADW_3200m_SA_all	Bacteria	Bacteroidetes	Flavobacteria	Flavobacteriales	Flavobacteriaceae	Joostella
AB-214_C07_Cp_11.8_bact_MDW_3000m_MED_HNA	Bacteria	Bacteroidetes	Flavobacteria	Flavobacteriales	Flavobacteriaceae	Zunongwangia
AB-215_J14_Cp_11.4_bact_MDW_3000m_MED_HNA	Bacteria	Bacteroidetes	Flavobacteria	Flavobacteriales	Flavobacteriaceae	Zunongwangia
AB-554_K13_Cp_9.2_bact_MDW_3000m_MED_all	Bacteria	Bacteroidetes	Flavobacteria	Flavobacteriales	Flavobacteriaceae	Zunongwangia
AB-554_I15_Cp_10.3_bact_MDW_3000m_MED_all	Bacteria	Bacteroidetes	Flavobacteria	Flavobacteriales	Flavobacteriaceae	Muricauda
AB-214_D21_Cp_11.8_bact_MDW_3000m_MED_HNA	Bacteria	Bacteroidetes	Flavobacteria	Flavobacteriales	Flavobacteriaceae	Leeuwenhoekiella
AB-214_F06_Cp_10.2_bact_MDW_3000m_MED_HNA	Bacteria	Bacteroidetes	Flavobacteria	Flavobacteriales	Flavobacteriaceae	Leeuwenhoekiella
AB-214_F13_Cp_11.0_bact_MDW_3000m_MED_HNA	Bacteria	Bacteroidetes	Flavobacteria	Flavobacteriales	Flavobacteriaceae	Leeuwenhoekiella
AB-214_F16_Cp_10.0_bact_MDW_3000m_MED_HNA	Bacteria	Bacteroidetes	Flavobacteria	Flavobacteriales	Flavobacteriaceae	Leeuwenhoekiella
AB-214_F23_Cp_10.6_bact_MDW_3000m_MED_HNA	Bacteria	Bacteroidetes	Flavobacteria	Flavobacteriales	Flavobacteriaceae	Leeuwenhoekiella
AB-214_G09_Cp_11.4_bact_MDW_3000m_MED_HNA	Bacteria	Bacteroidetes	Flavobacteria	Flavobacteriales	Flavobacteriaceae	Leeuwenhoekiella
AB-214_K14_Cp_9.7_bact_MDW_3000m_MED_HNA	Bacteria	Bacteroidetes	Flavobacteria	Flavobacteriales	Flavobacteriaceae	Leeuwenhoekiella
AB-214_L10_Cp_12.8_bact_MDW_3000m_MED_HNA	Bacteria	Bacteroidetes	Flavobacteria	Flavobacteriales	Flavobacteriaceae	Leeuwenhoekiella
AB-214_N22_Cp_11.6_bact_MDW_3000m_MED_HNA	Bacteria	Bacteroidetes	Flavobacteria	Flavobacteriales	Flavobacteriaceae	Leeuwenhoekiella
AB-214_O18_Cp_12.2_bact_MDW_3000m_MED_HNA	Bacteria	Bacteroidetes	Flavobacteria	Flavobacteriales	Flavobacteriaceae	Leeuwenhoekiella
AB-214_P05_Cp_13.0_bact_MDW_3000m_MED_HNA	Bacteria	Bacteroidetes	Flavobacteria	Flavobacteriales	Flavobacteriaceae	Leeuwenhoekiella
AB-214_P13_Cp_10.7_bact_MDW_3000m_MED_HNA	Bacteria	Bacteroidetes	Flavobacteria	Flavobacteriales	Flavobacteriaceae	Leeuwenhoekiella
AB-215_B18_Cp_14.7_bact_MDW_3000m_MED_HNA	Bacteria	Bacteroidetes	Flavobacteria	Flavobacteriales	Flavobacteriaceae	Leeuwenhoekiella
AB-215_C19_Cp_14.7_bact_MDW_3000m_MED_HNA	Bacteria	Bacteroidetes	Flavobacteria	Flavobacteriales	Flavobacteriaceae	Leeuwenhoekiella
AB-215_K22_Cp_14.7_bact_MDW_3000m_MED_HNA	Bacteria	Bacteroidetes	Flavobacteria	Flavobacteriales	Flavobacteriaceae	Leeuwenhoekiella
AB-215_L17_Cp_14.7_bact_MDW_3000m_MED_HNA	Bacteria	Bacteroidetes	Flavobacteria	Flavobacteriales	Flavobacteriaceae	Leeuwenhoekiella
AB-215_N08_Cp_14.7_bact_MDW_3000m_MED_HNA	Bacteria	Bacteroidetes	Flavobacteria	Flavobacteriales	Flavobacteriaceae	Leeuwenhoekiella
AB-215_N13_Cp_13.9_bact_MDW_3000m_MED_HNA	Bacteria	Bacteroidetes	Flavobacteria	Flavobacteriales	Flavobacteriaceae	Leeuwenhoekiella
AB-215_N22_Cp_14.7_bact_MDW_3000m_MED_HNA	Bacteria	Bacteroidetes	Flavobacteria	Flavobacteriales	Flavobacteriaceae	Leeuwenhoekiella
AB-215_O18_Cp_12.6_bact_MDW_3000m_MED_HNA	Bacteria	Bacteroidetes	Flavobacteria	Flavobacteriales	Flavobacteriaceae	Leeuwenhoekiella
AB-554_D13_Cp_13.7_bact_MDW_3000m_MED_all	Bacteria	Bacteroidetes	Flavobacteria	Flavobacteriales	Flavobacteriaceae	Leeuwenhoekiella
AB-554_F08_Cp_13.7_bact_MDW_3000m_MED_all	Bacteria	Bacteroidetes	Flavobacteria	Flavobacteriales	Flavobacteriaceae	Leeuwenhoekiella
AB-554_K05_Cp_13.7_bact_MDW_3000m_MED_all	Bacteria	Bacteroidetes	Flavobacteria	Flavobacteriales	Flavobacteriaceae	Leeuwenhoekiella
AB-554_M17_Cp_10.7_bact_MDW_3000m_MED_all	Bacteria	Bacteroidetes	Flavobacteria	Flavobacteriales	Flavobacteriaceae	Leeuwenhoekiella
AB-554_N16_Cp_13.7_bact_MDW_3000m_MED_all	Bacteria	Bacteroidetes	Flavobacteria	Flavobacteriales	Flavobacteriaceae	Leeuwenhoekiella
AB-554_P11_Cp_11.5_bact_MDW_3000m_MED_all	Bacteria	Bacteroidetes	Flavobacteria	Flavobacteriales	Flavobacteriaceae	Leeuwenhoekiella
AAA288_M09_Cp_7.3_bact_AAIW_770m_HOT_LNA	Bacteria	Bacteroidetes	Flavobacteria	Flavobacteriales	Flavobacteriaceae	NS2b marine group
AAA290_I02_Cp_8.9_bact_OMZ_200m_HOT_HNA	Bacteria	Bacteroidetes	Flavobacteria	Flavobacteriales	Flavobacteriaceae	NS5 marine group
AB-629_J15_Cp_5.2_bact_OMZ_511m_NA_all	Bacteria	Bacteroidetes	Flavobacteria	Flavobacteriales	Flavobacteriaceae	NS5 marine group
AAA290_L06_Cp_9.6_bact_OMZ_200m_HOT_HNA	Bacteria	Chloroflexi	Chloroflexi Subdivision 5 - SAR202 clade
AAA290_N06_Cp_10.7_bact_OMZ_200m_HOT_HNA	Bacteria	Chloroflexi	Chloroflexi Subdivision 5 - SAR202 clade
AAA290_N22_Cp_11.1_bact_OMZ_200m_HOT_HNA	Bacteria	Chloroflexi	Chloroflexi Subdivision 5 - SAR202 clade
AAA292_A07_Cp_9.6_bact_OMZ_200m_HOT_LNA	Bacteria	Chloroflexi	Chloroflexi Subdivision 5 - SAR202 clade
AAA292_A22_Cp_7.3_bact_OMZ_200m_HOT_LNA	Bacteria	Chloroflexi	Chloroflexi Subdivision 5 - SAR202 clade
AAA292_C03_Cp_6.3_bact_OMZ_200m_HOT_LNA	Bacteria	Chloroflexi	Chloroflexi Subdivision 5 - SAR202 clade
AAA292_C14_Cp_8.0_bact_OMZ_200m_HOT_LNA	Bacteria	Chloroflexi	Chloroflexi Subdivision 5 - SAR202 clade
AAA292_F15_Cp_9.7_bact_OMZ_200m_HOT_LNA	Bacteria	Chloroflexi	Chloroflexi Subdivision 5 - SAR202 clade
AAA292_I04_Cp_7.5_bact_OMZ_200m_HOT_LNA	Bacteria	Chloroflexi	Chloroflexi Subdivision 5 - SAR202 clade
AAA292_I09_Cp_6.2_bact_OMZ_200m_HOT_LNA	Bacteria	Chloroflexi	Chloroflexi Subdivision 5 - SAR202 clade
AAA292_K04_Cp_7.3_bact_OMZ_200m_HOT_LNA	Bacteria	Chloroflexi	Chloroflexi Subdivision 5 - SAR202 clade
AB-606_B07_Cp_9.8_bact_NADW_3200m_SA_all	Bacteria	Chloroflexi	Chloroflexi Subdivision 5 - SAR202 clade
AB-606_D05_Cp_15.3_bact_NADW_3200m_SA_all	Bacteria	Chloroflexi	Chloroflexi Subdivision 5 - SAR202 clade
AB-606_D19_Cp_15.3_bact_NADW_3200m_SA_all	Bacteria	Chloroflexi	Chloroflexi Subdivision 5 - SAR202 clade
AB-606_D23_Cp_8.5_bact_NADW_3200m_SA_all	Bacteria	Chloroflexi	Chloroflexi Subdivision 5 - SAR202 clade
AB-606_F07_Cp_14.8_bact_NADW_3200m_SA_all	Bacteria	Chloroflexi	Chloroflexi Subdivision 5 - SAR202 clade
AB-606_J09_Cp_14.5_bact_NADW_3200m_SA_all	Bacteria	Chloroflexi	Chloroflexi Subdivision 5 - SAR202 clade
AB-606_J14_Cp_13.6_bact_NADW_3200m_SA_all	Bacteria	Chloroflexi	Chloroflexi Subdivision 5 - SAR202 clade
AB-606_N07_Cp_12.8_bact_NADW_3200m_SA_all	Bacteria	Chloroflexi	Chloroflexi Subdivision 5 - SAR202 clade
AB-629_K15_Cp_6.7_bact_OMZ_511m_NA_all	Bacteria	Chloroflexi	Chloroflexi Subdivision 5 - SAR202 clade
AB-629_L07_Cp_5.4_bact_OMZ_511m_NA_all	Bacteria	Chloroflexi	Chloroflexi Subdivision 5 - SAR202 clade
AB-629_P11_Cp_12.4_bact_OMZ_511m_NA_all	Bacteria	Chloroflexi	Chloroflexi Subdivision 5 - SAR202 clade
AB-629_P13_Cp_6.2_bact_OMZ_511m_NA_all_seq	Bacteria	Chloroflexi	Chloroflexi Subdivision 5 - SAR202 clade
AAA290_P23_Cp_8.0_bact_OMZ_200m_HOT_HNA	Bacteria	Planctomycetes	Pla3 lineage
AB-629_L23_Cp_10.7_bact_OMZ_511m_NA_all	Bacteria	Planctomycetes	Pla3 lineage
AAA290_K08_Cp_7.8_bact_OMZ_200m_HOT_HNA_seq	Bacteria	Planctomycetes	Phycisphaerae	Phycisphaerales	Unknown Phycisphaerales family
AB-606_G09_Cp_11.3_bact_NADW_3200m_SA_all	Bacteria	Planctomycetes	Phycisphaerae	Phycisphaerales	Unknown Phycisphaerales family
AB-606_K05_Cp_15.3_bact_NADW_3200m_SA_all	Bacteria	Planctomycetes	Planctomycetacia	Planctomycetales	Unknown Planctomycetales family
AB-606_L16_Cp_13.2_bact_NADW_3200m_SA_all	Bacteria	Planctomycetes	Planctomycetacia	Planctomycetales	Unknown Planctomycetales family
AB-629_O15_Cp_7.5_bact_OMZ_511m_NA_all_seq	Bacteria	Planctomycetes	Planctomycetacia	Planctomycetales	Unknown Planctomycetales family
AB-214_B13_Cp_15.9_bact_MDW_3000m_MED_HNA	Bacteria	Acidobacteria	Acidobacteria (class)	Acidobacteria group 11
AB-214_D18_Cp_15.9_bact_MDW_3000m_MED_HNA	Bacteria	Acidobacteria	Acidobacteria (class)	Acidobacteria group 21 (BPC102)
AB-554_P04_Cp_13.7_bact_MDW_3000m_MED_all	Bacteria	Acidobacteria	Acidobacteria (class)	Acidobacteria group 21 (BPC102)
AAA290_K23_Cp_6.2_bact_OMZ_200m_HOT_HNA	Bacteria	Acidobacteria	Acidobacteria (class)	Acidobacteria group 6 (DA023)
AB-214_J21_Cp_15.9_bact_MDW_3000m_MED_HNA	Bacteria	Acidobacteria	Acidobacteria (class)	Acidobacteria group 6 (DA023)
AAA288_P03_Cp_5.8_bact_AAIW_770m_HOT_LNA	Bacteria	Proteobacteria	JTB23
AAA288_C20_Cp_6.2_bact_AAIW_770m_HOT_LNA	Bacteria	Proteobacteria	Deltaproteobacteria	Nitrospinaceae order incertae sedis	Nitrospinaceae	Nitrospina
AAA288_E23_Cp_5.7_bact_AAIW_770m_HOT_LNA	Bacteria	Proteobacteria	Deltaproteobacteria	Nitrospinaceae order incertae sedis	Nitrospinaceae	Nitrospina
AAA288_L15_Cp_7.7_bact_AAIW_770m_HOT_LNA	Bacteria	Proteobacteria	Deltaproteobacteria	Nitrospinaceae order incertae sedis	Nitrospinaceae	Nitrospina
AAA288_L16_Cp_6.7_bact_AAIW_770m_HOT_LNA_seq	Bacteria	Proteobacteria	Deltaproteobacteria	Nitrospinaceae order incertae sedis	Nitrospinaceae	Nitrospina
AAA288_O16_Cp_6.2_bact_AAIW_770m_HOT_LNA	Bacteria	Proteobacteria	Deltaproteobacteria	Nitrospinaceae order incertae sedis	Nitrospinaceae	Nitrospina
AAA292_M17_Cp_7.2_bact_OMZ_200m_HOT_LNA	Bacteria	Proteobacteria	Deltaproteobacteria	Nitrospinaceae order incertae sedis	Nitrospinaceae	Nitrospina
AAA292_O23_Cp_6.7_bact_OMZ_200m_HOT_LNA	Bacteria	Proteobacteria	Deltaproteobacteria	Nitrospinaceae order incertae sedis	Nitrospinaceae	Nitrospina
AAA292_P03_Cp_7.7_bact_OMZ_200m_HOT_LNA	Bacteria	Proteobacteria	Deltaproteobacteria	Nitrospinaceae order incertae sedis	Nitrospinaceae	Nitrospina
AAA292_P04_Cp_7.0_bact_OMZ_200m_HOT_LNA	Bacteria	Proteobacteria	Deltaproteobacteria	Nitrospinaceae order incertae sedis	Nitrospinaceae	Nitrospina
AB-629_J16_Cp_6.7_bact_OMZ_511m_NA_all	Bacteria	Proteobacteria	Deltaproteobacteria	Nitrospinaceae order incertae sedis	Nitrospinaceae	Nitrospina
AB-629_L06_Cp_8.7_bact_OMZ_511m_NA_all	Bacteria	Proteobacteria	Deltaproteobacteria	Nitrospinaceae order incertae sedis	Nitrospinaceae	Nitrospina
AB-629_L15_Cp_7.8_bact_OMZ_511m_NA_all	Bacteria	Proteobacteria	Deltaproteobacteria	Nitrospinaceae order incertae sedis	Nitrospinaceae	Nitrospina
AB-629_O23_Cp_5.5_bact_OMZ_511m_NA_all	Bacteria	Proteobacteria	Deltaproteobacteria	Nitrospinaceae order incertae sedis	Nitrospinaceae	Nitrospina
AB-214_I09_Cp_15.9_bact_MDW_3000m_MED_HNA	Bacteria	Proteobacteria	Deltaproteobacteria	Desulfurellales	Desulfurellaceae
AAA288_A21_Cp_6.0_bact_AAIW_770m_HOT_LNA	Bacteria	Proteobacteria	Deltaproteobacteria	SAR324 clade(Marine group B)
AAA288_C06_Cp_6.3_bact_AAIW_770m_HOT_LNA	Bacteria	Proteobacteria	Deltaproteobacteria	SAR324 clade(Marine group B)
AAA290_M23_Cp_14.0_bact_OMZ_200m_HOT_HNA	Bacteria	Proteobacteria	Deltaproteobacteria	SAR324 clade(Marine group B)
AAA290_O09_Cp_6.6_bact_OMZ_200m_HOT_HNA	Bacteria	Proteobacteria	Deltaproteobacteria	SAR324 clade(Marine group B)
AAA290_O19_Cp_12.7_bact_OMZ_200m_HOT_HNA	Bacteria	Proteobacteria	Deltaproteobacteria	SAR324 clade(Marine group B)
AAA292_D08_Cp_6.3_bact_OMZ_200m_HOT_LNA	Bacteria	Proteobacteria	Deltaproteobacteria	SAR324 clade(Marine group B)
AAA292_G11_Cp_8.5_bact_OMZ_200m_HOT_LNA	Bacteria	Proteobacteria	Deltaproteobacteria	SAR324 clade(Marine group B)
AAA292_G13_Cp_11.2_bact_OMZ_200m_HOT_LNA	Bacteria	Proteobacteria	Deltaproteobacteria	SAR324 clade(Marine group B)
AAA292_J20_Cp_8.1_bact_OMZ_200m_HOT_LNA	Bacteria	Proteobacteria	Deltaproteobacteria	SAR324 clade(Marine group B)
AB-606_E10_Cp_5.3_bact_NADW_3200m_SA_all	Bacteria	Proteobacteria	Deltaproteobacteria	SAR324 clade(Marine group B)
AB-606_G07_Cp_5.2_bact_NADW_3200m_SA_all	Bacteria	Proteobacteria	Deltaproteobacteria	SAR324 clade(Marine group B)
AB-606_O22_Cp_7.3_bact_NADW_3200m_SA_all	Bacteria	Proteobacteria	Deltaproteobacteria	SAR324 clade(Marine group B)
AB-629_E11_Cp_6.5_bact_OMZ_511m_NA_all	Bacteria	Proteobacteria	Deltaproteobacteria	SAR324 clade(Marine group B)
AB-629_E17_Cp_9.0_bact_OMZ_511m_NA_all	Bacteria	Proteobacteria	Deltaproteobacteria	SAR324 clade(Marine group B)
AB-629_F03_Cp_8.1_bact_OMZ_511m_NA_all	Bacteria	Proteobacteria	Deltaproteobacteria	SAR324 clade(Marine group B)
AB-629_F05_Cp_6.1_bact_OMZ_511m_NA_all	Bacteria	Proteobacteria	Deltaproteobacteria	SAR324 clade(Marine group B)
AB-629_F20_Cp_9.4_bact_OMZ_511m_NA_all	Bacteria	Proteobacteria	Deltaproteobacteria	SAR324 clade(Marine group B)
AB-629_G03_Cp_5.4_bact_OMZ_511m_NA_all	Bacteria	Proteobacteria	Deltaproteobacteria	SAR324 clade(Marine group B)
AB-629_I18_Cp_7.7_bact_OMZ_511m_NA_all	Bacteria	Proteobacteria	Deltaproteobacteria	SAR324 clade(Marine group B)
AB-629_I22_Cp_5.7_bact_OMZ_511m_NA_all	Bacteria	Proteobacteria	Deltaproteobacteria	SAR324 clade(Marine group B)
AB-629_J17_Cp_5.1_bact_OMZ_511m_NA_all_seq	Bacteria	Proteobacteria	Deltaproteobacteria	SAR324 clade(Marine group B)
AB-629_K06_Cp_9.2_bact_OMZ_511m_NA_all	Bacteria	Proteobacteria	Deltaproteobacteria	SAR324 clade(Marine group B)
AB-629_K13_Cp_6.5_bact_OMZ_511m_NA_all	Bacteria	Proteobacteria	Deltaproteobacteria	SAR324 clade(Marine group B)
AB-629_L14_Cp_8.3_bact_OMZ_511m_NA_all	Bacteria	Proteobacteria	Deltaproteobacteria	SAR324 clade(Marine group B)
AB-629_L22_Cp_5.8_bact_OMZ_511m_NA_all	Bacteria	Proteobacteria	Deltaproteobacteria	SAR324 clade(Marine group B)
AB-629_M11_Cp_6.8_bact_OMZ_511m_NA_all	Bacteria	Proteobacteria	Deltaproteobacteria	SAR324 clade(Marine group B)
AB-629_M21_Cp_7.5_bact_OMZ_511m_NA_all	Bacteria	Proteobacteria	Deltaproteobacteria	SAR324 clade(Marine group B)
AB-629_N04_Cp_6.0_bact_OMZ_511m_NA_all	Bacteria	Proteobacteria	Deltaproteobacteria	SAR324 clade(Marine group B)
AB-629_N07_Cp_8.3_bact_OMZ_511m_NA_all	Bacteria	Proteobacteria	Deltaproteobacteria	SAR324 clade(Marine group B)
AB-629_O04_Cp_6.4_bact_OMZ_511m_NA_all	Bacteria	Proteobacteria	Deltaproteobacteria	SAR324 clade(Marine group B)
AB-629_O05_Cp_5.3_bact_OMZ_511m_NA_all_seq	Bacteria	Proteobacteria	Deltaproteobacteria	SAR324 clade(Marine group B)
AB-629_O13_Cp_9.6_bact_OMZ_511m_NA_all	Bacteria	Proteobacteria	Deltaproteobacteria	SAR324 clade(Marine group B)
AB-629_P02_Cp_5.6_bact_OMZ_511m_NA_all	Bacteria	Proteobacteria	Deltaproteobacteria	SAR324 clade(Marine group B)
AB-629_P07_Cp_7.3_bact_OMZ_511m_NA_all	Bacteria	Proteobacteria	Deltaproteobacteria	SAR324 clade(Marine group B)
AB-629_P09_Cp_6.1_bact_OMZ_511m_NA_all	Bacteria	Proteobacteria	Deltaproteobacteria	SAR324 clade(Marine group B)
AB-629_P21_Cp_5.3_bact_OMZ_511m_NA_all	Bacteria	Proteobacteria	Deltaproteobacteria	SAR324 clade(Marine group B)
AB-606_B02_Cp_15.3_bact_NADW_3200m_SA_all	Bacteria	Proteobacteria	Alphaproteobacteria	Sphingomonadales	Erythrobacteraceae	Erythrobacter
AAA292_M05_Cp_7.8_bact_OMZ_200m_HOT_LNA	Bacteria	Proteobacteria	Alphaproteobacteria	Rickettsiales	S25-593
AB-219_I20_Cp_8.2_bact_MDW_3000m_MED_LNA	Bacteria	Proteobacteria	Alphaproteobacteria	Rickettsiales	S25-593
AB-220_E09_Cp_9.8_bact_MDW_3000m_MED_LNA	Bacteria	Proteobacteria	Alphaproteobacteria	Rickettsiales	S25-593
AB-220_J10_Cp_11.4_bact_MDW_3000m_MED_LNA	Bacteria	Proteobacteria	Alphaproteobacteria	Rickettsiales	S25-593
AB-222_E02_Cp_8.6_bact_MDW_3000m_MED_LNAL	Bacteria	Proteobacteria	Alphaproteobacteria	Rickettsiales	S25-593
AB-222_L19_Cp_12.3_bact_MDW_3000m_MED_LNAL	Bacteria	Proteobacteria	Alphaproteobacteria	Rickettsiales	S25-593
AB-606_J10_Cp_14.2_bact_NADW_3200m_SA_all	Bacteria	Proteobacteria	Alphaproteobacteria	Rhodobacterales	Rhodobacteraceae	Sulfitobacter
AB-629_P10_Cp_7.2_bact_OMZ_511m_NA_all	Bacteria	Proteobacteria	Alphaproteobacteria	Rhodospirillales	Rhodospirillaceae
AAA292_B06_Cp_8.5_bact_OMZ_200m_HOT_LNA	Bacteria	Proteobacteria	Alphaproteobacteria	Rhodospirillales	Rhodospirillaceae	AEGEAN-169 marine group
AAA292_P22_Cp_6.4_bact_OMZ_200m_HOT_LNA	Bacteria	Proteobacteria	Alphaproteobacteria	Rhodospirillales	Rhodospirillaceae	AEGEAN-169 marine group
AB-629_L05_Cp_8.2_bact_OMZ_511m_NA_all	Bacteria	Proteobacteria	Alphaproteobacteria	Rhodospirillales	Rhodospirillaceae	AEGEAN-169 marine group
AB-629_M07_Cp_8.1_bact_OMZ_511m_NA_all	Bacteria	Proteobacteria	Alphaproteobacteria	Rhodospirillales	Rhodospirillaceae	AEGEAN-169 marine group
AB-629_N20_Cp_8.0_bact_OMZ_511m_NA_all	Bacteria	Proteobacteria	Alphaproteobacteria	Rhodospirillales	Rhodospirillaceae	AEGEAN-169 marine group
AAA292_J05_Cp_7.1_bact_OMZ_200m_HOT_LNA	Bacteria	Proteobacteria	Alphaproteobacteria	Rhodospirillales	Rhodospirillaceae	Defluviicoccus
AB-629_O02_Cp_12.2_bact_OMZ_511m_NA_all	Bacteria	Proteobacteria	Alphaproteobacteria	Rhodospirillales	Rhodospirillaceae	Defluviicoccus
AAA290_K06_Cp_14.5_bact_OMZ_200m_HOT_HNA	Bacteria	Proteobacteria	Alphaproteobacteria	Rhodospirillales	Rhodospirillaceae	Unknown Rhodospirillaceae genus
AAA290_O03_Cp_8.8_bact_OMZ_200m_HOT_HNA	Bacteria	Proteobacteria	Alphaproteobacteria	Rhodospirillales	Rhodospirillaceae	Unknown Rhodospirillaceae genus
AB-629_F11_Cp_5.6_bact_OMZ_511m_NA_all_seq	Bacteria	Proteobacteria	Alphaproteobacteria	Rhodospirillales	Unknown Rhodospirillales family
AAA288_A23_Cp_5.1_bact_AAIW_770m_HOT_LNA	Bacteria	Proteobacteria	Alphaproteobacteria	SAR11 clade
AAA288_F04_Cp_7.4_bact_AAIW_770m_HOT_LNA	Bacteria	Proteobacteria	Alphaproteobacteria	SAR11 clade
AAA288_F15_Cp_7.9_bact_AAIW_770m_HOT_LNA	Bacteria	Proteobacteria	Alphaproteobacteria	SAR11 clade
AAA288_G10_Cp_8.9_bact_AAIW_770m_HOT_LNA	Bacteria	Proteobacteria	Alphaproteobacteria	SAR11 clade
AAA288_G22_Cp_8.5_bact_AAIW_770m_HOT_LNA	Bacteria	Proteobacteria	Alphaproteobacteria	SAR11 clade
AAA288_I21_Cp_5.9_bact_AAIW_770m_HOT_LNA	Bacteria	Proteobacteria	Alphaproteobacteria	SAR11 clade
AAA288_J03_Cp_8.4_bact_AAIW_770m_HOT_LNA	Bacteria	Proteobacteria	Alphaproteobacteria	SAR11 clade
AAA288_J21_Cp_5.8_bact_AAIW_770m_HOT_LNA	Bacteria	Proteobacteria	Alphaproteobacteria	SAR11 clade
AAA288_K06_Cp_5.8_bact_AAIW_770m_HOT_LNA	Bacteria	Proteobacteria	Alphaproteobacteria	SAR11 clade
AAA288_L17_Cp_5.7_bact_AAIW_770m_HOT_LNA	Bacteria	Proteobacteria	Alphaproteobacteria	SAR11 clade
AAA288_L21_Cp_5.6_bact_AAIW_770m_HOT_LNA	Bacteria	Proteobacteria	Alphaproteobacteria	SAR11 clade
AAA288_M03_Cp_6.9_bact_AAIW_770m_HOT_LNA	Bacteria	Proteobacteria	Alphaproteobacteria	SAR11 clade
AAA288_M18_Cp_7.2_bact_AAIW_770m_HOT_LNA	Bacteria	Proteobacteria	Alphaproteobacteria	SAR11 clade
AAA288_P07_Cp_6.0_bact_AAIW_770m_HOT_LNA	Bacteria	Proteobacteria	Alphaproteobacteria	SAR11 clade
AAA290_A08_Cp_11.5_bact_OMZ_200m_HOT_HNA	Bacteria	Proteobacteria	Alphaproteobacteria	SAR11 clade
AAA290_A19_Cp_8.3_bact_OMZ_200m_HOT_HNA	Bacteria	Proteobacteria	Alphaproteobacteria	SAR11 clade
AAA290_B02_Cp_6.5_bact_OMZ_200m_HOT_HNA	Bacteria	Proteobacteria	Alphaproteobacteria	SAR11 clade
AAA290_C06_Cp_11.7_bact_OMZ_200m_HOT_HNA	Bacteria	Proteobacteria	Alphaproteobacteria	SAR11 clade
AAA290_D11_Cp_7.5_bact_OMZ_200m_HOT_HNA	Bacteria	Proteobacteria	Alphaproteobacteria	SAR11 clade
AAA290_G03_Cp_6.3_bact_OMZ_200m_HOT_HNA	Bacteria	Proteobacteria	Alphaproteobacteria	SAR11 clade
AAA290_I08_Cp_8.8_bact_OMZ_200m_HOT_HNA	Bacteria	Proteobacteria	Alphaproteobacteria	SAR11 clade
AAA292_J11_Cp_9.5_bact_OMZ_200m_HOT_LNA	Bacteria	Proteobacteria	Alphaproteobacteria	SAR11 clade
AB-219_C13_Cp_9.3_bact_MDW_3000m_MED_LNA	Bacteria	Proteobacteria	Alphaproteobacteria	SAR11 clade
AB-219_F11_Cp_11.4_bact_MDW_3000m_MED_LNA	Bacteria	Proteobacteria	Alphaproteobacteria	SAR11 clade
AB-219_I11_Cp_7.2_bact_MDW_3000m_MED_LNA	Bacteria	Proteobacteria	Alphaproteobacteria	SAR11 clade
AB-219_L09_Cp_12.3_bact_MDW_3000m_MED_LNA	Bacteria	Proteobacteria	Alphaproteobacteria	SAR11 clade
AB-220_E03_Cp_9.4_bact_MDW_3000m_MED_LNA	Bacteria	Proteobacteria	Alphaproteobacteria	SAR11 clade
AB-220_F07_Cp_9.4_bact_MDW_3000m_MED_LNA	Bacteria	Proteobacteria	Alphaproteobacteria	SAR11 clade
AB-220_F09_Cp_12.1_bact_MDW_3000m_MED_LNA	Bacteria	Proteobacteria	Alphaproteobacteria	SAR11 clade
AB-220_F14_Cp_11.2_bact_MDW_3000m_MED_LNA	Bacteria	Proteobacteria	Alphaproteobacteria	SAR11 clade
AB-220_K07_Cp_7.3_bact_MDW_3000m_MED_LNA	Bacteria	Proteobacteria	Alphaproteobacteria	SAR11 clade
AB-220_P09_Cp_9.1_bact_MDW_3000m_MED_LNA	Bacteria	Proteobacteria	Alphaproteobacteria	SAR11 clade
AB-554_I05_Cp_8.1_bact_MDW_3000m_MED_all	Bacteria	Proteobacteria	Alphaproteobacteria	SAR11 clade
AB-629_E19_Cp_6.8_bact_OMZ_511m_NA_all	Bacteria	Proteobacteria	Alphaproteobacteria	SAR11 clade
AB-629_G21_Cp_4.8_bact_OMZ_511m_NA_all_seq	Bacteria	Proteobacteria	Alphaproteobacteria	SAR11 clade
AB-629_I02_Cp_4.9_bact_OMZ_511m_NA_all	Bacteria	Proteobacteria	Alphaproteobacteria	SAR11 clade
AAA288_C02_Cp_5.9_bact_AAIW_770m_HOT_LNA	Bacteria	Proteobacteria	Alphaproteobacteria	SAR11 clade	Deep 1
AAA288_C03_Cp_7.5_bact_AAIW_770m_HOT_LNA	Bacteria	Proteobacteria	Alphaproteobacteria	SAR11 clade	Deep 1
AAA288_C23_Cp_4.6_bact_AAIW_770m_HOT_LNA	Bacteria	Proteobacteria	Alphaproteobacteria	SAR11 clade	Deep 1
AAA288_E02_Cp_8.0_bact_AAIW_770m_HOT_LNA	Bacteria	Proteobacteria	Alphaproteobacteria	SAR11 clade	Deep 1
AAA288_E17_Cp_6.4_bact_AAIW_770m_HOT_LNA	Bacteria	Proteobacteria	Alphaproteobacteria	SAR11 clade	Deep 1
AAA288_F19_Cp_5.5_bact_AAIW_770m_HOT_LNA	Bacteria	Proteobacteria	Alphaproteobacteria	SAR11 clade	Deep 1
AAA288_I19_Cp_7.8_bact_AAIW_770m_HOT_LNA	Bacteria	Proteobacteria	Alphaproteobacteria	SAR11 clade	Deep 1
AAA288_K11_Cp_8.6_bact_AAIW_770m_HOT_LNA	Bacteria	Proteobacteria	Alphaproteobacteria	SAR11 clade	Deep 1
AAA288_L07_Cp_6.8_bact_AAIW_770m_HOT_LNA	Bacteria	Proteobacteria	Alphaproteobacteria	SAR11 clade	Deep 1
AAA288_M10_Cp_5.2_bact_AAIW_770m_HOT_LNA	Bacteria	Proteobacteria	Alphaproteobacteria	SAR11 clade	Deep 1
AAA288_O14_Cp_6.1_bact_AAIW_770m_HOT_LNA	Bacteria	Proteobacteria	Alphaproteobacteria	SAR11 clade	Deep 1
AAA288_P11_Cp_6.0_bact_AAIW_770m_HOT_LNA	Bacteria	Proteobacteria	Alphaproteobacteria	SAR11 clade	Deep 1
AAA288_P21_Cp_5.8_bact_AAIW_770m_HOT_LNA	Bacteria	Proteobacteria	Alphaproteobacteria	SAR11 clade	Deep 1
AAA290_C11_Cp_9.4_bact_OMZ_200m_HOT_HNA	Bacteria	Proteobacteria	Alphaproteobacteria	SAR11 clade	Deep 1
AAA290_C20_Cp_9.0_bact_OMZ_200m_HOT_HNA	Bacteria	Proteobacteria	Alphaproteobacteria	SAR11 clade	Deep 1
AAA292_L06_Cp_10.8_bact_OMZ_200m_HOT_LNA	Bacteria	Proteobacteria	Alphaproteobacteria	SAR11 clade	Deep 1
AAA292_L15_Cp_6.5_bact_OMZ_200m_HOT_LNA	Bacteria	Proteobacteria	Alphaproteobacteria	SAR11 clade	Deep 1
AAA292_O20_Cp_13.8_bact_OMZ_200m_HOT_LNA	Bacteria	Proteobacteria	Alphaproteobacteria	SAR11 clade	Deep 1
AAA292_O22_Cp_7.0_bact_OMZ_200m_HOT_LNA	Bacteria	Proteobacteria	Alphaproteobacteria	SAR11 clade	Deep 1
AAA292_P10_Cp_7.9_bact_OMZ_200m_HOT_LNA	Bacteria	Proteobacteria	Alphaproteobacteria	SAR11 clade	Deep 1
AB-214_M07_Cp_14.6_bact_MDW_3000m_MED_HNA	Bacteria	Proteobacteria	Alphaproteobacteria	SAR11 clade	Deep 1
AB-219_B19_Cp_11.8_bact_MDW_3000m_MED_LNA	Bacteria	Proteobacteria	Alphaproteobacteria	SAR11 clade	Deep 1
AB-219_B21_Cp_12.2_bact_MDW_3000m_MED_LNA	Bacteria	Proteobacteria	Alphaproteobacteria	SAR11 clade	Deep 1
AB-219_E07_Cp_10.1_bact_MDW_3000m_MED_LNA	Bacteria	Proteobacteria	Alphaproteobacteria	SAR11 clade	Deep 1
AB-219_E16_Cp_10.8_bact_MDW_3000m_MED_LNA	Bacteria	Proteobacteria	Alphaproteobacteria	SAR11 clade	Deep 1
AB-219_F05_Cp_7.8_bact_MDW_3000m_MED_LNA	Bacteria	Proteobacteria	Alphaproteobacteria	SAR11 clade	Deep 1
AB-219_F06_Cp_9.7_bact_MDW_3000m_MED_LNA	Bacteria	Proteobacteria	Alphaproteobacteria	SAR11 clade	Deep 1
AB-219_F19_Cp_11.4_bact_MDW_3000m_MED_LNA	Bacteria	Proteobacteria	Alphaproteobacteria	SAR11 clade	Deep 1
AB-219_G05_Cp_8.9_bact_MDW_3000m_MED_LNA	Bacteria	Proteobacteria	Alphaproteobacteria	SAR11 clade	Deep 1
AB-219_I10_Cp_12.0_bact_MDW_3000m_MED_LNA	Bacteria	Proteobacteria	Alphaproteobacteria	SAR11 clade	Deep 1
AB-219_I16_Cp_10.7_bact_MDW_3000m_MED_LNA	Bacteria	Proteobacteria	Alphaproteobacteria	SAR11 clade	Deep 1
AB-219_J05_Cp_8.7_bact_MDW_3000m_MED_LNA	Bacteria	Proteobacteria	Alphaproteobacteria	SAR11 clade	Deep 1
AB-219_J06_Cp_8.3_bact_MDW_3000m_MED_LNA	Bacteria	Proteobacteria	Alphaproteobacteria	SAR11 clade	Deep 1
AB-219_J16_Cp_12.3_bact_MDW_3000m_MED_LNA	Bacteria	Proteobacteria	Alphaproteobacteria	SAR11 clade	Deep 1
AB-219_K09_Cp_10.4_bact_MDW_3000m_MED_LNA	Bacteria	Proteobacteria	Alphaproteobacteria	SAR11 clade	Deep 1
AB-219_L18_Cp_9.7_bact_MDW_3000m_MED_LNA	Bacteria	Proteobacteria	Alphaproteobacteria	SAR11 clade	Deep 1
AB-219_M20_Cp_8.2_bact_MDW_3000m_MED_LNA	Bacteria	Proteobacteria	Alphaproteobacteria	SAR11 clade	Deep 1
AB-219_M23_Cp_7.7_bact_MDW_3000m_MED_LNA	Bacteria	Proteobacteria	Alphaproteobacteria	SAR11 clade	Deep 1
AB-219_N14_Cp_8.2_bact_MDW_3000m_MED_LNA	Bacteria	Proteobacteria	Alphaproteobacteria	SAR11 clade	Deep 1
AB-219_O23_Cp_9.4_bact_MDW_3000m_MED_LNA	Bacteria	Proteobacteria	Alphaproteobacteria	SAR11 clade	Deep 1
AB-219_P21_Cp_8.6_bact_MDW_3000m_MED_LNA	Bacteria	Proteobacteria	Alphaproteobacteria	SAR11 clade	Deep 1
AB-220_A03_Cp_12.6_bact_MDW_3000m_MED_LNA	Bacteria	Proteobacteria	Alphaproteobacteria	SAR11 clade	Deep 1
AB-220_A15_Cp_12.0_bact_MDW_3000m_MED_LNA	Bacteria	Proteobacteria	Alphaproteobacteria	SAR11 clade	Deep 1
AB-220_G19_Cp_10.4_bact_MDW_3000m_MED_LNA	Bacteria	Proteobacteria	Alphaproteobacteria	SAR11 clade	Deep 1
AB-220_G23_Cp_9.6_bact_MDW_3000m_MED_LNA	Bacteria	Proteobacteria	Alphaproteobacteria	SAR11 clade	Deep 1
AB-220_K19_Cp_11.3_bact_MDW_3000m_MED_LNA	Bacteria	Proteobacteria	Alphaproteobacteria	SAR11 clade	Deep 1
AB-220_M16_Cp_11.9_bact_MDW_3000m_MED_LNA	Bacteria	Proteobacteria	Alphaproteobacteria	SAR11 clade	Deep 1
AB-220_M18_Cp_11.6_bact_MDW_3000m_MED_LNA	Bacteria	Proteobacteria	Alphaproteobacteria	SAR11 clade	Deep 1
AB-554_A02_Cp_12.4_bact_MDW_3000m_MED_all	Bacteria	Proteobacteria	Alphaproteobacteria	SAR11 clade	Deep 1
AB-554_L23_Cp_8.2_bact_MDW_3000m_MED_all	Bacteria	Proteobacteria	Alphaproteobacteria	SAR11 clade	Deep 1
AB-606_K03_Cp_6.0_bact_NADW_3200m_SA_all	Bacteria	Proteobacteria	Alphaproteobacteria	SAR11 clade	Deep 1
AB-629_G14_Cp_5.4_bact_OMZ_511m_NA_all	Bacteria	Proteobacteria	Alphaproteobacteria	SAR11 clade	Deep 1
AB-629_K14_Cp_7.7_bact_OMZ_511m_NA_all	Bacteria	Proteobacteria	Alphaproteobacteria	SAR11 clade	Deep 1
AAA288_B13_Cp_6.5_bact_AAIW_770m_HOT_LNA	Bacteria	Proteobacteria	Alphaproteobacteria	SAR11 clade	Surface 1
AAA288_E13_Cp_7.7_bact_AAIW_770m_HOT_LNA_seq	Bacteria	Proteobacteria	Alphaproteobacteria	SAR11 clade	Surface 1
AAA288_E20_Cp_5.8_bact_AAIW_770m_HOT_LNA	Bacteria	Proteobacteria	Alphaproteobacteria	SAR11 clade	Surface 1
AAA288_G21_Cp_5.5_bact_AAIW_770m_HOT_LNA_seq	Bacteria	Proteobacteria	Alphaproteobacteria	SAR11 clade	Surface 1
AAA288_I11_Cp_6.2_bact_AAIW_770m_HOT_LNA	Bacteria	Proteobacteria	Alphaproteobacteria	SAR11 clade	Surface 1
AAA288_J08_Cp_6.4_bact_AAIW_770m_HOT_LNA	Bacteria	Proteobacteria	Alphaproteobacteria	SAR11 clade	Surface 1
AAA288_J15_Cp_7.8_bact_AAIW_770m_HOT_LNA	Bacteria	Proteobacteria	Alphaproteobacteria	SAR11 clade	Surface 1
AAA288_K08_Cp_5.8_bact_AAIW_770m_HOT_LNA	Bacteria	Proteobacteria	Alphaproteobacteria	SAR11 clade	Surface 1
AAA288_K14_Cp_6.2_bact_AAIW_770m_HOT_LNA	Bacteria	Proteobacteria	Alphaproteobacteria	SAR11 clade	Surface 1
AAA288_K21_Cp_5.8_bact_AAIW_770m_HOT_LNA	Bacteria	Proteobacteria	Alphaproteobacteria	SAR11 clade	Surface 1
AAA288_L13_Cp_6.9_bact_AAIW_770m_HOT_LNA	Bacteria	Proteobacteria	Alphaproteobacteria	SAR11 clade	Surface 1
AAA288_L19_Cp_5.8_bact_AAIW_770m_HOT_LNA	Bacteria	Proteobacteria	Alphaproteobacteria	SAR11 clade	Surface 1
AAA288_N07_Cp_6.1_bact_AAIW_770m_HOT_LNA_seq	Bacteria	Proteobacteria	Alphaproteobacteria	SAR11 clade	Surface 1
AAA288_N16_Cp_6.4_bact_AAIW_770m_HOT_LNA	Bacteria	Proteobacteria	Alphaproteobacteria	SAR11 clade	Surface 1
AAA288_N17_Cp_5.7_bact_AAIW_770m_HOT_LNA	Bacteria	Proteobacteria	Alphaproteobacteria	SAR11 clade	Surface 1
AAA288_N22_Cp_7.2_bact_AAIW_770m_HOT_LNA	Bacteria	Proteobacteria	Alphaproteobacteria	SAR11 clade	Surface 1
AAA288_O03_Cp_7.0_bact_AAIW_770m_HOT_LNA	Bacteria	Proteobacteria	Alphaproteobacteria	SAR11 clade	Surface 1
AAA290_E05_Cp_7.8_bact_OMZ_200m_HOT_HNA	Bacteria	Proteobacteria	Alphaproteobacteria	SAR11 clade	Surface 1
AAA290_E20_Cp_7.7_bact_OMZ_200m_HOT_HNA	Bacteria	Proteobacteria	Alphaproteobacteria	SAR11 clade	Surface 1
AAA290_J17_Cp_12.6_bact_OMZ_200m_HOT_HNA	Bacteria	Proteobacteria	Alphaproteobacteria	SAR11 clade	Surface 1
AAA290_J20_Cp_7.6_bact_OMZ_200m_HOT_HNA	Bacteria	Proteobacteria	Alphaproteobacteria	SAR11 clade	Surface 1
AAA290_M13_Cp_8.8_bact_OMZ_200m_HOT_HNA	Bacteria	Proteobacteria	Alphaproteobacteria	SAR11 clade	Surface 1
AAA292_B05_Cp_8.4_bact_OMZ_200m_HOT_LNA	Bacteria	Proteobacteria	Alphaproteobacteria	SAR11 clade	Surface 1
AAA292_J02_Cp_8.5_bact_OMZ_200m_HOT_LNA	Bacteria	Proteobacteria	Alphaproteobacteria	SAR11 clade	Surface 1
AAA292_N13_Cp_8.1_bact_OMZ_200m_HOT_LNA	Bacteria	Proteobacteria	Alphaproteobacteria	SAR11 clade	Surface 1
AAA292_N19_Cp_6.6_bact_OMZ_200m_HOT_LNA	Bacteria	Proteobacteria	Alphaproteobacteria	SAR11 clade	Surface 1
AB-219_D10_Cp_8.3_bact_MDW_3000m_MED_LNA	Bacteria	Proteobacteria	Alphaproteobacteria	SAR11 clade	Surface 1
AB-219_F21_Cp_11.4_bact_MDW_3000m_MED_LNA	Bacteria	Proteobacteria	Alphaproteobacteria	SAR11 clade	Surface 1
AB-219_K15_Cp_9.4_bact_MDW_3000m_MED_LNA	Bacteria	Proteobacteria	Alphaproteobacteria	SAR11 clade	Surface 1
AB-220_E14_Cp_13.6_bact_MDW_3000m_MED_LNA	Bacteria	Proteobacteria	Alphaproteobacteria	SAR11 clade	Surface 1
AB-629_E14_Cp_5.3_bact_OMZ_511m_NA_all	Bacteria	Proteobacteria	Alphaproteobacteria	SAR11 clade	Surface 1
AB-629_J18_Cp_8.4_bact_OMZ_511m_NA_all	Bacteria	Proteobacteria	Alphaproteobacteria	SAR11 clade	Surface 1
AB-629_K05_Cp_7.8_bact_OMZ_511m_NA_all	Bacteria	Proteobacteria	Alphaproteobacteria	SAR11 clade	Surface 1
AB-629_L03_Cp_5.2_bact_OMZ_511m_NA_all	Bacteria	Proteobacteria	Alphaproteobacteria	SAR11 clade	Surface 1
AAA288_E22_Cp_7.6_bact_AAIW_770m_HOT_LNA	Bacteria	Proteobacteria	Alphaproteobacteria	SAR11 clade	Deep 2
AAA288_P05_Cp_6.1_bact_AAIW_770m_HOT_LNA	Bacteria	Proteobacteria	Alphaproteobacteria	SAR11 clade	Deep 2
AB-215_E21_Cp_11.3_bact_MDW_3000m_MED_HNA	Bacteria	Proteobacteria	Gammaproteobacteria
AB-606_M07_Cp_15.1_bact_NADW_3200m_SA_all	Bacteria	Proteobacteria	Gammaproteobacteria
AAA290_O07_Cp_12.8_bact_OMZ_200m_HOT_HNA	Bacteria	Proteobacteria	Gammaproteobacteria	E01-9C-26 marine group
AAA292_K22_Cp_7.9_bact_OMZ_200m_HOT_LNA	Bacteria	Proteobacteria	Gammaproteobacteria	E01-9C-26 marine group
AB-214_K21_Cp_15.5_bact_MDW_3000m_MED_HNA	Bacteria	Proteobacteria	Gammaproteobacteria	E01-9C-26 marine group
AB-554_E23_Cp_13.7_bact_MDW_3000m_MED_all	Bacteria	Proteobacteria	Gammaproteobacteria	E01-9C-26 marine group
AB-554_G09_Cp_13.7_bact_MDW_3000m_MED_all	Bacteria	Proteobacteria	Gammaproteobacteria	E01-9C-26 marine group
AB-554_G19_Cp_13.7_bact_MDW_3000m_MED_all	Bacteria	Proteobacteria	Gammaproteobacteria	E01-9C-26 marine group
AB-554_K14_Cp_13.5_bact_MDW_3000m_MED_all	Bacteria	Proteobacteria	Gammaproteobacteria	E01-9C-26 marine group
AB-554_N08_Cp_13.7_bact_MDW_3000m_MED_all	Bacteria	Proteobacteria	Gammaproteobacteria	E01-9C-26 marine group
AB-606_K17_Cp_9.8_bact_NADW_3200m_SA_all	Bacteria	Proteobacteria	Gammaproteobacteria	E01-9C-26 marine group
AB-629_G18_Cp_7.2_bact_OMZ_511m_NA_all	Bacteria	Proteobacteria	Gammaproteobacteria	E01-9C-26 marine group
AB-629_K02_Cp_7.2_bact_OMZ_511m_NA_all_seq	Bacteria	Proteobacteria	Gammaproteobacteria	E01-9C-26 marine group
AB-629_K09_Cp_7.5_bact_OMZ_511m_NA_all	Bacteria	Proteobacteria	Gammaproteobacteria	E01-9C-26 marine group
AB-629_P05_Cp_7.7_bact_OMZ_511m_NA_all	Bacteria	Proteobacteria	Gammaproteobacteria	E01-9C-26 marine group
AB-629_G22_Cp_9.2_bact_OMZ_511m_NA_all	Bacteria	Proteobacteria	Gammaproteobacteria	KI89A clade
AAA288_A18_Cp_6.3_bact_AAIW_770m_HOT_LNA	Bacteria	Proteobacteria	Gammaproteobacteria	Salinisphaerales	Salinisphaeraceae	ZD0417 marine group
AAA288_I04_Cp_6.8_bact_AAIW_770m_HOT_LNA	Bacteria	Proteobacteria	Gammaproteobacteria	Salinisphaerales	Salinisphaeraceae	ZD0417 marine group
AAA288_N10_Cp_7.5_bact_AAIW_770m_HOT_LNA	Bacteria	Proteobacteria	Gammaproteobacteria	Salinisphaerales	Salinisphaeraceae	ZD0417 marine group
AB-219_A07_Cp_11.9_bact_MDW_3000m_MED_LNA	Bacteria	Proteobacteria	Gammaproteobacteria	Salinisphaerales	Salinisphaeraceae	ZD0417 marine group
AB-606_I07_Cp_13.7_bact_NADW_3200m_SA_all	Bacteria	Proteobacteria	Gammaproteobacteria	Pseudomonadales	Pseudomonadaceae	Pseudomonas
AB-214_P03_Cp_15.9_bact_MDW_3000m_MED_HNA	Bacteria	Proteobacteria	Gammaproteobacteria	Pseudomonadales	Moraxellaceae	Psychrobacter
AB-606_F13_Cp_9.1_bact_NADW_3200m_SA_all	Bacteria	Proteobacteria	Gammaproteobacteria	Pseudomonadales	Moraxellaceae	Psychrobacter
AB-606_F20_Cp_7.8_bact_NADW_3200m_SA_all	Bacteria	Proteobacteria	Gammaproteobacteria	Pseudomonadales	Moraxellaceae	Psychrobacter
AB-606_G17_Cp_7.6_bact_NADW_3200m_SA_all	Bacteria	Proteobacteria	Gammaproteobacteria	Pseudomonadales	Moraxellaceae	Psychrobacter
AB-606_K23_Cp_6.8_bact_NADW_3200m_SA_all	Bacteria	Proteobacteria	Gammaproteobacteria	Pseudomonadales	Moraxellaceae	Psychrobacter
AB-606_L11_Cp_9.1_bact_NADW_3200m_SA_all	Bacteria	Proteobacteria	Gammaproteobacteria	Pseudomonadales	Moraxellaceae	Psychrobacter
AB-606_N10_Cp_6.8_bact_NADW_3200m_SA_all	Bacteria	Proteobacteria	Gammaproteobacteria	Pseudomonadales	Moraxellaceae	Psychrobacter
AB-606_N23_Cp_5.9_bact_NADW_3200m_SA_all	Bacteria	Proteobacteria	Gammaproteobacteria	Pseudomonadales	Moraxellaceae	Psychrobacter
AB-606_O21_Cp_6.9_bact_NADW_3200m_SA_all	Bacteria	Proteobacteria	Gammaproteobacteria	Pseudomonadales	Moraxellaceae	Psychrobacter
AB-606_P13_Cp_6.7_bact_NADW_3200m_SA_all	Bacteria	Proteobacteria	Gammaproteobacteria	Pseudomonadales	Moraxellaceae	Psychrobacter
AB-606_P21_Cp_7.5_bact_NADW_3200m_SA_all	Bacteria	Proteobacteria	Gammaproteobacteria	Pseudomonadales	Moraxellaceae	Psychrobacter
AB-606_A05_Cp_15.3_bact_NADW_3200m_SA_all	Bacteria	Proteobacteria	Gammaproteobacteria	Pseudomonadales	Moraxellaceae	Psychrobacter	Psychrobacter marincola
AB-214_E09_Cp_15.9_bact_MDW_3000m_MED_HNA	Bacteria	Proteobacteria	Gammaproteobacteria	Alteromonadales	Idiomarinaceae	Idiomarina
AB-214_G18_Cp_12.6_bact_MDW_3000m_MED_HNA	Bacteria	Proteobacteria	Gammaproteobacteria	Alteromonadales	Idiomarinaceae	Idiomarina
AB-606_F09_Cp_15.1_bact_NADW_3200m_SA_all	Bacteria	Proteobacteria	Gammaproteobacteria	Alteromonadales	Pseudoalteromonadaceae	Pseudoalteromonas
AB-606_J16_Cp_8.1_bact_NADW_3200m_SA_all	Bacteria	Proteobacteria	Gammaproteobacteria	Alteromonadales	Pseudoalteromonadaceae	Pseudoalteromonas
AB-606_M19_Cp_8.4_bact_NADW_3200m_SA_all	Bacteria	Proteobacteria	Gammaproteobacteria	Alteromonadales	Pseudoalteromonadaceae	Pseudoalteromonas
AB-606_N04_Cp_8.0_bact_NADW_3200m_SA_all	Bacteria	Proteobacteria	Gammaproteobacteria	Alteromonadales	Pseudoalteromonadaceae	Pseudoalteromonas
AB-606_N20_Cp_8.1_bact_NADW_3200m_SA_all	Bacteria	Proteobacteria	Gammaproteobacteria	Alteromonadales	Pseudoalteromonadaceae	Pseudoalteromonas
AB-606_K21_Cp_7.9_bact_NADW_3200m_SA_all	Bacteria	Proteobacteria	Gammaproteobacteria	Alteromonadales	Pseudoalteromonadaceae	Pseudoalteromonas	Pseudoalteromonas ruthenica
AB-214_A03_Cp_15.9_bact_MDW_3000m_MED_HNA	Bacteria	Proteobacteria	Gammaproteobacteria	Alteromonadales	Alteromonadaceae	Alteromonas
AB-215_F22_Cp_14.7_bact_MDW_3000m_MED_HNA	Bacteria	Proteobacteria	Gammaproteobacteria	Alteromonadales	Alteromonadaceae	Alteromonas
AB-554_P19_Cp_13.7_bact_MDW_3000m_MED_all	Bacteria	Proteobacteria	Gammaproteobacteria	Alteromonadales	Alteromonadaceae	Alteromonas
AB-606_A21_Cp_11.2_bact_NADW_3200m_SA_all	Bacteria	Proteobacteria	Gammaproteobacteria	Alteromonadales	Alteromonadaceae	Alteromonas
AB-606_B03_Cp_8.5_bact_NADW_3200m_SA_all	Bacteria	Proteobacteria	Gammaproteobacteria	Alteromonadales	Alteromonadaceae	Alteromonas
AB-606_C07_Cp_13.9_bact_NADW_3200m_SA_all	Bacteria	Proteobacteria	Gammaproteobacteria	Alteromonadales	Alteromonadaceae	Alteromonas
AB-606_D07_Cp_14.2_bact_NADW_3200m_SA_all	Bacteria	Proteobacteria	Gammaproteobacteria	Alteromonadales	Alteromonadaceae	Alteromonas
AB-606_D13_Cp_13.0_bact_NADW_3200m_SA_all	Bacteria	Proteobacteria	Gammaproteobacteria	Alteromonadales	Alteromonadaceae	Alteromonas
AB-606_J23_Cp_7.6_bact_NADW_3200m_SA_all	Bacteria	Proteobacteria	Gammaproteobacteria	Alteromonadales	Alteromonadaceae	Alteromonas
AB-606_M10_Cp_8.4_bact_NADW_3200m_SA_all	Bacteria	Proteobacteria	Gammaproteobacteria	Alteromonadales	Alteromonadaceae	Alteromonas
AB-606_M15_Cp_12.3_bact_NADW_3200m_SA_all	Bacteria	Proteobacteria	Gammaproteobacteria	Alteromonadales	Alteromonadaceae	Alteromonas
AB-606_M16_Cp_10.7_bact_NADW_3200m_SA_all	Bacteria	Proteobacteria	Gammaproteobacteria	Alteromonadales	Alteromonadaceae	Alteromonas
AB-606_N06_Cp_11.0_bact_NADW_3200m_SA_all	Bacteria	Proteobacteria	Gammaproteobacteria	Alteromonadales	Alteromonadaceae	Alteromonas
AB-606_O18_Cp_10.2_bact_NADW_3200m_SA_all	Bacteria	Proteobacteria	Gammaproteobacteria	Alteromonadales	Alteromonadaceae	Alteromonas
AB-606_O20_Cp_12.7_bact_NADW_3200m_SA_all	Bacteria	Proteobacteria	Gammaproteobacteria	Alteromonadales	Alteromonadaceae	Alteromonas
AB-554_M14_Cp_13.7_bact_MDW_3000m_MED_all	Bacteria	Proteobacteria	Gammaproteobacteria	Alteromonadales	Alteromonadaceae	Unknown Alteromonadaceae genus
AAA288_M11_Cp_6.9_bact_AAIW_770m_HOT_LNA	Bacteria	Proteobacteria	Gammaproteobacteria	Oceanospirillales
AB-629_E15_Cp_8.7_bact_OMZ_511m_NA_all	Bacteria	Proteobacteria	Gammaproteobacteria	Oceanospirillales
AB-629_K18_Cp_6.7_bact_OMZ_511m_NA_all	Bacteria	Proteobacteria	Gammaproteobacteria	Oceanospirillales
AB-629_N02_Cp_9.7_bact_OMZ_511m_NA_all	Bacteria	Proteobacteria	Gammaproteobacteria	Oceanospirillales
AAA288_F13_Cp_7.5_bact_AAIW_770m_HOT_LNA	Bacteria	Proteobacteria	Gammaproteobacteria	Oceanospirillales	ZD0405
AAA288_G15_Cp_6.8_bact_AAIW_770m_HOT_LNA	Bacteria	Proteobacteria	Gammaproteobacteria	Oceanospirillales	ZD0405
AAA288_G16_Cp_9.3_bact_AAIW_770m_HOT_LNA	Bacteria	Proteobacteria	Gammaproteobacteria	Oceanospirillales	ZD0405
AAA288_G17_Cp_7.2_bact_AAIW_770m_HOT_LNA	Bacteria	Proteobacteria	Gammaproteobacteria	Oceanospirillales	ZD0405
AAA288_M14_Cp_9.4_bact_AAIW_770m_HOT_LNA	Bacteria	Proteobacteria	Gammaproteobacteria	Oceanospirillales	ZD0405
AAA288_N05_Cp_6.9_bact_AAIW_770m_HOT_LNA	Bacteria	Proteobacteria	Gammaproteobacteria	Oceanospirillales	ZD0405
AAA288_N11_Cp_7.1_bact_AAIW_770m_HOT_LNA	Bacteria	Proteobacteria	Gammaproteobacteria	Oceanospirillales	ZD0405
AB-629_L11_Cp_6.2_bact_OMZ_511m_NA_all	Bacteria	Proteobacteria	Gammaproteobacteria	Oceanospirillales	ZD0405
AB-629_P17_Cp_5.7_bact_OMZ_511m_NA_all_seq	Bacteria	Proteobacteria	Gammaproteobacteria	Oceanospirillales	ZD0405
AB-606_F05_Cp_15.3_bact_NADW_3200m_SA_all	Bacteria	Proteobacteria	Gammaproteobacteria	Oceanospirillales	Halomonadaceae	Salinicola
AB-214_G08_Cp_15.9_bact_MDW_3000m_MED_HNA	Bacteria	Proteobacteria	Gammaproteobacteria	Oceanospirillales	Halomonadaceae	Halomonas
AB-554_F19_Cp_13.7_bact_MDW_3000m_MED_all	Bacteria	Proteobacteria	Gammaproteobacteria	Oceanospirillales	Halomonadaceae	Halomonas
AB-554_G22_Cp_13.7_bact_MDW_3000m_MED_all	Bacteria	Proteobacteria	Gammaproteobacteria	Oceanospirillales	Halomonadaceae	Halomonas
AB-554_J09_Cp_13.7_bact_MDW_3000m_MED_all	Bacteria	Proteobacteria	Gammaproteobacteria	Oceanospirillales	Halomonadaceae	Halomonas
AB-606_A10_Cp_12.7_bact_NADW_3200m_SA_all	Bacteria	Proteobacteria	Gammaproteobacteria	Oceanospirillales	Halomonadaceae	Halomonas
AB-606_B14_Cp_12.4_bact_NADW_3200m_SA_all	Bacteria	Proteobacteria	Gammaproteobacteria	Oceanospirillales	Halomonadaceae	Halomonas
AB-606_B16_Cp_12.4_bact_NADW_3200m_SA_all	Bacteria	Proteobacteria	Gammaproteobacteria	Oceanospirillales	Halomonadaceae	Halomonas
AB-606_C16_Cp_15.3_bact_NADW_3200m_SA_all	Bacteria	Proteobacteria	Gammaproteobacteria	Oceanospirillales	Halomonadaceae	Halomonas
AB-606_C20_Cp_12.7_bact_NADW_3200m_SA_all	Bacteria	Proteobacteria	Gammaproteobacteria	Oceanospirillales	Halomonadaceae	Halomonas
AB-606_F06_Cp_13.6_bact_NADW_3200m_SA_all	Bacteria	Proteobacteria	Gammaproteobacteria	Oceanospirillales	Halomonadaceae	Halomonas
AB-606_F11_Cp_11.2_bact_NADW_3200m_SA_all	Bacteria	Proteobacteria	Gammaproteobacteria	Oceanospirillales	Halomonadaceae	Halomonas
AB-606_G23_Cp_12.9_bact_NADW_3200m_SA_all	Bacteria	Proteobacteria	Gammaproteobacteria	Oceanospirillales	Halomonadaceae	Halomonas
AB-606_I11_Cp_11.7_bact_NADW_3200m_SA_all	Bacteria	Proteobacteria	Gammaproteobacteria	Oceanospirillales	Halomonadaceae	Halomonas
AB-606_J15_Cp_12.8_bact_NADW_3200m_SA_all	Bacteria	Proteobacteria	Gammaproteobacteria	Oceanospirillales	Halomonadaceae	Halomonas
AB-606_L04_Cp_11.2_bact_NADW_3200m_SA_all	Bacteria	Proteobacteria	Gammaproteobacteria	Oceanospirillales	Halomonadaceae	Halomonas
AB-606_M08_Cp_13.1_bact_NADW_3200m_SA_all	Bacteria	Proteobacteria	Gammaproteobacteria	Oceanospirillales	Halomonadaceae	Halomonas
AB-606_N03_Cp_14.6_bact_NADW_3200m_SA_all	Bacteria	Proteobacteria	Gammaproteobacteria	Oceanospirillales	Halomonadaceae	Halomonas
AB-606_O13_Cp_12.9_bact_NADW_3200m_SA_all	Bacteria	Proteobacteria	Gammaproteobacteria	Oceanospirillales	Halomonadaceae	Halomonas
AB-606_C09_Cp_11.0_bact_NADW_3200m_SA_all	Bacteria	Proteobacteria	Gammaproteobacteria	Oceanospirillales	Oceanospirillaceae	Oceanobacter
AB-629_O19_Cp_7.4_bact_OMZ_511m_NA_all	Bacteria	Proteobacteria	Gammaproteobacteria	Oceanospirillales	Oceanospirillaceae	Pseudospirillum
AB-214_G21_Cp_15.9_bact_MDW_3000m_MED_HNA	Bacteria	Proteobacteria	Gammaproteobacteria	Oceanospirillales	Oceanospirillaceae	Unknown Oceanospirillaceae genus
AAA292_O03_Cp_6.3_bact_OMZ_200m_HOT_LNA	Bacteria	Proteobacteria	Gammaproteobacteria	Oceanospirillales	SAR86 clade
AAA292_O17_Cp_7.6_bact_OMZ_200m_HOT_LNA	Bacteria	Proteobacteria	Gammaproteobacteria	Oceanospirillales	SAR86 clade
AB-606_L21_Cp_10.1_bact_NADW_3200m_SA_all	Bacteria	Proteobacteria	Gammaproteobacteria	Thiotrichales	Piscirickettsiaceae	Methylophaga
AB-606_A03_Cp_8.1_bact_NADW_3200m_SA_all	Bacteria	Proteobacteria	Gammaproteobacteria	Thiotrichales	Piscirickettsiaceae	Methylophaga	Methylophaga marina
AB-606_B10_Cp_10.4_bact_NADW_3200m_SA_all	Bacteria	Proteobacteria	Gammaproteobacteria	Thiotrichales	Piscirickettsiaceae	Methylophaga	Methylophaga marina
AB-606_C05_Cp_9.2_bact_NADW_3200m_SA_all	Bacteria	Proteobacteria	Gammaproteobacteria	Thiotrichales	Piscirickettsiaceae	Methylophaga	Methylophaga marina
AB-606_C06_Cp_9.4_bact_NADW_3200m_SA_all	Bacteria	Proteobacteria	Gammaproteobacteria	Thiotrichales	Piscirickettsiaceae	Methylophaga	Methylophaga marina
AB-606_D15_Cp_9.4_bact_NADW_3200m_SA_all	Bacteria	Proteobacteria	Gammaproteobacteria	Thiotrichales	Piscirickettsiaceae	Methylophaga	Methylophaga marina
AB-606_E04_Cp_9.2_bact_NADW_3200m_SA_all	Bacteria	Proteobacteria	Gammaproteobacteria	Thiotrichales	Piscirickettsiaceae	Methylophaga	Methylophaga marina
AB-606_E15_Cp_9.8_bact_NADW_3200m_SA_all	Bacteria	Proteobacteria	Gammaproteobacteria	Thiotrichales	Piscirickettsiaceae	Methylophaga	Methylophaga marina
AB-606_G15_Cp_8.9_bact_NADW_3200m_SA_all	Bacteria	Proteobacteria	Gammaproteobacteria	Thiotrichales	Piscirickettsiaceae	Methylophaga	Methylophaga marina
AB-606_M13_Cp_9.5_bact_NADW_3200m_SA_all	Bacteria	Proteobacteria	Gammaproteobacteria	Thiotrichales	Piscirickettsiaceae	Methylophaga	Methylophaga marina
AB-606_N18_Cp_7.8_bact_NADW_3200m_SA_all	Bacteria	Proteobacteria	Gammaproteobacteria	Thiotrichales	Piscirickettsiaceae	Methylophaga	Methylophaga marina
AAA290_M20_Cp_11.6_bact_OMZ_200m_HOT_HNA	Bacteria	Proteobacteria	Gammaproteobacteria	Xanthomonadales	Sinobacteraceae
AC-337_B16_Cp_10.2_bact_CDW_3000m_P26_all_seq	Bacteria	PAUC34f
AC-312_P07_Cp_7.0_bact_PSAIW_1000m_P26_all	Bacteria	Candidate Division Caldithrix	LCP-89
AB-679_O14_Cp_11.7_bact_ESPIW_600m_CHI_all	Bacteria	Gemmatimonadetes	Gemmatimonadetes (class)	BD2-11 terrestrial group
AC-407_B03_Cp_10.1_bact_AABW_1202m_OGA_all	Bacteria	Gemmatimonadetes	Gemmatimonadetes (class)	BD2-11 terrestrial group
AC-407_P07_Cp_8.6_bact_AABW_1202m_OGA_all	Bacteria	Halanaerobiales phylum incertae sedis	Halanaerobiales class incertae sedis	Unknown Halanaerobiales class incertae sedis order
AC-409_C03_Cp_4.7_bact_AAIW_750m_OGA_all	Bacteria	Halanaerobiales phylum incertae sedis	Halanaerobiales class incertae sedis	Unknown Halanaerobiales class incertae sedis order
AB-633_C02_Cp_7.0_bact_NADW_2750m_NA_all	Bacteria	SAR406 clade(Marine group A)
AB-633_K15_Cp_7.5_bact_NADW_2750m_NA_all	Bacteria	SAR406 clade(Marine group A)
AB-633_O18_Cp_6.0_bact_NADW_2750m_NA_all	Bacteria	SAR406 clade(Marine group A)
AB-637_A09_Cp_6.3_bact_AABW_5000m_NA_all	Bacteria	SAR406 clade(Marine group A)
AB-637_G04_Cp_7.1_bact_AABW_5000m_NA_all	Bacteria	SAR406 clade(Marine group A)
AB-637_I09_Cp_5.7_bact_AABW_5000m_NA_all	Bacteria	SAR406 clade(Marine group A)
AB-637_K02_Cp_5.8_bact_AABW_5000m_NA_all	Bacteria	SAR406 clade(Marine group A)
AB-637_P22_Cp_6.8_bact_AABW_5000m_NA_all	Bacteria	SAR406 clade(Marine group A)
AB-663_C11_Cp_8.0_bact_AACDW_400m_ANT_all	Bacteria	SAR406 clade(Marine group A)
AB-663_J14_Cp_7.7_bact_AACDW_400m_ANT_all	Bacteria	SAR406 clade(Marine group A)
AC-312_D09_Cp_6.3_bact_PSAIW_1000m_P26_all	Bacteria	SAR406 clade(Marine group A)
AC-312_E04_Cp_7.4_bact_PSAIW_1000m_P26_all	Bacteria	SAR406 clade(Marine group A)
AC-312_G14_Cp_7.7_bact_PSAIW_1000m_P26_all	Bacteria	SAR406 clade(Marine group A)
AC-312_N07_Cp_6.7_bact_PSAIW_1000m_P26_all	Bacteria	SAR406 clade(Marine group A)
AC-312_N10_Cp_8.2_bact_PSAIW_1000m_P26_all	Bacteria	SAR406 clade(Marine group A)
AC-312_P08_Cp_7.4_bact_PSAIW_1000m_P26_all	Bacteria	SAR406 clade(Marine group A)
AC-337_C06_Cp_6.2_bact_CDW_3000m_P26_all	Bacteria	SAR406 clade(Marine group A)
AC-337_E02_Cp_5.8_bact_CDW_3000m_P26_all	Bacteria	SAR406 clade(Marine group A)
AC-337_K10_Cp_7.4_bact_CDW_3000m_P26_all	Bacteria	SAR406 clade(Marine group A)
AB-633_J16_Cp_10.3_bact_NADW_2750m_NA_all	Bacteria	Verrucomicrobia	Arctic97B-4 marine group
AB-637_D08_Cp_10.9_bact_AABW_5000m_NA_all	Bacteria	Verrucomicrobia	Arctic97B-4 marine group
AB-637_E06_Cp_10.3_bact_AABW_5000m_NA_all	Bacteria	Verrucomicrobia	Arctic97B-4 marine group
AB-637_J04_Cp_9.7_bact_AABW_5000m_NA_all	Bacteria	Verrucomicrobia	Arctic97B-4 marine group
AB-637_M10_Cp_9.8_bact_AABW_5000m_NA_all	Bacteria	Verrucomicrobia	Arctic97B-4 marine group
AB-663_A23_Cp_8.0_bact_AACDW_400m_ANT_all	Bacteria	Verrucomicrobia	Arctic97B-4 marine group
AB-663_N02_Cp_8.4_bact_AACDW_400m_ANT_all	Bacteria	Verrucomicrobia	Arctic97B-4 marine group
AB-663_N13_Cp_11.4_bact_AACDW_400m_ANT_all	Bacteria	Verrucomicrobia	Arctic97B-4 marine group
AB-663_O13_Cp_9.3_bact_AACDW_400m_ANT_all	Bacteria	Verrucomicrobia	Arctic97B-4 marine group
AC-312_D05_Cp_11.6_bact_PSAIW_1000m_P26_all	Bacteria	Verrucomicrobia	Arctic97B-4 marine group
AC-312_N19_Cp_9.5_bact_PSAIW_1000m_P26_all	Bacteria	Verrucomicrobia	Arctic97B-4 marine group
AC-312_O22_Cp_11.3_bact_PSAIW_1000m_P26_all	Bacteria	Verrucomicrobia	Arctic97B-4 marine group
AC-312_P03_Cp_8.3_bact_PSAIW_1000m_P26_all	Bacteria	Verrucomicrobia	Arctic97B-4 marine group
AC-337_A09_Cp_11.0_bact_CDW_3000m_P26_all	Bacteria	Verrucomicrobia	Arctic97B-4 marine group
AC-337_A14_Cp_10.6_bact_CDW_3000m_P26_all	Bacteria	Verrucomicrobia	Arctic97B-4 marine group
AC-337_J20_Cp_12.6_bact_CDW_3000m_P26_all	Bacteria	Verrucomicrobia	Arctic97B-4 marine group
AC-337_K21_Cp_9.6_bact_CDW_3000m_P26_all	Bacteria	Verrucomicrobia	Arctic97B-4 marine group
AC-337_P19_Cp_10.9_bact_CDW_3000m_P26_all	Bacteria	Verrucomicrobia	Arctic97B-4 marine group
AC-409_M04_Cp_7.7_bact_AAIW_750m_OGA_all	Bacteria	Verrucomicrobia	Arctic97B-4 marine group
AB-663_P16_Cp_9.1_bact_AACDW_400m_ANT_all	Bacteria	Verrucomicrobia	Opitutae	A714019
AB-663_I16_Cp_11.3_bact_AACDW_400m_ANT_all	Bacteria	Verrucomicrobia	Opitutae	MB11C04 marine group
AB-663_M18_Cp_9.7_bact_AACDW_400m_ANT_all	Bacteria	Verrucomicrobia	Opitutae	MB11C04 marine group
AC-337_B10_Cp_13.2_bact_CDW_3000m_P26_all	Bacteria	Verrucomicrobia	Opitutae	MB11C04 marine group
AC-312_N20_Cp_15.2_bact_PSAIW_1000m_P26_all_seq	Bacteria	Actinobacteria	Acidimicrobiia	Acidimicrobiales	Sva0996 marine group
AC-407_O06_Cp_7.1_bact_AABW_1202m_OGA_all	Bacteria	Bacteroidetes	Cytophagia	Cytophagales	Flammeovirgaceae
AB-679_G03_Cp_5.5_bact_ESPIW_600m_CHI_all	Bacteria	Bacteroidetes	Cytophagia	Cytophagales	Flammeovirgaceae	Fulvivirga
AC-409_B10_Cp_7.2_bact_AAIW_750m_OGA_all	Bacteria	Bacteroidetes	Cytophagia	Cytophagales	Flammeovirgaceae	Marinoscillum
AB-637_O19_Cp_5.6_bact_AABW_5000m_NA_all	Bacteria	Bacteroidetes	Flavobacteria	Flavobacteriales	NS9 marine group
AB-663_J03_Cp_7.7_bact_AACDW_400m_ANT_all	Bacteria	Bacteroidetes	Flavobacteria	Flavobacteriales	NS9 marine group
AB-663_M03_Cp_8.0_bact_AACDW_400m_ANT_all	Bacteria	Bacteroidetes	Flavobacteria	Flavobacteriales	NS9 marine group
AC-407_C03_Cp_4.7_bact_AABW_1202m_OGA_all	Bacteria	Bacteroidetes	Flavobacteria	Flavobacteriales	NS9 marine group
AB-637_I20_Cp_6.2_bact_AABW_5000m_NA_all	Bacteria	Bacteroidetes	Flavobacteria	Flavobacteriales	Flavobacteriaceae
AB-637_P15_Cp_5.0_bact_AABW_5000m_NA_all	Bacteria	Bacteroidetes	Flavobacteria	Flavobacteriales	Cryomorphaceae	Owenweeksia
AB-663_K23_Cp_5.4_bact_AACDW_400m_ANT_all	Bacteria	Cyanobacteria	Cyanobacteria (class)	Unknown Cyanobacteria (class) order
AC-409_G14_Cp_9.6_bact_AAIW_750m_OGA_all	Bacteria	Chloroflexi	Anaerolineae
AB-633_D13_Cp_6.7_bact_NADW_2750m_NA_all	Bacteria	Chloroflexi	Chloroflexi Subdivision 5 - SAR202 clade
AB-633_E22_Cp_11.8_bact_NADW_2750m_NA_all	Bacteria	Chloroflexi	Chloroflexi Subdivision 5 - SAR202 clade
AB-633_K16_Cp_7.3_bact_NADW_2750m_NA_all	Bacteria	Chloroflexi	Chloroflexi Subdivision 5 - SAR202 clade
AB-633_M15_Cp_6.7_bact_NADW_2750m_NA_all	Bacteria	Chloroflexi	Chloroflexi Subdivision 5 - SAR202 clade
AB-633_N22_Cp_12.9_bact_NADW_2750m_NA_all	Bacteria	Chloroflexi	Chloroflexi Subdivision 5 - SAR202 clade
AB-633_P16_Cp_10.6_bact_NADW_2750m_NA_all	Bacteria	Chloroflexi	Chloroflexi Subdivision 5 - SAR202 clade
AB-637_A17_Cp_11.7_bact_AABW_5000m_NA_all	Bacteria	Chloroflexi	Chloroflexi Subdivision 5 - SAR202 clade
AB-637_F03_Cp_7.8_bact_AABW_5000m_NA_all	Bacteria	Chloroflexi	Chloroflexi Subdivision 5 - SAR202 clade
AB-637_F21_Cp_8.8_bact_AABW_5000m_NA_all	Bacteria	Chloroflexi	Chloroflexi Subdivision 5 - SAR202 clade
AB-637_L09_Cp_13.0_bact_AABW_5000m_NA_all	Bacteria	Chloroflexi	Chloroflexi Subdivision 5 - SAR202 clade
AB-637_L14_Cp_10.5_bact_AABW_5000m_NA_all	Bacteria	Chloroflexi	Chloroflexi Subdivision 5 - SAR202 clade
AB-679_I09_Cp_6.8_bact_ESPIW_600m_CHI_all	Bacteria	Chloroflexi	Chloroflexi Subdivision 5 - SAR202 clade
AC-312_J06_Cp_13.4_bact_PSAIW_1000m_P26_all	Bacteria	Chloroflexi	Chloroflexi Subdivision 5 - SAR202 clade
AC-312_M19_Cp_6.4_bact_PSAIW_1000m_P26_all	Bacteria	Chloroflexi	Chloroflexi Subdivision 5 - SAR202 clade
AC-312_N09_Cp_7.0_bact_PSAIW_1000m_P26_all	Bacteria	Chloroflexi	Chloroflexi Subdivision 5 - SAR202 clade
AC-337_D02_Cp_7.2_bact_CDW_3000m_P26_all	Bacteria	Chloroflexi	Chloroflexi Subdivision 5 - SAR202 clade
AC-337_F21_Cp_8.5_bact_CDW_3000m_P26_all	Bacteria	Chloroflexi	Chloroflexi Subdivision 5 - SAR202 clade
AC-407_C02_Cp_11.7_bact_AABW_1202m_OGA_all	Bacteria	Chloroflexi	Chloroflexi Subdivision 5 - SAR202 clade
AC-407_N05_Cp_10.3_bact_AABW_1202m_OGA_all	Bacteria	Chloroflexi	Chloroflexi Subdivision 5 - SAR202 clade
AC-407_O22_Cp_8.0_bact_AABW_1202m_OGA_all	Bacteria	Chloroflexi	Chloroflexi Subdivision 5 - SAR202 clade
AC-409_J13_Cp_6.2_bact_AAIW_750m_OGA_all	Bacteria	Chloroflexi	Chloroflexi Subdivision 5 - SAR202 clade
AC-407_C10_Cp_11.1_bact_AABW_1202m_OGA_all	Bacteria	Planctomycetes	Pla3 lineage
AC-409_K19_Cp_11.8_bact_AAIW_750m_OGA_all	Bacteria	Planctomycetes	Pla3 lineage
AB-633_J04_Cp_11.5_bact_NADW_2750m_NA_all	Bacteria	Planctomycetes	Phycisphaerae	Phycisphaerales	Phycisphaeraceae
AB-633_I21_Cp_12.9_bact_NADW_2750m_NA_all	Bacteria	Planctomycetes	Phycisphaerae	Phycisphaerales	Unknown Phycisphaerales family
AC-407_K21_Cp_9.7_bact_AABW_1202m_OGA_all	Bacteria	Planctomycetes	Phycisphaerae	Unknown Phycisphaerae order
AB-663_A20_Cp_8.3_bact_AACDW_400m_ANT_all_seq	Bacteria	Planctomycetes	Planctomycetacia	Planctomycetales	Planctomycetaceae	Rhodopirellula
AB-663_G19_Cp_9.8_bact_AACDW_400m_ANT_all	Bacteria	Planctomycetes	Planctomycetacia	Planctomycetales	Planctomycetaceae	Rhodopirellula
AB-663_N19_Cp_9.9_bact_AACDW_400m_ANT_all_seq	Bacteria	Planctomycetes	Planctomycetacia	Planctomycetales	Planctomycetaceae	Rhodopirellula
AB-637_D02_Cp_11.9_bact_AABW_5000m_NA_all	Bacteria	Planctomycetes	Planctomycetacia	Planctomycetales	Planctomycetaceae	Planctomyces
AC-407_M22_Cp_11.0_bact_AABW_1202m_OGA_all	Bacteria	Planctomycetes	Planctomycetacia	Planctomycetales	Planctomycetaceae	Blastopirellula
AC-407_M23_Cp_13.4_bact_AABW_1202m_OGA_all	Bacteria	Planctomycetes	Planctomycetacia	Planctomycetales	Unknown Planctomycetales family
AC-409_N17_Cp_13.3_bact_AAIW_750m_OGA_all	Bacteria	Acidobacteria	RB25	Acidobacteria group 26
AB-637_B03_Cp_12.5_bact_AABW_5000m_NA_all	Bacteria	Acidobacteria	Acidobacteria (class)	Acidobacteria group 21 (BPC102)
AB-637_J23_Cp_12.7_bact_AABW_5000m_NA_all	Bacteria	Acidobacteria	Acidobacteria (class)	Acidobacteria group 21 (BPC102)
AC-409_J15_Cp_10.7_bact_AAIW_750m_OGA_all	Bacteria	Acidobacteria	Acidobacteria (class)	Acidobacteria group 21 (BPC102)
AC-409_B23_Cp_13.4_bact_AAIW_750m_OGA_all	Bacteria	Acidobacteria	Acidobacteria (class)	Acidobacteria group 5
AC-407_F10_Cp_10.6_bact_AABW_1202m_OGA_all	Bacteria	Acidobacteria	Acidobacteria (class)	Acidobacteria group 13 - KF-JG30-18
AC-407_P03_Cp_6.8_bact_AABW_1202m_OGA_all	Bacteria	Acidobacteria	Acidobacteria (class)	Acidobacteria group 13 - KF-JG30-18
AB-633_D15_Cp_11.5_bact_NADW_2750m_NA_all	Bacteria	Acidobacteria	Acidobacteria (class)	Acidobacteria group 6 (DA023)
AB-633_N09_Cp_10.1_bact_NADW_2750m_NA_all_seq	Bacteria	Acidobacteria	Acidobacteria (class)	Acidobacteria group 6 (DA023)
AC-409_A14_Cp_9.9_bact_AAIW_750m_OGA_all	Bacteria	Acidobacteria	Acidobacteria (class)	Acidobacteria group 6 (DA023)
AC-409_B06_Cp_8.4_bact_AAIW_750m_OGA_all	Bacteria	Acidobacteria	Acidobacteria (class)	Acidobacteria group 6 (DA023)
AC-409_B21_Cp_8.6_bact_AAIW_750m_OGA_all	Bacteria	Acidobacteria	Acidobacteria (class)	Acidobacteria group 6 (DA023)
AB-637_D19_Cp_10.7_bact_AABW_5000m_NA_all	Bacteria	Proteobacteria	SPOTSOCT00	5m83
AB-637_E04_Cp_9.6_bact_AABW_5000m_NA_all	Bacteria	Proteobacteria	JTB23
AC-409_P22_Cp_7.4_bact_AAIW_750m_OGA_all	Bacteria	Proteobacteria	JTB23
AC-409_L23_Cp_10.6_bact_AAIW_750m_OGA_all	Bacteria	Proteobacteria	Deltaproteobacteria	Nitrospinaceae order incertae sedis	Nitrospinaceae
AB-633_P15_Cp_7.5_bact_NADW_2750m_NA_all	Bacteria	Proteobacteria	Deltaproteobacteria	Nitrospinaceae order incertae sedis	Nitrospinaceae	Nitrospina
AB-637_C05_Cp_7.9_bact_AABW_5000m_NA_all	Bacteria	Proteobacteria	Deltaproteobacteria	Nitrospinaceae order incertae sedis	Nitrospinaceae	Nitrospina
AB-637_D22_Cp_6.0_bact_AABW_5000m_NA_all	Bacteria	Proteobacteria	Deltaproteobacteria	Nitrospinaceae order incertae sedis	Nitrospinaceae	Nitrospina
AB-663_J17_Cp_7.9_bact_AACDW_400m_ANT_all	Bacteria	Proteobacteria	Deltaproteobacteria	Nitrospinaceae order incertae sedis	Nitrospinaceae	Nitrospina
AB-663_L09_Cp_8.1_bact_AACDW_400m_ANT_all	Bacteria	Proteobacteria	Deltaproteobacteria	Nitrospinaceae order incertae sedis	Nitrospinaceae	Nitrospina
AB-663_M19_Cp_7.4_bact_AACDW_400m_ANT_all	Bacteria	Proteobacteria	Deltaproteobacteria	Nitrospinaceae order incertae sedis	Nitrospinaceae	Nitrospina
AB-663_P05_Cp_6.2_bact_AACDW_400m_ANT_all	Bacteria	Proteobacteria	Deltaproteobacteria	Nitrospinaceae order incertae sedis	Nitrospinaceae	Nitrospina
AB-679_F13_Cp_8.2_bact_ESPIW_600m_CHI_all	Bacteria	Proteobacteria	Deltaproteobacteria	Nitrospinaceae order incertae sedis	Nitrospinaceae	Nitrospina
AB-679_I05_Cp_6.9_bact_ESPIW_600m_CHI_all	Bacteria	Proteobacteria	Deltaproteobacteria	Nitrospinaceae order incertae sedis	Nitrospinaceae	Nitrospina
AC-312_D19_Cp_8.0_bact_PSAIW_1000m_P26_all	Bacteria	Proteobacteria	Deltaproteobacteria	Nitrospinaceae order incertae sedis	Nitrospinaceae	Nitrospina
AC-312_F10_Cp_7.6_bact_PSAIW_1000m_P26_all	Bacteria	Proteobacteria	Deltaproteobacteria	Nitrospinaceae order incertae sedis	Nitrospinaceae	Nitrospina
AC-312_I16_Cp_7.5_bact_PSAIW_1000m_P26_all	Bacteria	Proteobacteria	Deltaproteobacteria	Nitrospinaceae order incertae sedis	Nitrospinaceae	Nitrospina
AC-312_N03_Cp_10.7_bact_PSAIW_1000m_P26_all	Bacteria	Proteobacteria	Deltaproteobacteria	Nitrospinaceae order incertae sedis	Nitrospinaceae	Nitrospina
AC-312_N23_Cp_8.9_bact_PSAIW_1000m_P26_all	Bacteria	Proteobacteria	Deltaproteobacteria	Nitrospinaceae order incertae sedis	Nitrospinaceae	Nitrospina
AC-407_A05_Cp_5.5_bact_AABW_1202m_OGA_all	Bacteria	Proteobacteria	Deltaproteobacteria	Nitrospinaceae order incertae sedis	Nitrospinaceae	Nitrospina
AC-407_I08_Cp_8.3_bact_AABW_1202m_OGA_all	Bacteria	Proteobacteria	Deltaproteobacteria	Nitrospinaceae order incertae sedis	Nitrospinaceae	Nitrospina
AC-409_J21_Cp_6.9_bact_AAIW_750m_OGA_all	Bacteria	Proteobacteria	Deltaproteobacteria	Nitrospinaceae order incertae sedis	Nitrospinaceae	Nitrospina
AB-633_B03_Cp_5.9_bact_NADW_2750m_NA_all	Bacteria	Proteobacteria	Deltaproteobacteria	SAR324 clade(Marine group B)
AB-633_J07_Cp_7.3_bact_NADW_2750m_NA_all	Bacteria	Proteobacteria	Deltaproteobacteria	SAR324 clade(Marine group B)
AB-633_K14_Cp_6.4_bact_NADW_2750m_NA_all	Bacteria	Proteobacteria	Deltaproteobacteria	SAR324 clade(Marine group B)
AB-633_O04_Cp_5.7_bact_NADW_2750m_NA_all	Bacteria	Proteobacteria	Deltaproteobacteria	SAR324 clade(Marine group B)
AB-633_O15_Cp_6.5_bact_NADW_2750m_NA_all	Bacteria	Proteobacteria	Deltaproteobacteria	SAR324 clade(Marine group B)
AB-637_A20_Cp_4.8_bact_AABW_5000m_NA_all	Bacteria	Proteobacteria	Deltaproteobacteria	SAR324 clade(Marine group B)
AB-637_G18_Cp_9.6_bact_AABW_5000m_NA_all	Bacteria	Proteobacteria	Deltaproteobacteria	SAR324 clade(Marine group B)
AB-637_L23_Cp_5.0_bact_AABW_5000m_NA_all	Bacteria	Proteobacteria	Deltaproteobacteria	SAR324 clade(Marine group B)
AB-663_A14_Cp_7.7_bact_AACDW_400m_ANT_all	Bacteria	Proteobacteria	Deltaproteobacteria	SAR324 clade(Marine group B)
AB-663_A16_Cp_6.3_bact_AACDW_400m_ANT_all	Bacteria	Proteobacteria	Deltaproteobacteria	SAR324 clade(Marine group B)
AB-663_B18_Cp_7.0_bact_AACDW_400m_ANT_all	Bacteria	Proteobacteria	Deltaproteobacteria	SAR324 clade(Marine group B)
AB-663_D06_Cp_6.9_bact_AACDW_400m_ANT_all	Bacteria	Proteobacteria	Deltaproteobacteria	SAR324 clade(Marine group B)
AB-663_E05_Cp_6.4_bact_AACDW_400m_ANT_all	Bacteria	Proteobacteria	Deltaproteobacteria	SAR324 clade(Marine group B)
AB-663_F08_Cp_7.1_bact_AACDW_400m_ANT_all	Bacteria	Proteobacteria	Deltaproteobacteria	SAR324 clade(Marine group B)
AB-663_L03_Cp_5.5_bact_AACDW_400m_ANT_all	Bacteria	Proteobacteria	Deltaproteobacteria	SAR324 clade(Marine group B)
AB-663_L17_Cp_6.0_bact_AACDW_400m_ANT_all	Bacteria	Proteobacteria	Deltaproteobacteria	SAR324 clade(Marine group B)
AB-663_M05_Cp_7.5_bact_AACDW_400m_ANT_all	Bacteria	Proteobacteria	Deltaproteobacteria	SAR324 clade(Marine group B)
AB-663_M13_Cp_6.7_bact_AACDW_400m_ANT_all	Bacteria	Proteobacteria	Deltaproteobacteria	SAR324 clade(Marine group B)
AB-663_P21_Cp_5.9_bact_AACDW_400m_ANT_all	Bacteria	Proteobacteria	Deltaproteobacteria	SAR324 clade(Marine group B)
AB-679_A07_Cp_5.2_bact_ESPIW_600m_CHI_all	Bacteria	Proteobacteria	Deltaproteobacteria	SAR324 clade(Marine group B)
AB-679_A13_Cp_5.5_bact_ESPIW_600m_CHI_all	Bacteria	Proteobacteria	Deltaproteobacteria	SAR324 clade(Marine group B)
AB-679_I10_Cp_6.8_bact_ESPIW_600m_CHI_all	Bacteria	Proteobacteria	Deltaproteobacteria	SAR324 clade(Marine group B)
AC-312_E03_Cp_7.3_bact_PSAIW_1000m_P26_all	Bacteria	Proteobacteria	Deltaproteobacteria	SAR324 clade(Marine group B)
AC-312_E16_Cp_9.2_bact_PSAIW_1000m_P26_all	Bacteria	Proteobacteria	Deltaproteobacteria	SAR324 clade(Marine group B)
AC-312_F05_Cp_8.0_bact_PSAIW_1000m_P26_all	Bacteria	Proteobacteria	Deltaproteobacteria	SAR324 clade(Marine group B)
AC-312_F14_Cp_8.0_bact_PSAIW_1000m_P26_all	Bacteria	Proteobacteria	Deltaproteobacteria	SAR324 clade(Marine group B)
AC-312_G19_Cp_10.1_bact_PSAIW_1000m_P26_all	Bacteria	Proteobacteria	Deltaproteobacteria	SAR324 clade(Marine group B)
AC-312_I05_Cp_7.5_bact_PSAIW_1000m_P26_all	Bacteria	Proteobacteria	Deltaproteobacteria	SAR324 clade(Marine group B)
AC-312_J15_Cp_8.9_bact_PSAIW_1000m_P26_all	Bacteria	Proteobacteria	Deltaproteobacteria	SAR324 clade(Marine group B)
AC-312_M18_Cp_6.8_bact_PSAIW_1000m_P26_all	Bacteria	Proteobacteria	Deltaproteobacteria	SAR324 clade(Marine group B)
AC-337_C05_Cp_7.8_bact_CDW_3000m_P26_all	Bacteria	Proteobacteria	Deltaproteobacteria	SAR324 clade(Marine group B)
AC-337_D15_Cp_6.1_bact_CDW_3000m_P26_all	Bacteria	Proteobacteria	Deltaproteobacteria	SAR324 clade(Marine group B)
AC-337_G17_Cp_12.0_bact_CDW_3000m_P26_all	Bacteria	Proteobacteria	Deltaproteobacteria	SAR324 clade(Marine group B)
AC-337_M17_Cp_8.2_bact_CDW_3000m_P26_all	Bacteria	Proteobacteria	Deltaproteobacteria	SAR324 clade(Marine group B)
AC-407_B07_Cp_7.3_bact_AABW_1202m_OGA_all	Bacteria	Proteobacteria	Deltaproteobacteria	SAR324 clade(Marine group B)
AC-407_B15_Cp_7.8_bact_AABW_1202m_OGA_all	Bacteria	Proteobacteria	Deltaproteobacteria	SAR324 clade(Marine group B)
AC-407_C14_Cp_8.0_bact_AABW_1202m_OGA_all	Bacteria	Proteobacteria	Deltaproteobacteria	SAR324 clade(Marine group B)
AC-407_E07_Cp_6.4_bact_AABW_1202m_OGA_all	Bacteria	Proteobacteria	Deltaproteobacteria	SAR324 clade(Marine group B)
AC-407_E10_Cp_7.8_bact_AABW_1202m_OGA_all	Bacteria	Proteobacteria	Deltaproteobacteria	SAR324 clade(Marine group B)
AC-407_G09_Cp_6.7_bact_AABW_1202m_OGA_all	Bacteria	Proteobacteria	Deltaproteobacteria	SAR324 clade(Marine group B)
AC-407_I03_Cp_6.1_bact_AABW_1202m_OGA_all	Bacteria	Proteobacteria	Deltaproteobacteria	SAR324 clade(Marine group B)
AC-407_J16_Cp_4.8_bact_AABW_1202m_OGA_all	Bacteria	Proteobacteria	Deltaproteobacteria	SAR324 clade(Marine group B)
AC-407_L22_Cp_5.5_bact_AABW_1202m_OGA_all	Bacteria	Proteobacteria	Deltaproteobacteria	SAR324 clade(Marine group B)
AC-407_M19_Cp_6.7_bact_AABW_1202m_OGA_all	Bacteria	Proteobacteria	Deltaproteobacteria	SAR324 clade(Marine group B)
AC-407_N23_Cp_8.6_bact_AABW_1202m_OGA_all	Bacteria	Proteobacteria	Deltaproteobacteria	SAR324 clade(Marine group B)
AC-409_A10_Cp_5.1_bact_AAIW_750m_OGA_all	Bacteria	Proteobacteria	Deltaproteobacteria	SAR324 clade(Marine group B)
AC-409_B19_Cp_7.2_bact_AAIW_750m_OGA_all	Bacteria	Proteobacteria	Deltaproteobacteria	SAR324 clade(Marine group B)
AC-409_C19_Cp_5.6_bact_AAIW_750m_OGA_all	Bacteria	Proteobacteria	Deltaproteobacteria	SAR324 clade(Marine group B)
AC-409_D19_Cp_7.6_bact_AAIW_750m_OGA_all	Bacteria	Proteobacteria	Deltaproteobacteria	SAR324 clade(Marine group B)
AC-409_E03_Cp_5.5_bact_AAIW_750m_OGA_all	Bacteria	Proteobacteria	Deltaproteobacteria	SAR324 clade(Marine group B)
AC-409_E08_Cp_5.6_bact_AAIW_750m_OGA_all	Bacteria	Proteobacteria	Deltaproteobacteria	SAR324 clade(Marine group B)
AC-409_F16_Cp_4.6_bact_AAIW_750m_OGA_all	Bacteria	Proteobacteria	Deltaproteobacteria	SAR324 clade(Marine group B)
AC-409_G08_Cp_7.6_bact_AAIW_750m_OGA_all	Bacteria	Proteobacteria	Deltaproteobacteria	SAR324 clade(Marine group B)
AC-409_K11_Cp_6.5_bact_AAIW_750m_OGA_all	Bacteria	Proteobacteria	Deltaproteobacteria	SAR324 clade(Marine group B)
AC-409_M05_Cp_5.5_bact_AAIW_750m_OGA_all	Bacteria	Proteobacteria	Deltaproteobacteria	SAR324 clade(Marine group B)
AC-409_M09_Cp_6.2_bact_AAIW_750m_OGA_all	Bacteria	Proteobacteria	Deltaproteobacteria	SAR324 clade(Marine group B)
AC-409_P15_Cp_6.6_bact_AAIW_750m_OGA_all	Bacteria	Proteobacteria	Deltaproteobacteria	SAR324 clade(Marine group B)
AB-663_L11_Cp_8.6_bact_AACDW_400m_ANT_all	Bacteria	Proteobacteria	Deltaproteobacteria	Myxococcales	Nannocystineae
AC-312_P16_Cp_12.5_bact_PSAIW_1000m_P26_all	Bacteria	Proteobacteria	Deltaproteobacteria	Myxococcales	Nannocystineae
AC-312_M04_Cp_14.6_bact_PSAIW_1000m_P26_all	Bacteria	Proteobacteria	Alphaproteobacteria
AB-633_L11_Cp_10.2_bact_NADW_2750m_NA_all	Bacteria	Proteobacteria	Alphaproteobacteria	MNG3
AC-407_I14_Cp_7.7_bact_AABW_1202m_OGA_all	Bacteria	Proteobacteria	Alphaproteobacteria	MNG3
AB-637_O20_Cp_6.0_bact_AABW_5000m_NA_all	Bacteria	Proteobacteria	Alphaproteobacteria	Rickettsiales	S25-593
AB-663_G03_Cp_5.5_bact_AACDW_400m_ANT_all	Bacteria	Proteobacteria	Alphaproteobacteria	Rhodobacterales	Rhodobacteraceae
AB-633_B09_Cp_10.4_bact_NADW_2750m_NA_all	Bacteria	Proteobacteria	Alphaproteobacteria	Rhodospirillales	Rhodospirillaceae
AB-633_E03_Cp_11.9_bact_NADW_2750m_NA_all	Bacteria	Proteobacteria	Alphaproteobacteria	Rhodospirillales	Rhodospirillaceae
AB-633_M20_Cp_12.9_bact_NADW_2750m_NA_all	Bacteria	Proteobacteria	Alphaproteobacteria	Rhodospirillales	Rhodospirillaceae
AB-633_M23_Cp_6.6_bact_NADW_2750m_NA_all	Bacteria	Proteobacteria	Alphaproteobacteria	Rhodospirillales	Rhodospirillaceae
AB-633_P17_Cp_7.0_bact_NADW_2750m_NA_all	Bacteria	Proteobacteria	Alphaproteobacteria	Rhodospirillales	Rhodospirillaceae
AB-633_P23_Cp_11.2_bact_NADW_2750m_NA_all	Bacteria	Proteobacteria	Alphaproteobacteria	Rhodospirillales	Rhodospirillaceae
AB-637_B19_Cp_8.4_bact_AABW_5000m_NA_all	Bacteria	Proteobacteria	Alphaproteobacteria	Rhodospirillales	Rhodospirillaceae
AB-637_I06_Cp_12.9_bact_AABW_5000m_NA_all	Bacteria	Proteobacteria	Alphaproteobacteria	Rhodospirillales	Rhodospirillaceae
AB-637_O16_Cp_12.4_bact_AABW_5000m_NA_all	Bacteria	Proteobacteria	Alphaproteobacteria	Rhodospirillales	Rhodospirillaceae
AB-679_K11_Cp_10.4_bact_ESPIW_600m_CHI_all	Bacteria	Proteobacteria	Alphaproteobacteria	Rhodospirillales	Rhodospirillaceae
AC-337_F16_Cp_12.9_bact_CDW_3000m_P26_all	Bacteria	Proteobacteria	Alphaproteobacteria	Rhodospirillales	Rhodospirillaceae
AC-407_A17_Cp_7.3_bact_AABW_1202m_OGA_all	Bacteria	Proteobacteria	Alphaproteobacteria	Rhodospirillales	Rhodospirillaceae
AC-407_G21_Cp_12.8_bact_AABW_1202m_OGA_all	Bacteria	Proteobacteria	Alphaproteobacteria	Rhodospirillales	Rhodospirillaceae
AC-407_I05_Cp_12.9_bact_AABW_1202m_OGA_all	Bacteria	Proteobacteria	Alphaproteobacteria	Rhodospirillales	Rhodospirillaceae
AC-407_I23_Cp_12.9_bact_AABW_1202m_OGA_all	Bacteria	Proteobacteria	Alphaproteobacteria	Rhodospirillales	Rhodospirillaceae
AC-407_J02_Cp_11.8_bact_AABW_1202m_OGA_all	Bacteria	Proteobacteria	Alphaproteobacteria	Rhodospirillales	Rhodospirillaceae
AC-409_D21_Cp_7.0_bact_AAIW_750m_OGA_all	Bacteria	Proteobacteria	Alphaproteobacteria	Rhodospirillales	Rhodospirillaceae
AC-409_N05_Cp_7.3_bact_AAIW_750m_OGA_all	Bacteria	Proteobacteria	Alphaproteobacteria	Rhodospirillales	Rhodospirillaceae
AC-409_O17_Cp_6.4_bact_AAIW_750m_OGA_all	Bacteria	Proteobacteria	Alphaproteobacteria	Rhodospirillales	Rhodospirillaceae
AC-337_C22_Cp_7.0_bact_CDW_3000m_P26_all	Bacteria	Proteobacteria	Alphaproteobacteria	Rhodospirillales	Rhodospirillaceae	AEGEAN-169 marine group
AC-337_P14_Cp_8.1_bact_CDW_3000m_P26_all	Bacteria	Proteobacteria	Alphaproteobacteria	Rhodospirillales	Rhodospirillaceae	AEGEAN-169 marine group
AC-407_P18_Cp_10.0_bact_AABW_1202m_OGA_all	Bacteria	Proteobacteria	Alphaproteobacteria	Rhodospirillales	Rhodospirillaceae	AEGEAN-169 marine group
AB-637_O11_Cp_12.7_bact_AABW_5000m_NA_all	Bacteria	Proteobacteria	Alphaproteobacteria	Rhodospirillales	Rhodospirillaceae	Defluviicoccus
AB-663_G21_Cp_6.0_bact_AACDW_400m_ANT_all	Bacteria	Proteobacteria	Alphaproteobacteria	Rhodospirillales	Rhodospirillaceae	Defluviicoccus
AC-409_I06_Cp_10.1_bact_AAIW_750m_OGA_all	Bacteria	Proteobacteria	Alphaproteobacteria	Rhodospirillales	Rhodospirillaceae	Defluviicoccus
AC-409_M21_Cp_9.5_bact_AAIW_750m_OGA_all	Bacteria	Proteobacteria	Alphaproteobacteria	Rhodospirillales	Rhodospirillaceae	Defluviicoccus
AB-637_P03_Cp_12.3_bact_AABW_5000m_NA_all	Bacteria	Proteobacteria	Alphaproteobacteria	Rhodospirillales	Unknown Rhodospirillales family
AC-409_J02_Cp_5.8_bact_AAIW_750m_OGA_all	Bacteria	Proteobacteria	Alphaproteobacteria	Rhodospirillales	Unknown Rhodospirillales family
AB-633_K09_Cp_9.1_bact_NADW_2750m_NA_all	Bacteria	Proteobacteria	Alphaproteobacteria	SAR11 clade
AB-633_M06_Cp_8.3_bact_NADW_2750m_NA_all	Bacteria	Proteobacteria	Alphaproteobacteria	SAR11 clade
AB-663_C03_Cp_5.4_bact_AACDW_400m_ANT_all	Bacteria	Proteobacteria	Alphaproteobacteria	SAR11 clade
AB-663_F19_Cp_7.0_bact_AACDW_400m_ANT_all	Bacteria	Proteobacteria	Alphaproteobacteria	SAR11 clade
AB-663_G11_Cp_7.4_bact_AACDW_400m_ANT_all	Bacteria	Proteobacteria	Alphaproteobacteria	SAR11 clade
AB-663_J02_Cp_7.6_bact_AACDW_400m_ANT_all	Bacteria	Proteobacteria	Alphaproteobacteria	SAR11 clade
AB-663_K05_Cp_6.9_bact_AACDW_400m_ANT_all	Bacteria	Proteobacteria	Alphaproteobacteria	SAR11 clade
AB-663_O03_Cp_5.5_bact_AACDW_400m_ANT_all	Bacteria	Proteobacteria	Alphaproteobacteria	SAR11 clade
AC-312_O23_Cp_6.8_bact_PSAIW_1000m_P26_all	Bacteria	Proteobacteria	Alphaproteobacteria	SAR11 clade
AC-407_C16_Cp_8.2_bact_AABW_1202m_OGA_all	Bacteria	Proteobacteria	Alphaproteobacteria	SAR11 clade
AB-633_A04_Cp_6.4_bact_NADW_2750m_NA_all	Bacteria	Proteobacteria	Alphaproteobacteria	SAR11 clade	Deep 1
AB-633_I11_Cp_6.7_bact_NADW_2750m_NA_all	Bacteria	Proteobacteria	Alphaproteobacteria	SAR11 clade	Deep 1
AB-633_K05_Cp_5.3_bact_NADW_2750m_NA_all	Bacteria	Proteobacteria	Alphaproteobacteria	SAR11 clade	Deep 1
AB-633_O05_Cp_7.7_bact_NADW_2750m_NA_all	Bacteria	Proteobacteria	Alphaproteobacteria	SAR11 clade	Deep 1
AB-633_P10_Cp_7.8_bact_NADW_2750m_NA_all	Bacteria	Proteobacteria	Alphaproteobacteria	SAR11 clade	Deep 1
AB-633_P20_Cp_6.6_bact_NADW_2750m_NA_all	Bacteria	Proteobacteria	Alphaproteobacteria	SAR11 clade	Deep 1
AB-637_B18_Cp_9.4_bact_AABW_5000m_NA_all	Bacteria	Proteobacteria	Alphaproteobacteria	SAR11 clade	Deep 1
AB-637_F18_Cp_8.3_bact_AABW_5000m_NA_all	Bacteria	Proteobacteria	Alphaproteobacteria	SAR11 clade	Deep 1
AB-637_F22_Cp_5.1_bact_AABW_5000m_NA_all	Bacteria	Proteobacteria	Alphaproteobacteria	SAR11 clade	Deep 1
AB-637_G02_Cp_7.3_bact_AABW_5000m_NA_all	Bacteria	Proteobacteria	Alphaproteobacteria	SAR11 clade	Deep 1
AB-637_G09_Cp_6.9_bact_AABW_5000m_NA_all	Bacteria	Proteobacteria	Alphaproteobacteria	SAR11 clade	Deep 1
AB-637_K14_Cp_7.3_bact_AABW_5000m_NA_all	Bacteria	Proteobacteria	Alphaproteobacteria	SAR11 clade	Deep 1
AB-637_M15_Cp_5.2_bact_AABW_5000m_NA_all	Bacteria	Proteobacteria	Alphaproteobacteria	SAR11 clade	Deep 1
AB-637_O10_Cp_7.2_bact_AABW_5000m_NA_all	Bacteria	Proteobacteria	Alphaproteobacteria	SAR11 clade	Deep 1
AB-637_P17_Cp_5.2_bact_AABW_5000m_NA_all	Bacteria	Proteobacteria	Alphaproteobacteria	SAR11 clade	Deep 1
AB-663_E19_Cp_5.0_bact_AACDW_400m_ANT_all	Bacteria	Proteobacteria	Alphaproteobacteria	SAR11 clade	Deep 1
AB-679_O04_Cp_7.8_bact_ESPIW_600m_CHI_all	Bacteria	Proteobacteria	Alphaproteobacteria	SAR11 clade	Deep 1
AC-312_D23_Cp_7.0_bact_PSAIW_1000m_P26_all	Bacteria	Proteobacteria	Alphaproteobacteria	SAR11 clade	Deep 1
AC-409_P16_Cp_6.0_bact_AAIW_750m_OGA_all	Bacteria	Proteobacteria	Alphaproteobacteria	SAR11 clade	Deep 1
AB-633_B02_Cp_6.4_bact_NADW_2750m_NA_all	Bacteria	Proteobacteria	Alphaproteobacteria	SAR11 clade	Surface 1
AB-633_G03_Cp_7.3_bact_NADW_2750m_NA_all	Bacteria	Proteobacteria	Alphaproteobacteria	SAR11 clade	Surface 1
AB-633_J05_Cp_7.0_bact_NADW_2750m_NA_all	Bacteria	Proteobacteria	Alphaproteobacteria	SAR11 clade	Surface 1
AB-633_N04_Cp_8.2_bact_NADW_2750m_NA_all	Bacteria	Proteobacteria	Alphaproteobacteria	SAR11 clade	Surface 1
AB-633_N20_Cp_6.5_bact_NADW_2750m_NA_all	Bacteria	Proteobacteria	Alphaproteobacteria	SAR11 clade	Surface 1
AB-633_O09_Cp_7.8_bact_NADW_2750m_NA_all	Bacteria	Proteobacteria	Alphaproteobacteria	SAR11 clade	Surface 1
AB-637_F07_Cp_8.0_bact_AABW_5000m_NA_all	Bacteria	Proteobacteria	Alphaproteobacteria	SAR11 clade	Surface 1
AB-637_I05_Cp_6.6_bact_AABW_5000m_NA_all	Bacteria	Proteobacteria	Alphaproteobacteria	SAR11 clade	Surface 1
AB-637_K18_Cp_9.6_bact_AABW_5000m_NA_all	Bacteria	Proteobacteria	Alphaproteobacteria	SAR11 clade	Surface 1
AB-637_N15_Cp_6.5_bact_AABW_5000m_NA_all	Bacteria	Proteobacteria	Alphaproteobacteria	SAR11 clade	Surface 1
AB-637_O05_Cp_5.2_bact_AABW_5000m_NA_all	Bacteria	Proteobacteria	Alphaproteobacteria	SAR11 clade	Surface 1
AB-637_P10_Cp_5.0_bact_AABW_5000m_NA_all	Bacteria	Proteobacteria	Alphaproteobacteria	SAR11 clade	Surface 1
AB-637_P14_Cp_5.9_bact_AABW_5000m_NA_all	Bacteria	Proteobacteria	Alphaproteobacteria	SAR11 clade	Surface 1
AB-663_E10_Cp_6.5_bact_AACDW_400m_ANT_all	Bacteria	Proteobacteria	Alphaproteobacteria	SAR11 clade	Surface 1
AB-663_F03_Cp_7.2_bact_AACDW_400m_ANT_all	Bacteria	Proteobacteria	Alphaproteobacteria	SAR11 clade	Surface 1
AB-663_F10_Cp_5.6_bact_AACDW_400m_ANT_all	Bacteria	Proteobacteria	Alphaproteobacteria	SAR11 clade	Surface 1
AB-663_G02_Cp_7.8_bact_AACDW_400m_ANT_all	Bacteria	Proteobacteria	Alphaproteobacteria	SAR11 clade	Surface 1
AB-663_J11_Cp_5.4_bact_AACDW_400m_ANT_all	Bacteria	Proteobacteria	Alphaproteobacteria	SAR11 clade	Surface 1
AB-663_N16_Cp_7.8_bact_AACDW_400m_ANT_all	Bacteria	Proteobacteria	Alphaproteobacteria	SAR11 clade	Surface 1
AB-663_O08_Cp_6.4_bact_AACDW_400m_ANT_all	Bacteria	Proteobacteria	Alphaproteobacteria	SAR11 clade	Surface 1
AB-663_O11_Cp_7.9_bact_AACDW_400m_ANT_all	Bacteria	Proteobacteria	Alphaproteobacteria	SAR11 clade	Surface 1
AB-663_O23_Cp_6.4_bact_AACDW_400m_ANT_all	Bacteria	Proteobacteria	Alphaproteobacteria	SAR11 clade	Surface 1
AB-679_M13_Cp_7.2_bact_ESPIW_600m_CHI_all	Bacteria	Proteobacteria	Alphaproteobacteria	SAR11 clade	Surface 1
AC-312_G09_Cp_7.3_bact_PSAIW_1000m_P26_all	Bacteria	Proteobacteria	Alphaproteobacteria	SAR11 clade	Surface 1
AC-312_L08_Cp_6.2_bact_PSAIW_1000m_P26_all	Bacteria	Proteobacteria	Alphaproteobacteria	SAR11 clade	Surface 1
AC-407_C15_Cp_7.0_bact_AABW_1202m_OGA_all	Bacteria	Proteobacteria	Alphaproteobacteria	SAR11 clade	Surface 1
AC-407_K19_Cp_6.4_bact_AABW_1202m_OGA_all	Bacteria	Proteobacteria	Alphaproteobacteria	SAR11 clade	Surface 1
AC-409_O02_Cp_6.6_bact_AAIW_750m_OGA_all	Bacteria	Proteobacteria	Alphaproteobacteria	SAR11 clade	Surface 1
AB-633_B13_Cp_8.2_bact_NADW_2750m_NA_all	Bacteria	Proteobacteria	Gammaproteobacteria	E01-9C-26 marine group
AB-633_N16_Cp_8.7_bact_NADW_2750m_NA_all	Bacteria	Proteobacteria	Gammaproteobacteria	E01-9C-26 marine group
AB-663_J18_Cp_12.5_bact_AACDW_400m_ANT_all	Bacteria	Proteobacteria	Gammaproteobacteria	E01-9C-26 marine group
AB-663_M06_Cp_11.2_bact_AACDW_400m_ANT_all	Bacteria	Proteobacteria	Gammaproteobacteria	E01-9C-26 marine group
AB-663_P10_Cp_9.6_bact_AACDW_400m_ANT_all	Bacteria	Proteobacteria	Gammaproteobacteria	E01-9C-26 marine group
AB-679_I19_Cp_13.3_bact_ESPIW_600m_CHI_all	Bacteria	Proteobacteria	Gammaproteobacteria	E01-9C-26 marine group
AC-312_C17_Cp_7.2_bact_PSAIW_1000m_P26_all	Bacteria	Proteobacteria	Gammaproteobacteria	E01-9C-26 marine group
AC-337_C14_Cp_9.8_bact_CDW_3000m_P26_all	Bacteria	Proteobacteria	Gammaproteobacteria	E01-9C-26 marine group
AC-337_K15_Cp_7.5_bact_CDW_3000m_P26_all	Bacteria	Proteobacteria	Gammaproteobacteria	E01-9C-26 marine group
AC-407_F15_Cp_7.8_bact_AABW_1202m_OGA_all	Bacteria	Proteobacteria	Gammaproteobacteria	E01-9C-26 marine group
AC-407_P02_Cp_9.0_bact_AABW_1202m_OGA_all	Bacteria	Proteobacteria	Gammaproteobacteria	E01-9C-26 marine group
AC-409_D10_Cp_8.7_bact_AAIW_750m_OGA_all	Bacteria	Proteobacteria	Gammaproteobacteria	E01-9C-26 marine group
AC-409_P08_Cp_8.3_bact_AAIW_750m_OGA_all	Bacteria	Proteobacteria	Gammaproteobacteria	E01-9C-26 marine group
AB-637_M13_Cp_8.9_bact_AABW_5000m_NA_all	Bacteria	Proteobacteria	Gammaproteobacteria	KI89A clade
AC-312_L04_Cp_9.6_bact_PSAIW_1000m_P26_all	Bacteria	Proteobacteria	Gammaproteobacteria	KI89A clade
AC-407_D22_Cp_9.7_bact_AABW_1202m_OGA_all	Bacteria	Proteobacteria	Gammaproteobacteria	KI89A clade
AB-663_D15_Cp_6.4_bact_AACDW_400m_ANT_all	Bacteria	Proteobacteria	Gammaproteobacteria	Salinisphaerales	Salinisphaeraceae	ZD0417 marine group
AB-663_E14_Cp_7.8_bact_AACDW_400m_ANT_all	Bacteria	Proteobacteria	Gammaproteobacteria	Salinisphaerales	Salinisphaeraceae	ZD0417 marine group
AB-663_P08_Cp_6.6_bact_AACDW_400m_ANT_all	Bacteria	Proteobacteria	Gammaproteobacteria	Salinisphaerales	Salinisphaeraceae	ZD0417 marine group
AC-312_G03_Cp_9.8_bact_PSAIW_1000m_P26_all	Bacteria	Proteobacteria	Gammaproteobacteria	Salinisphaerales	Salinisphaeraceae	ZD0417 marine group
AC-312_N18_Cp_9.4_bact_PSAIW_1000m_P26_all	Bacteria	Proteobacteria	Gammaproteobacteria	Salinisphaerales	Salinisphaeraceae	ZD0417 marine group
AC-337_M13_Cp_7.1_bact_CDW_3000m_P26_all	Bacteria	Proteobacteria	Gammaproteobacteria	Salinisphaerales	Salinisphaeraceae	ZD0417 marine group
AC-337_P08_Cp_8.6_bact_CDW_3000m_P26_all	Bacteria	Proteobacteria	Gammaproteobacteria	Salinisphaerales	Salinisphaeraceae	ZD0417 marine group
AC-407_N14_Cp_7.0_bact_AABW_1202m_OGA_all	Bacteria	Proteobacteria	Gammaproteobacteria	Salinisphaerales	Salinisphaeraceae	ZD0417 marine group
AB-663_J06_Cp_8.3_bact_AACDW_400m_ANT_all	Bacteria	Proteobacteria	Gammaproteobacteria	Pseudomonadales	Moraxellaceae	Psychrobacter
AB-633_O03_Cp_7.0_bact_NADW_2750m_NA_all	Bacteria	Proteobacteria	Gammaproteobacteria	Alteromonadales	Colwelliaceae	Unknown Colwelliaceae genus
AB-633_F07_Cp_9.5_bact_NADW_2750m_NA_all	Bacteria	Proteobacteria	Gammaproteobacteria	Alteromonadales	Pseudoalteromonadaceae	Pseudoalteromonas
AB-633_K11_Cp_8.9_bact_NADW_2750m_NA_all	Bacteria	Proteobacteria	Gammaproteobacteria	Alteromonadales	Pseudoalteromonadaceae	Pseudoalteromonas
AB-679_C08_Cp_12.2_bact_ESPIW_600m_CHI_all	Bacteria	Proteobacteria	Gammaproteobacteria	Alteromonadales	Pseudoalteromonadaceae	Pseudoalteromonas
AB-679_G10_Cp_8.7_bact_ESPIW_600m_CHI_all	Bacteria	Proteobacteria	Gammaproteobacteria	Alteromonadales	Pseudoalteromonadaceae	Pseudoalteromonas
AB-679_O05_Cp_8.6_bact_ESPIW_600m_CHI_all	Bacteria	Proteobacteria	Gammaproteobacteria	Alteromonadales	Pseudoalteromonadaceae	Pseudoalteromonas
AB-633_L08_Cp_12.6_bact_NADW_2750m_NA_all	Bacteria	Proteobacteria	Gammaproteobacteria	Alteromonadales	Alteromonadaceae
AB-633_F21_Cp_13.0_bact_NADW_2750m_NA_all	Bacteria	Proteobacteria	Gammaproteobacteria	Alteromonadales	Alteromonadaceae	Marinobacter
AB-663_O09_Cp_8.2_bact_AACDW_400m_ANT_all	Bacteria	Proteobacteria	Gammaproteobacteria	Alteromonadales	Alteromonadaceae	SAR92 clade
AB-663_I05_Cp_7.9_bact_AACDW_400m_ANT_all	Bacteria	Proteobacteria	Gammaproteobacteria	Alteromonadales	Shewanellaceae	Shewanella
AB-663_C02_Cp_7.1_bact_AACDW_400m_ANT_all	Bacteria	Proteobacteria	Gammaproteobacteria	Oceanospirillales
AB-663_D05_Cp_6.1_bact_AACDW_400m_ANT_all	Bacteria	Proteobacteria	Gammaproteobacteria	Oceanospirillales
AB-663_F05_Cp_7.4_bact_AACDW_400m_ANT_all	Bacteria	Proteobacteria	Gammaproteobacteria	Oceanospirillales
AB-679_K02_Cp_6.7_bact_ESPIW_600m_CHI_all	Bacteria	Proteobacteria	Gammaproteobacteria	Oceanospirillales
AC-312_C09_Cp_7.7_bact_PSAIW_1000m_P26_all	Bacteria	Proteobacteria	Gammaproteobacteria	Oceanospirillales
AC-312_J11_Cp_7.1_bact_PSAIW_1000m_P26_all	Bacteria	Proteobacteria	Gammaproteobacteria	Oceanospirillales
AC-337_C04_Cp_7.8_bact_CDW_3000m_P26_all	Bacteria	Proteobacteria	Gammaproteobacteria	Oceanospirillales
AC-407_G19_Cp_5.6_bact_AABW_1202m_OGA_all	Bacteria	Proteobacteria	Gammaproteobacteria	Oceanospirillales
AB-679_K20_Cp_8.2_bact_ESPIW_600m_CHI_all	Bacteria	Proteobacteria	Gammaproteobacteria	Oceanospirillales	Oleiphilaceae	Oleiphilus
AB-663_C13_Cp_6.7_bact_AACDW_400m_ANT_all	Bacteria	Proteobacteria	Gammaproteobacteria	Oceanospirillales	ZD0405
AB-663_K02_Cp_7.0_bact_AACDW_400m_ANT_all	Bacteria	Proteobacteria	Gammaproteobacteria	Oceanospirillales	ZD0405
AB-663_O22_Cp_7.2_bact_AACDW_400m_ANT_all	Bacteria	Proteobacteria	Gammaproteobacteria	Oceanospirillales	ZD0405
AC-312_A16_Cp_10.1_bact_PSAIW_1000m_P26_all	Bacteria	Proteobacteria	Gammaproteobacteria	Oceanospirillales	ZD0405
AC-312_B22_Cp_7.5_bact_PSAIW_1000m_P26_all	Bacteria	Proteobacteria	Gammaproteobacteria	Oceanospirillales	ZD0405
AC-312_G02_Cp_7.7_bact_PSAIW_1000m_P26_all	Bacteria	Proteobacteria	Gammaproteobacteria	Oceanospirillales	ZD0405
AC-312_J23_Cp_6.8_bact_PSAIW_1000m_P26_all	Bacteria	Proteobacteria	Gammaproteobacteria	Oceanospirillales	ZD0405
AC-312_L19_Cp_7.1_bact_PSAIW_1000m_P26_all	Bacteria	Proteobacteria	Gammaproteobacteria	Oceanospirillales	ZD0405
AC-407_M14_Cp_5.8_bact_AABW_1202m_OGA_all	Bacteria	Proteobacteria	Gammaproteobacteria	Oceanospirillales	ZD0405
AC-409_I21_Cp_5.1_bact_AAIW_750m_OGA_all	Bacteria	Proteobacteria	Gammaproteobacteria	Oceanospirillales	ZD0405
AC-409_M02_Cp_7.7_bact_AAIW_750m_OGA_all	Bacteria	Proteobacteria	Gammaproteobacteria	Oceanospirillales	ZD0405
AB-663_L22_Cp_10.2_bact_AACDW_400m_ANT_all	Bacteria	Proteobacteria	Gammaproteobacteria	Oceanospirillales	OM182 clade
AC-409_O11_Cp_9.7_bact_AAIW_750m_OGA_all	Bacteria	Proteobacteria	Gammaproteobacteria	Oceanospirillales	OM182 clade
AB-637_D07_Cp_9.1_bact_AABW_5000m_NA_all	Bacteria	Proteobacteria	Gammaproteobacteria	Oceanospirillales	Oceanospirillaceae	Pseudospirillum
AB-679_A10_Cp_10.6_bact_ESPIW_600m_CHI_all	Bacteria	Proteobacteria	Gammaproteobacteria	Oceanospirillales	Oceanospirillaceae	Pseudospirillum
AB-679_K17_Cp_10.5_bact_ESPIW_600m_CHI_all	Bacteria	Proteobacteria	Gammaproteobacteria	Oceanospirillales	Oceanospirillaceae	Pseudospirillum
AB-637_B05_Cp_5.7_bact_AABW_5000m_NA_all	Bacteria	Proteobacteria	Gammaproteobacteria	Oceanospirillales	SAR86 clade
AB-663_B17_Cp_5.5_bact_AACDW_400m_ANT_all	Bacteria	Proteobacteria	Gammaproteobacteria	Oceanospirillales	SAR86 clade
AB-663_J22_Cp_6.5_bact_AACDW_400m_ANT_all	Bacteria	Proteobacteria	Gammaproteobacteria	Oceanospirillales	SAR86 clade
AB-663_K08_Cp_7.3_bact_AACDW_400m_ANT_all	Bacteria	Proteobacteria	Gammaproteobacteria	Oceanospirillales	SAR86 clade
AB-663_K14_Cp_6.3_bact_AACDW_400m_ANT_all	Bacteria	Proteobacteria	Gammaproteobacteria	Oceanospirillales	SAR86 clade
AB-663_P09_Cp_6.3_bact_AACDW_400m_ANT_all	Bacteria	Proteobacteria	Gammaproteobacteria	Oceanospirillales	SAR86 clade
AB-679_D23_Cp_4.6_bact_ESPIW_600m_CHI_all	Bacteria	Proteobacteria	Gammaproteobacteria	Oceanospirillales	SAR86 clade
AC-312_G17_Cp_5.8_bact_PSAIW_1000m_P26_all	Bacteria	Proteobacteria	Gammaproteobacteria	Oceanospirillales	SAR86 clade
AB-633_F23_Cp_7.5_bact_NADW_2750m_NA_all	Bacteria	Proteobacteria	Gammaproteobacteria	Xanthomonadales	Sinobacteraceae
AC-407_K10_Cp_12.4_bact_AABW_1202m_OGA_all	Bacteria	Proteobacteria	Gammaproteobacteria	Xanthomonadales	Sinobacteraceae
AC-407_M06_Cp_9.8_bact_AABW_1202m_OGA_all	Bacteria	Proteobacteria	Gammaproteobacteria	Xanthomonadales	Sinobacteraceae
AC-409_N02_Cp_8.2_bact_AAIW_750m_OGA_all	Bacteria	Proteobacteria	Gammaproteobacteria	Xanthomonadales	Sinobacteraceae
AC-647_F04_Cp_8.7_bact_AAIW_505m_OGA_all	Bacteria	PAUC34f
AC-647_F05_Cp_6.7_bact_AAIW_505m_OGA_all	Bacteria	PAUC34f
AC-647_K06_Cp_10.3_bact_AAIW_505m_OGA_all	Bacteria	PAUC34f
AC-647_L07_Cp_6.9_bact_AAIW_505m_OGA_all	Bacteria	PAUC34f
AC-649_F05_Cp_7.8_bact_PSIW_303m_OGA_all	Bacteria	PAUC34f
AC-649_L04_Cp_10.1_bact_PSIW_303m_OGA_all	Bacteria	PAUC34f
AC-665_F17_Cp_9.7_bact_AABW_2015m_OGA_all	Bacteria	PAUC34f
AC-724_C03_Cp_9.6_bact_MDW_3000m_MED_HNA	Bacteria	PAUC34f
AC-724_C21_Cp_11.0_bact_MDW_3000m_MED_HNA	Bacteria	PAUC34f
AC-647_C19_Cp_10.3_bact_AAIW_505m_OGA_all	Bacteria	Gemmatimonadetes	Gemmatimonadetes (class)	BD2-11 terrestrial group
AC-649_O08_Cp_10.4_bact_PSIW_303m_OGA_all	Bacteria	Gemmatimonadetes	Gemmatimonadetes (class)	BD2-11 terrestrial group
AC-665_E05_Cp_10.7_bact_AABW_2015m_OGA_all	Bacteria	Gemmatimonadetes	Gemmatimonadetes (class)	BD2-11 terrestrial group
AC-728_I21_Cp_11.6_bact_MDW_3000m_MED_LNA	Bacteria	Gemmatimonadetes	Gemmatimonadetes (class)	BD2-11 terrestrial group
AC-649_K23_Cp_12.6_bact_PSIW_303m_OGA_all	Bacteria	Spirochaetes	Spirochaetes (class)	Unknown Spirochaetes (class) order
AC-724_F15_Cp_12.5_bact_MDW_3000m_MED_HNA	Bacteria	Lentisphaerae	Lentisphaeria	WCHB1-41
AC-728_G23_Cp_8.0_bact_MDW_3000m_MED_LNA	Bacteria	Nitrospirae	Nitrospira	Nitrospirales	Nitrospiraceae	Unknown Nitrospiraceae genus
AC-728_O15_Cp_9.0_bact_MDW_3000m_MED_LNA	Bacteria	Nitrospirae	Nitrospira	Nitrospirales	Nitrospiraceae	Unknown Nitrospiraceae genus
AC-732_L14_Cp_7.2_bact_MDW_3500m_MED_HNA	Bacteria	Nitrospirae	Nitrospira	Nitrospirales	Nitrospiraceae	Unknown Nitrospiraceae genus
AC-732_I10_Cp_9.6_bact_MDW_3500m_MED_HNA	Bacteria	Deinococcus-Thermus	Deinococci	Deinococcales	Unknown Deinococcales family
AC-647_G15_Cp_6.5_bact_AAIW_505m_OGA_all	Bacteria	SAR406 clade(Marine group A)
AC-647_K10_Cp_7.2_bact_AAIW_505m_OGA_all	Bacteria	SAR406 clade(Marine group A)
AC-647_M11_Cp_6.9_bact_AAIW_505m_OGA_all	Bacteria	SAR406 clade(Marine group A)
AC-649_J07_Cp_7.0_bact_PSIW_303m_OGA_all	Bacteria	SAR406 clade(Marine group A)
AC-649_M06_Cp_8.0_bact_PSIW_303m_OGA_all	Bacteria	SAR406 clade(Marine group A)
AC-649_N02_Cp_6.5_bact_PSIW_303m_OGA_all	Bacteria	SAR406 clade(Marine group A)
AC-657_K14_Cp_11.6_bact_AABW_9696m_OGA_all	Bacteria	SAR406 clade(Marine group A)
AC-657_P11_Cp_6.9_bact_AABW_9696m_OGA_all	Bacteria	SAR406 clade(Marine group A)
AC-661_D17_Cp_5.8_bact_AABW_5010m_OGA_all	Bacteria	SAR406 clade(Marine group A)
AC-724_I20_Cp_7.0_bact_MDW_3000m_MED_HNA	Bacteria	SAR406 clade(Marine group A)
AC-647_I02_Cp_8.4_bact_AAIW_505m_OGA_all	Bacteria	Verrucomicrobia	Arctic97B-4 marine group
AC-649_B16_Cp_9.7_bact_PSIW_303m_OGA_all	Bacteria	Verrucomicrobia	Arctic97B-4 marine group
AC-657_C08_Cp_8.6_bact_AABW_9696m_OGA_all	Bacteria	Verrucomicrobia	Arctic97B-4 marine group
AC-661_D11_Cp_10.4_bact_AABW_5010m_OGA_all	Bacteria	Verrucomicrobia	Arctic97B-4 marine group
AC-661_N10_Cp_7.4_bact_AABW_5010m_OGA_all	Bacteria	Verrucomicrobia	Arctic97B-4 marine group
AC-661_N14_Cp_11.6_bact_AABW_5010m_OGA_all	Bacteria	Verrucomicrobia	Arctic97B-4 marine group
AC-661_P17_Cp_7.3_bact_AABW_5010m_OGA_all	Bacteria	Verrucomicrobia	Arctic97B-4 marine group
AC-665_G22_Cp_8.0_bact_AABW_2015m_OGA_all	Bacteria	Verrucomicrobia	Arctic97B-4 marine group
AC-665_N19_Cp_9.1_bact_AABW_2015m_OGA_all	Bacteria	Verrucomicrobia	Arctic97B-4 marine group
AC-724_O14_Cp_11.5_bact_MDW_3000m_MED_HNA	Bacteria	Verrucomicrobia	Arctic97B-4 marine group
AC-724_E13_Cp_11.8_bact_MDW_3000m_MED_HNA	Bacteria	Verrucomicrobia	Opitutae
AC-724_E18_Cp_10.7_bact_MDW_3000m_MED_HNA	Bacteria	Verrucomicrobia	Opitutae
AC-724_C06_Cp_7.8_bact_MDW_3000m_MED_HNA	Bacteria	Verrucomicrobia	Opitutae	Puniceicoccales	Puniceicoccaceae	Cerasicoccus
AC-724_C23_Cp_7.8_bact_MDW_3000m_MED_HNA	Bacteria	Verrucomicrobia	Opitutae	Puniceicoccales	Puniceicoccaceae	Cerasicoccus
AC-649_D19_Cp_9.8_bact_PSIW_303m_OGA_all	Bacteria	Verrucomicrobia	Opitutae	Puniceicoccales	Puniceicoccaceae	Unknown Puniceicoccaceae genus
AC-657_F15_Cp_7.4_bact_AABW_9696m_OGA_all	Bacteria	Bacteroidetes	Flavobacteria	Flavobacteriales	NS9 marine group
AC-657_F18_Cp_5.8_bact_AABW_9696m_OGA_all	Bacteria	Bacteroidetes	Flavobacteria	Flavobacteriales	NS9 marine group
AC-657_A11_Cp_7.7_bact_AABW_9696m_OGA_all	Bacteria	Bacteroidetes	Flavobacteria	Flavobacteriales	Flavobacteriaceae
AC-657_D23_Cp_7.2_bact_AABW_9696m_OGA_all	Bacteria	Bacteroidetes	Flavobacteria	Flavobacteriales	Flavobacteriaceae
AC-657_L21_Cp_6.0_bact_AABW_9696m_OGA_all	Bacteria	Bacteroidetes	Flavobacteria	Flavobacteriales	Flavobacteriaceae
AC-661_A19_Cp_7.4_bact_AABW_5010m_OGA_all	Bacteria	Bacteroidetes	Flavobacteria	Flavobacteriales	Flavobacteriaceae
AC-661_E09_Cp_8.9_bact_AABW_5010m_OGA_all	Bacteria	Bacteroidetes	Flavobacteria	Flavobacteriales	Flavobacteriaceae
AC-661_F09_Cp_5.7_bact_AABW_5010m_OGA_all	Bacteria	Bacteroidetes	Flavobacteria	Flavobacteriales	Flavobacteriaceae
AC-661_G14_Cp_5.4_bact_AABW_5010m_OGA_all	Bacteria	Bacteroidetes	Flavobacteria	Flavobacteriales	Flavobacteriaceae
AC-661_I21_Cp_4.5_bact_AABW_5010m_OGA_all	Bacteria	Bacteroidetes	Flavobacteria	Flavobacteriales	Flavobacteriaceae
AC-661_O08_Cp_5.3_bact_AABW_5010m_OGA_all	Bacteria	Bacteroidetes	Flavobacteria	Flavobacteriales	Flavobacteriaceae
AC-724_E07_Cp_5.4_bact_MDW_3000m_MED_HNA	Bacteria	Bacteroidetes	Flavobacteria	Flavobacteriales	Flavobacteriaceae	Zunongwangia
AC-732_A16_Cp_6.6_bact_MDW_3500m_MED_HNA	Bacteria	Bacteroidetes	Flavobacteria	Flavobacteriales	Flavobacteriaceae	Zunongwangia
AC-724_I06_Cp_5.7_bact_MDW_3000m_MED_HNA	Bacteria	Bacteroidetes	Flavobacteria	Flavobacteriales	Flavobacteriaceae	Mesonia
AC-724_P02_Cp_5.9_bact_MDW_3000m_MED_HNA	Bacteria	Bacteroidetes	Flavobacteria	Flavobacteriales	Flavobacteriaceae	Gramella
AC-732_B10_Cp_8.6_bact_MDW_3500m_MED_HNA	Bacteria	Bacteroidetes	Flavobacteria	Flavobacteriales	Flavobacteriaceae	Gramella
AC-724_F11_Cp_5.8_bact_MDW_3000m_MED_HNA	Bacteria	Bacteroidetes	Flavobacteria	Flavobacteriales	Flavobacteriaceae	Muricauda	Muricauda lutimaris
AC-724_A08_Cp_9.3_bact_MDW_3000m_MED_HNA	Bacteria	Bacteroidetes	Flavobacteria	Flavobacteriales	Flavobacteriaceae	Leeuwenhoekiella
AC-724_E10_Cp_6.7_bact_MDW_3000m_MED_HNA	Bacteria	Bacteroidetes	Flavobacteria	Flavobacteriales	Flavobacteriaceae	Leeuwenhoekiella
AC-724_K08_Cp_8.7_bact_MDW_3000m_MED_HNA	Bacteria	Bacteroidetes	Flavobacteria	Flavobacteriales	Flavobacteriaceae	Leeuwenhoekiella
AC-724_M20_Cp_8.0_bact_MDW_3000m_MED_HNA	Bacteria	Bacteroidetes	Flavobacteria	Flavobacteriales	Flavobacteriaceae	Leeuwenhoekiella
AC-724_M21_Cp_7.5_bact_MDW_3000m_MED_HNA	Bacteria	Bacteroidetes	Flavobacteria	Flavobacteriales	Flavobacteriaceae	Leeuwenhoekiella
AC-732_B15_Cp_10.6_bact_MDW_3500m_MED_HNA	Bacteria	Bacteroidetes	Flavobacteria	Flavobacteriales	Flavobacteriaceae	Leeuwenhoekiella
AC-732_F07_Cp_9.1_bact_MDW_3500m_MED_HNA	Bacteria	Bacteroidetes	Flavobacteria	Flavobacteriales	Flavobacteriaceae	Leeuwenhoekiella
AC-738_F23_Cp_7.8_bact_MIW_600m_MED_HNA	Bacteria	Bacteroidetes	Flavobacteria	Flavobacteriales	Flavobacteriaceae	Leeuwenhoekiella
AC-661_K05_Cp_7.2_bact_AABW_5010m_OGA_all	Bacteria	Bacteroidetes	Flavobacteria	Flavobacteriales	Flavobacteriaceae	Polaribacter
AC-661_K15_Cp_7.7_bact_AABW_5010m_OGA_all	Bacteria	Bacteroidetes	Flavobacteria	Flavobacteriales	Flavobacteriaceae	Polaribacter
AC-661_M08_Cp_8.8_bact_AABW_5010m_OGA_all	Bacteria	Bacteroidetes	Flavobacteria	Flavobacteriales	Flavobacteriaceae	Polaribacter
AC-724_N23_Cp_7.9_bact_MDW_3000m_MED_HNA	Bacteria	Bacteroidetes	Flavobacteria	Flavobacteriales	Flavobacteriaceae	Unknown Flavobacteriaceae genus
AC-647_J08_Cp_5.5_bact_AAIW_505m_OGA_all	Bacteria	Bacteroidetes	Flavobacteria	Flavobacteriales	Unknown Flavobacteriales family
AC-661_M14_Cp_6.5_bact_AABW_5010m_OGA_all	Bacteria	Bacteroidetes	Flavobacteria	Flavobacteriales	Unknown Flavobacteriales family
AC-649_F23_Cp_9.1_bact_PSIW_303m_OGA_all	Bacteria	Chloroflexi	Ktedonobacteria	JG30-KF-CM66
AC-647_L22_Cp_6.9_bact_AAIW_505m_OGA_all	Bacteria	Chloroflexi	Chloroflexi Subdivision 8 - TK10
AC-649_M21_Cp_7.3_bact_PSIW_303m_OGA_all	Bacteria	Chloroflexi	Chloroflexi Subdivision 8 - TK10
AC-665_K08_Cp_8.6_bact_AABW_2015m_OGA_all	Bacteria	Chloroflexi	Chloroflexi Subdivision 8 - TK10
AC-738_C15_Cp_10.9_bact_MIW_600m_MED_HNA	Bacteria	Chloroflexi	Chloroflexi Subdivision 8 - TK10
AC-661_E14_Cp_7.0_bact_AABW_5010m_OGA_all	Bacteria	Chloroflexi	Chloroflexi Subdivision 6	FS118-62B-02
AC-661_C20_Cp_7.3_bact_AABW_5010m_OGA_all	Bacteria	Chloroflexi	Chloroflexi Subdivision 6	vadinBA26
AC-647_D04_Cp_5.3_bact_AAIW_505m_OGA_all	Bacteria	Chloroflexi	Anaerolineae
AC-738_G16_Cp_9.5_bact_MIW_600m_MED_HNA	Bacteria	Chloroflexi	Anaerolineae
AC-647_B08_Cp_9.2_bact_AAIW_505m_OGA_all	Bacteria	Chloroflexi	Chloroflexi Subdivision 5 - SAR202 clade
AC-647_C07_Cp_5.3_bact_AAIW_505m_OGA_all	Bacteria	Chloroflexi	Chloroflexi Subdivision 5 - SAR202 clade
AC-647_C17_Cp_9.4_bact_AAIW_505m_OGA_all	Bacteria	Chloroflexi	Chloroflexi Subdivision 5 - SAR202 clade
AC-647_G23_Cp_5.8_bact_AAIW_505m_OGA_all	Bacteria	Chloroflexi	Chloroflexi Subdivision 5 - SAR202 clade
AC-647_N09_Cp_8.4_bact_AAIW_505m_OGA_all	Bacteria	Chloroflexi	Chloroflexi Subdivision 5 - SAR202 clade
AC-647_P02_Cp_5.6_bact_AAIW_505m_OGA_all	Bacteria	Chloroflexi	Chloroflexi Subdivision 5 - SAR202 clade
AC-649_A13_Cp_6.9_bact_PSIW_303m_OGA_all	Bacteria	Chloroflexi	Chloroflexi Subdivision 5 - SAR202 clade
AC-649_A22_Cp_10.2_bact_PSIW_303m_OGA_all	Bacteria	Chloroflexi	Chloroflexi Subdivision 5 - SAR202 clade
AC-649_G13_Cp_9.9_bact_PSIW_303m_OGA_all	Bacteria	Chloroflexi	Chloroflexi Subdivision 5 - SAR202 clade
AC-661_B13_Cp_10.1_bact_AABW_5010m_OGA_all	Bacteria	Chloroflexi	Chloroflexi Subdivision 5 - SAR202 clade
AC-661_G15_Cp_11.4_bact_AABW_5010m_OGA_all	Bacteria	Chloroflexi	Chloroflexi Subdivision 5 - SAR202 clade
AC-724_C02_Cp_13.9_bact_MDW_3000m_MED_HNA	Bacteria	Chloroflexi	Chloroflexi Subdivision 5 - SAR202 clade
AC-724_D14_Cp_13.4_bact_MDW_3000m_MED_HNA	Bacteria	Chloroflexi	Chloroflexi Subdivision 5 - SAR202 clade
AC-724_K15_Cp_12.4_bact_MDW_3000m_MED_HNA	Bacteria	Chloroflexi	Chloroflexi Subdivision 5 - SAR202 clade
AC-724_O22_Cp_11.3_bact_MDW_3000m_MED_HNA	Bacteria	Chloroflexi	Chloroflexi Subdivision 5 - SAR202 clade
AC-665_B06_Cp_11.5_bact_AABW_2015m_OGA_all	Bacteria	Planctomycetes	Pla3 lineage
AC-657_K11_Cp_11.1_bact_AABW_9696m_OGA_all	Bacteria	Planctomycetes	Phycisphaerae	Phycisphaerales	Phycisphaeraceae
AC-657_L07_Cp_12.5_bact_AABW_9696m_OGA_all	Bacteria	Planctomycetes	Phycisphaerae	Phycisphaerales	Phycisphaeraceae
AC-657_N18_Cp_12.4_bact_AABW_9696m_OGA_all	Bacteria	Planctomycetes	Phycisphaerae	Phycisphaerales	Phycisphaeraceae
AC-665_K02_Cp_9.2_bact_AABW_2015m_OGA_all	Bacteria	Planctomycetes	Phycisphaerae	Phycisphaerales	Unknown Phycisphaerales family
AC-647_C15_Cp_10.0_bact_AAIW_505m_OGA_all	Bacteria	Planctomycetes	Planctomycetacia	Planctomycetales	Planctomycetaceae	Blastopirellula
AC-647_O11_Cp_11.1_bact_AAIW_505m_OGA_all	Bacteria	Planctomycetes	Planctomycetacia	Planctomycetales	Planctomycetaceae	Unknown Planctomycetaceae genus
AC-665_C13_Cp_9.7_bact_AABW_2015m_OGA_all	Bacteria	Planctomycetes	Planctomycetacia	Planctomycetales	Planctomycetaceae	Unknown Planctomycetaceae genus
AC-649_C16_Cp_10.0_bact_PSIW_303m_OGA_all	Bacteria	Planctomycetes	Planctomycetacia	Planctomycetales	Unknown Planctomycetales family
AC-661_A20_Cp_13.1_bact_AABW_5010m_OGA_all	Bacteria	Planctomycetes	Planctomycetacia	Planctomycetales	Unknown Planctomycetales family
AC-665_N13_Cp_13.6_bact_AABW_2015m_OGA_all	Bacteria	Planctomycetes	Planctomycetacia	Planctomycetales	Unknown Planctomycetales family
AC-665_O07_Cp_12.3_bact_AABW_2015m_OGA_all	Bacteria	Planctomycetes	Planctomycetacia	Planctomycetales	Unknown Planctomycetales family
AC-661_I23_Cp_12.0_bact_AABW_5010m_OGA_all	Bacteria	Planctomycetes	Planctomycetacia	Unknown Planctomycetacia order
AC-649_A06_Cp_13.6_bact_PSIW_303m_OGA_all	Bacteria	Acidobacteria	RB25	Acidobacteria group 26
AC-649_M23_Cp_7.8_bact_PSIW_303m_OGA_all	Bacteria	Acidobacteria	Acidobacteria (class)	Acidobacteria group 11
AC-738_E19_Cp_8.3_bact_MIW_600m_MED_HNA	Bacteria	Acidobacteria	Acidobacteria (class)	Acidobacteria group 11
AC-738_L23_Cp_7.7_bact_MIW_600m_MED_HNA	Bacteria	Acidobacteria	Acidobacteria (class)	Acidobacteria group 11
AC-649_O18_Cp_6.7_bact_PSIW_303m_OGA_all	Bacteria	Acidobacteria	Acidobacteria (class)	Acidobacteria group 9 - BPC015
AC-665_F06_Cp_6.8_bact_AABW_2015m_OGA_all	Bacteria	Acidobacteria	Acidobacteria (class)	Acidobacteria group 21 (BPC102)
AC-665_I20_Cp_10.9_bact_AABW_2015m_OGA_all	Bacteria	Acidobacteria	Acidobacteria (class)	Acidobacteria group 21 (BPC102)
AC-665_K03_Cp_11.5_bact_AABW_2015m_OGA_all	Bacteria	Acidobacteria	Acidobacteria (class)	Acidobacteria group 21 (BPC102)
AC-724_N18_Cp_6.1_bact_MDW_3000m_MED_HNA	Bacteria	Acidobacteria	Acidobacteria (class)	Acidobacteria group 21 (BPC102)
AC-738_I23_Cp_7.8_bact_MIW_600m_MED_HNA	Bacteria	Acidobacteria	Acidobacteria (class)	Acidobacteria group 21 (BPC102)
AC-647_B10_Cp_9.7_bact_AAIW_505m_OGA_all	Bacteria	Acidobacteria	Acidobacteria (class)	Acidobacteria group 6 (DA023)
AC-647_M23_Cp_8.2_bact_AAIW_505m_OGA_all	Bacteria	Acidobacteria	Acidobacteria (class)	Acidobacteria group 6 (DA023)
AC-649_F17_Cp_12.6_bact_PSIW_303m_OGA_all	Bacteria	Acidobacteria	Acidobacteria (class)	Acidobacteria group 6 (DA023)
AC-665_C20_Cp_8.3_bact_AABW_2015m_OGA_all	Bacteria	Acidobacteria	Acidobacteria (class)	Acidobacteria group 6 (DA023)
AC-665_D20_Cp_5.5_bact_AABW_2015m_OGA_all	Bacteria	Acidobacteria	Acidobacteria (class)	Acidobacteria group 6 (DA023)
AC-665_M03_Cp_12.3_bact_AABW_2015m_OGA_all	Bacteria	Acidobacteria	Acidobacteria (class)	Acidobacteria group 6 (DA023)
AC-665_M08_Cp_9.8_bact_AABW_2015m_OGA_all	Bacteria	Acidobacteria	Acidobacteria (class)	Acidobacteria group 6 (DA023)
AC-724_D03_Cp_13.7_bact_MDW_3000m_MED_HNA	Bacteria	Acidobacteria	Acidobacteria (class)	Acidobacteria group 6 (DA023)
AC-724_E03_Cp_9.8_bact_MDW_3000m_MED_HNA	Bacteria	Acidobacteria	Acidobacteria (class)	Acidobacteria group 6 (DA023)
AC-728_L18_Cp_13.7_bact_MDW_3000m_MED_LNA	Bacteria	Acidobacteria	Acidobacteria (class)	Acidobacteria group 6 (DA023)
AC-738_N21_Cp_11.1_bact_MIW_600m_MED_HNA	Bacteria	Acidobacteria	Acidobacteria (class)	Acidobacteria group 6 (DA023)
AC-649_A05_Cp_7.0_bact_PSIW_303m_OGA_all	Bacteria	Acidobacteria	Acidobacteria (class)	Acidobacteria group 3	PAUC26f
AC-724_D22_Cp_9.5_bact_MDW_3000m_MED_HNA	Bacteria	Acidobacteria	Acidobacteria (class)	Acidobacteria group 3	PAUC26f
AC-665_N23_Cp_7.5_bact_AABW_2015m_OGA_all	Bacteria	Acidobacteria	Acidobacteria (class)	Unknown Acidobacteria (class) order
AC-724_D21_Cp_8.3_bact_MDW_3000m_MED_HNA	Bacteria	Acidobacteria	Acidobacteria (class)	Unknown Acidobacteria (class) order
AC-724_E20_Cp_8.8_bact_MDW_3000m_MED_HNA	Bacteria	Acidobacteria	Acidobacteria (class)	Unknown Acidobacteria (class) order
AC-724_I08_Cp_9.4_bact_MDW_3000m_MED_HNA	Bacteria	Acidobacteria	Acidobacteria (class)	Unknown Acidobacteria (class) order
AC-724_L03_Cp_6.8_bact_MDW_3000m_MED_HNA	Bacteria	Acidobacteria	Acidobacteria (class)	Unknown Acidobacteria (class) order
AC-732_B03_Cp_10.9_bact_MDW_3500m_MED_HNA	Bacteria	Acidobacteria	Acidobacteria (class)	Unknown Acidobacteria (class) order
AC-732_K20_Cp_10.9_bact_MDW_3500m_MED_HNA	Bacteria	Acidobacteria	Acidobacteria (class)	Unknown Acidobacteria (class) order
AC-738_J22_Cp_12.2_bact_MIW_600m_MED_HNA	Bacteria	Proteobacteria	SPOTSOCT00	5m83
AC-657_D04_Cp_8.4_bact_AABW_9696m_OGA_all	Bacteria	Proteobacteria	JTB23
AC-738_G22_Cp_7.5_bact_MIW_600m_MED_HNA	Bacteria	Proteobacteria	Deltaproteobacteria	Nitrospinaceae order incertae sedis	Nitrospinaceae	Candidatus Entotheonella
AC-738_L19_Cp_8.4_bact_MIW_600m_MED_HNA	Bacteria	Proteobacteria	Deltaproteobacteria	Nitrospinaceae order incertae sedis	Nitrospinaceae	Candidatus Entotheonella
AC-647_O10_Cp_5.6_bact_AAIW_505m_OGA_all	Bacteria	Proteobacteria	Deltaproteobacteria	Nitrospinaceae order incertae sedis	Nitrospinaceae	Nitrospina
AC-649_C23_Cp_7.0_bact_PSIW_303m_OGA_all	Bacteria	Proteobacteria	Deltaproteobacteria	Nitrospinaceae order incertae sedis	Nitrospinaceae	Nitrospina
AC-665_A13_Cp_5.4_bact_AABW_2015m_OGA_all	Bacteria	Proteobacteria	Deltaproteobacteria	Nitrospinaceae order incertae sedis	Nitrospinaceae	Nitrospina
AC-665_C06_Cp_6.0_bact_AABW_2015m_OGA_all	Bacteria	Proteobacteria	Deltaproteobacteria	Nitrospinaceae order incertae sedis	Nitrospinaceae	Nitrospina
AC-665_J20_Cp_6.1_bact_AABW_2015m_OGA_all	Bacteria	Proteobacteria	Deltaproteobacteria	Nitrospinaceae order incertae sedis	Nitrospinaceae	Nitrospina
AC-738_E11_Cp_8.3_bact_MIW_600m_MED_HNA	Bacteria	Proteobacteria	Deltaproteobacteria	Nitrospinaceae order incertae sedis	Nitrospinaceae	Nitrospina
AC-738_G07_Cp_7.0_bact_MIW_600m_MED_HNA	Bacteria	Proteobacteria	Deltaproteobacteria	Nitrospinaceae order incertae sedis	Nitrospinaceae	Nitrospina
AC-738_N20_Cp_6.4_bact_MIW_600m_MED_HNA	Bacteria	Proteobacteria	Deltaproteobacteria	Nitrospinaceae order incertae sedis	Nitrospinaceae	Nitrospina
AC-738_P20_Cp_6.4_bact_MIW_600m_MED_HNA	Bacteria	Proteobacteria	Deltaproteobacteria	Nitrospinaceae order incertae sedis	Nitrospinaceae	Nitrospina
AC-738_P18_Cp_8.5_bact_MIW_600m_MED_HNA	Bacteria	Proteobacteria	Deltaproteobacteria	Nitrospinaceae order incertae sedis	Unknown Nitrospinaceae order incertae sedis family
AC-738_E15_Cp_10.1_bact_MIW_600m_MED_HNA	Bacteria	Proteobacteria	Deltaproteobacteria	Desulfurellales	Desulfurellaceae
AC-738_N13_Cp_8.9_bact_MIW_600m_MED_HNA	Bacteria	Proteobacteria	Deltaproteobacteria	Desulfurellales	Desulfurellaceae
AC-665_C08_Cp_8.5_bact_AABW_2015m_OGA_all	Bacteria	Proteobacteria	Deltaproteobacteria	Desulfurellales	Unknown Desulfurellales family
AC-738_B07_Cp_11.8_bact_MIW_600m_MED_HNA	Bacteria	Proteobacteria	Deltaproteobacteria	Desulfurellales	Unknown Desulfurellales family
AC-738_D09_Cp_9.3_bact_MIW_600m_MED_HNA	Bacteria	Proteobacteria	Deltaproteobacteria	Sh765B-TzT-29
AC-647_A05_Cp_5.8_bact_AAIW_505m_OGA_all	Bacteria	Proteobacteria	Deltaproteobacteria	SAR324 clade(Marine group B)
AC-647_A07_Cp_5.8_bact_AAIW_505m_OGA_all	Bacteria	Proteobacteria	Deltaproteobacteria	SAR324 clade(Marine group B)
AC-647_A21_Cp_8.0_bact_AAIW_505m_OGA_all	Bacteria	Proteobacteria	Deltaproteobacteria	SAR324 clade(Marine group B)
AC-647_B05_Cp_8.3_bact_AAIW_505m_OGA_all	Bacteria	Proteobacteria	Deltaproteobacteria	SAR324 clade(Marine group B)
AC-647_F18_Cp_6.9_bact_AAIW_505m_OGA_all	Bacteria	Proteobacteria	Deltaproteobacteria	SAR324 clade(Marine group B)
AC-647_I05_Cp_7.3_bact_AAIW_505m_OGA_all	Bacteria	Proteobacteria	Deltaproteobacteria	SAR324 clade(Marine group B)
AC-647_I17_Cp_7.4_bact_AAIW_505m_OGA_all	Bacteria	Proteobacteria	Deltaproteobacteria	SAR324 clade(Marine group B)
AC-647_J05_Cp_8.8_bact_AAIW_505m_OGA_all	Bacteria	Proteobacteria	Deltaproteobacteria	SAR324 clade(Marine group B)
AC-647_L23_Cp_6.2_bact_AAIW_505m_OGA_all	Bacteria	Proteobacteria	Deltaproteobacteria	SAR324 clade(Marine group B)
AC-647_N02_Cp_6.2_bact_AAIW_505m_OGA_all	Bacteria	Proteobacteria	Deltaproteobacteria	SAR324 clade(Marine group B)
AC-647_N08_Cp_7.3_bact_AAIW_505m_OGA_all	Bacteria	Proteobacteria	Deltaproteobacteria	SAR324 clade(Marine group B)
AC-647_N11_Cp_7.0_bact_AAIW_505m_OGA_all	Bacteria	Proteobacteria	Deltaproteobacteria	SAR324 clade(Marine group B)
AC-647_N13_Cp_6.2_bact_AAIW_505m_OGA_all	Bacteria	Proteobacteria	Deltaproteobacteria	SAR324 clade(Marine group B)
AC-647_O17_Cp_6.1_bact_AAIW_505m_OGA_all	Bacteria	Proteobacteria	Deltaproteobacteria	SAR324 clade(Marine group B)
AC-647_P06_Cp_5.8_bact_AAIW_505m_OGA_all	Bacteria	Proteobacteria	Deltaproteobacteria	SAR324 clade(Marine group B)
AC-649_C14_Cp_6.7_bact_PSIW_303m_OGA_all	Bacteria	Proteobacteria	Deltaproteobacteria	SAR324 clade(Marine group B)
AC-649_D07_Cp_8.3_bact_PSIW_303m_OGA_all	Bacteria	Proteobacteria	Deltaproteobacteria	SAR324 clade(Marine group B)
AC-649_K08_Cp_8.6_bact_PSIW_303m_OGA_all	Bacteria	Proteobacteria	Deltaproteobacteria	SAR324 clade(Marine group B)
AC-649_L13_Cp_7.6_bact_PSIW_303m_OGA_all	Bacteria	Proteobacteria	Deltaproteobacteria	SAR324 clade(Marine group B)
AC-649_N07_Cp_6.4_bact_PSIW_303m_OGA_all	Bacteria	Proteobacteria	Deltaproteobacteria	SAR324 clade(Marine group B)
AC-649_O20_Cp_6.5_bact_PSIW_303m_OGA_all	Bacteria	Proteobacteria	Deltaproteobacteria	SAR324 clade(Marine group B)
AC-661_B06_Cp_5.5_bact_AABW_5010m_OGA_all	Bacteria	Proteobacteria	Deltaproteobacteria	SAR324 clade(Marine group B)
AC-661_C19_Cp_5.2_bact_AABW_5010m_OGA_all	Bacteria	Proteobacteria	Deltaproteobacteria	SAR324 clade(Marine group B)
AC-661_D02_Cp_7.4_bact_AABW_5010m_OGA_all	Bacteria	Proteobacteria	Deltaproteobacteria	SAR324 clade(Marine group B)
AC-661_E17_Cp_7.0_bact_AABW_5010m_OGA_all	Bacteria	Proteobacteria	Deltaproteobacteria	SAR324 clade(Marine group B)
AC-661_M17_Cp_7.0_bact_AABW_5010m_OGA_all	Bacteria	Proteobacteria	Deltaproteobacteria	SAR324 clade(Marine group B)
AC-665_I05_Cp_6.9_bact_AABW_2015m_OGA_all	Bacteria	Proteobacteria	Deltaproteobacteria	SAR324 clade(Marine group B)
AC-665_K10_Cp_4.8_bact_AABW_2015m_OGA_all	Bacteria	Proteobacteria	Deltaproteobacteria	SAR324 clade(Marine group B)
AC-665_K22_Cp_6.7_bact_AABW_2015m_OGA_all	Bacteria	Proteobacteria	Deltaproteobacteria	SAR324 clade(Marine group B)
AC-665_O22_Cp_5.3_bact_AABW_2015m_OGA_all	Bacteria	Proteobacteria	Deltaproteobacteria	SAR324 clade(Marine group B)
AC-724_C09_Cp_4.4_bact_MDW_3000m_MED_HNA	Bacteria	Proteobacteria	Deltaproteobacteria	SAR324 clade(Marine group B)
AC-724_K14_Cp_6.5_bact_MDW_3000m_MED_HNA	Bacteria	Proteobacteria	Deltaproteobacteria	SAR324 clade(Marine group B)
AC-724_N22_Cp_7.0_bact_MDW_3000m_MED_HNA	Bacteria	Proteobacteria	Deltaproteobacteria	SAR324 clade(Marine group B)
AC-738_K21_Cp_7.5_bact_MIW_600m_MED_HNA	Bacteria	Proteobacteria	Deltaproteobacteria	SAR324 clade(Marine group B)
AC-738_O11_Cp_8.4_bact_MIW_600m_MED_HNA	Bacteria	Proteobacteria	Deltaproteobacteria	SAR324 clade(Marine group B)
AC-800_D07_Cp_5.9_bact_NSDW_1750m_NA_all	Bacteria	Proteobacteria	Deltaproteobacteria	SAR324 clade(Marine group B)
AC-800_F08_Cp_7.0_bact_NSDW_1750m_NA_all	Bacteria	Proteobacteria	Deltaproteobacteria	SAR324 clade(Marine group B)
AD-101_E15_Cp_8.8_bact_LSW_1750m_NA_all	Bacteria	Proteobacteria	Deltaproteobacteria	SAR324 clade(Marine group B)
AC-724_N10_Cp_9.9_bact_MDW_3000m_MED_HNA	Bacteria	Proteobacteria	Deltaproteobacteria	Myxococcales	0319-6G20
AC-649_P14_Cp_7.8_bact_PSIW_303m_OGA_all	Bacteria	Proteobacteria	Deltaproteobacteria	Unknown Deltaproteobacteria order
AC-738_A19_Cp_7.4_bact_MIW_600m_MED_HNA	Bacteria	Proteobacteria	Deltaproteobacteria	Unknown Deltaproteobacteria order
AC-647_O21_Cp_6.2_bact_AAIW_505m_OGA_all	Bacteria	Proteobacteria	Alphaproteobacteria	MNG3
AC-649_E20_Cp_6.9_bact_PSIW_303m_OGA_all	Bacteria	Proteobacteria	Alphaproteobacteria	MNG3
AC-724_D04_Cp_8.0_bact_MDW_3000m_MED_HNA	Bacteria	Proteobacteria	Alphaproteobacteria	MNG3
AC-728_I18_Cp_12.4_bact_MDW_3000m_MED_LNA	Bacteria	Proteobacteria	Alphaproteobacteria	MNG3
AC-738_I14_Cp_9.2_bact_MIW_600m_MED_HNA	Bacteria	Proteobacteria	Alphaproteobacteria	MNG3
AC-738_I18_Cp_8.1_bact_MIW_600m_MED_HNA	Bacteria	Proteobacteria	Alphaproteobacteria	MNG3
AC-657_B14_Cp_11.0_bact_AABW_9696m_OGA_all	Bacteria	Proteobacteria	Alphaproteobacteria	Caulobacterales	Hyphomonadaceae	Hellea	Hyphomonadaceae bacterium GSW-24
AC-738_C13_Cp_11.9_bact_MIW_600m_MED_HNA	Bacteria	Proteobacteria	Alphaproteobacteria	DB1-14
AC-647_P14_Cp_4.7_bact_AAIW_505m_OGA_all	Bacteria	Proteobacteria	Alphaproteobacteria	OCS116 clade
AC-728_A19_Cp_9.1_bact_MDW_3000m_MED_LNA	Bacteria	Proteobacteria	Alphaproteobacteria	Rickettsiales	S25-593
AC-728_F17_Cp_7.7_bact_MDW_3000m_MED_LNA	Bacteria	Proteobacteria	Alphaproteobacteria	Rickettsiales	S25-593
AC-728_G16_Cp_7.6_bact_MDW_3000m_MED_LNA	Bacteria	Proteobacteria	Alphaproteobacteria	Rickettsiales	S25-593
AC-728_M08_Cp_6.2_bact_MDW_3000m_MED_LNA	Bacteria	Proteobacteria	Alphaproteobacteria	Rickettsiales	S25-593
AC-728_M19_Cp_7.8_bact_MDW_3000m_MED_LNA	Bacteria	Proteobacteria	Alphaproteobacteria	Rickettsiales	S25-593
AC-728_O21_Cp_7.4_bact_MDW_3000m_MED_LNA	Bacteria	Proteobacteria	Alphaproteobacteria	Rickettsiales	S25-593
AC-665_C11_Cp_11.3_bact_AABW_2015m_OGA_all	Bacteria	Proteobacteria	Alphaproteobacteria	Rickettsiales	SAR116 clade
AC-724_I10_Cp_13.0_bact_MDW_3000m_MED_HNA	Bacteria	Proteobacteria	Alphaproteobacteria	Rickettsiales	SAR116 clade
AC-661_A09_Cp_10.2_bact_AABW_5010m_OGA_all	Bacteria	Proteobacteria	Alphaproteobacteria	Rhodobacterales	Rhodobacteraceae
AC-661_A11_Cp_10.5_bact_AABW_5010m_OGA_all	Bacteria	Proteobacteria	Alphaproteobacteria	Rhodobacterales	Rhodobacteraceae
AC-661_F05_Cp_10.8_bact_AABW_5010m_OGA_all	Bacteria	Proteobacteria	Alphaproteobacteria	Rhodobacterales	Rhodobacteraceae
AC-661_F15_Cp_11.6_bact_AABW_5010m_OGA_all	Bacteria	Proteobacteria	Alphaproteobacteria	Rhodobacterales	Rhodobacteraceae
AC-661_J04_Cp_12.2_bact_AABW_5010m_OGA_all	Bacteria	Proteobacteria	Alphaproteobacteria	Rhodobacterales	Rhodobacteraceae
AC-661_J17_Cp_9.5_bact_AABW_5010m_OGA_all	Bacteria	Proteobacteria	Alphaproteobacteria	Rhodobacterales	Rhodobacteraceae
AC-661_O02_Cp_9.9_bact_AABW_5010m_OGA_all	Bacteria	Proteobacteria	Alphaproteobacteria	Rhodobacterales	Rhodobacteraceae
AC-647_C16_Cp_7.7_bact_AAIW_505m_OGA_all	Bacteria	Proteobacteria	Alphaproteobacteria	Rhodospirillales	Rhodospirillaceae
AC-647_D03_Cp_6.8_bact_AAIW_505m_OGA_all	Bacteria	Proteobacteria	Alphaproteobacteria	Rhodospirillales	Rhodospirillaceae
AC-649_B03_Cp_7.8_bact_PSIW_303m_OGA_all	Bacteria	Proteobacteria	Alphaproteobacteria	Rhodospirillales	Rhodospirillaceae
AC-649_C08_Cp_8.7_bact_PSIW_303m_OGA_all	Bacteria	Proteobacteria	Alphaproteobacteria	Rhodospirillales	Rhodospirillaceae
AC-649_G21_Cp_9.2_bact_PSIW_303m_OGA_all	Bacteria	Proteobacteria	Alphaproteobacteria	Rhodospirillales	Rhodospirillaceae
AC-649_J18_Cp_11.9_bact_PSIW_303m_OGA_all	Bacteria	Proteobacteria	Alphaproteobacteria	Rhodospirillales	Rhodospirillaceae
AC-657_P08_Cp_12.2_bact_AABW_9696m_OGA_all	Bacteria	Proteobacteria	Alphaproteobacteria	Rhodospirillales	Rhodospirillaceae
AC-661_L07_Cp_11.1_bact_AABW_5010m_OGA_all	Bacteria	Proteobacteria	Alphaproteobacteria	Rhodospirillales	Rhodospirillaceae
AC-724_M23_Cp_12.9_bact_MDW_3000m_MED_HNA	Bacteria	Proteobacteria	Alphaproteobacteria	Rhodospirillales	Rhodospirillaceae
AC-738_C23_Cp_6.8_bact_MIW_600m_MED_HNA	Bacteria	Proteobacteria	Alphaproteobacteria	Rhodospirillales	Rhodospirillaceae
AC-738_D04_Cp_11.9_bact_MIW_600m_MED_HNA	Bacteria	Proteobacteria	Alphaproteobacteria	Rhodospirillales	Rhodospirillaceae
AC-738_D20_Cp_8.5_bact_MIW_600m_MED_HNA	Bacteria	Proteobacteria	Alphaproteobacteria	Rhodospirillales	Rhodospirillaceae
AC-738_G14_Cp_13.7_bact_MIW_600m_MED_HNA	Bacteria	Proteobacteria	Alphaproteobacteria	Rhodospirillales	Rhodospirillaceae
AC-738_K19_Cp_8.5_bact_MIW_600m_MED_HNA	Bacteria	Proteobacteria	Alphaproteobacteria	Rhodospirillales	Rhodospirillaceae
AC-738_O09_Cp_10.4_bact_MIW_600m_MED_HNA	Bacteria	Proteobacteria	Alphaproteobacteria	Rhodospirillales	Rhodospirillaceae
AC-647_D22_Cp_5.3_bact_AAIW_505m_OGA_all	Bacteria	Proteobacteria	Alphaproteobacteria	Rhodospirillales	Rhodospirillaceae	AEGEAN-169 marine group
AC-649_L10_Cp_8.5_bact_PSIW_303m_OGA_all	Bacteria	Proteobacteria	Alphaproteobacteria	Rhodospirillales	Rhodospirillaceae	AEGEAN-169 marine group
AC-665_E11_Cp_5.2_bact_AABW_2015m_OGA_all	Bacteria	Proteobacteria	Alphaproteobacteria	Rhodospirillales	Rhodospirillaceae	AEGEAN-169 marine group
AC-738_B21_Cp_6.7_bact_MIW_600m_MED_HNA	Bacteria	Proteobacteria	Alphaproteobacteria	Rhodospirillales	Rhodospirillaceae	AEGEAN-169 marine group
AC-738_J07_Cp_5.9_bact_MIW_600m_MED_HNA	Bacteria	Proteobacteria	Alphaproteobacteria	Rhodospirillales	Rhodospirillaceae	AEGEAN-169 marine group
AC-738_N19_Cp_6.6_bact_MIW_600m_MED_HNA	Bacteria	Proteobacteria	Alphaproteobacteria	Rhodospirillales	Rhodospirillaceae	AEGEAN-169 marine group
AC-647_D11_Cp_9.5_bact_AAIW_505m_OGA_all	Bacteria	Proteobacteria	Alphaproteobacteria	Rhodospirillales	Rhodospirillaceae	Defluviicoccus
AC-647_F21_Cp_8.0_bact_AAIW_505m_OGA_all	Bacteria	Proteobacteria	Alphaproteobacteria	Rhodospirillales	Rhodospirillaceae	Defluviicoccus
AC-647_O19_Cp_8.2_bact_AAIW_505m_OGA_all	Bacteria	Proteobacteria	Alphaproteobacteria	Rhodospirillales	Rhodospirillaceae	Defluviicoccus
AC-665_L10_Cp_10.7_bact_AABW_2015m_OGA_all	Bacteria	Proteobacteria	Alphaproteobacteria	Rhodospirillales	Rhodospirillaceae	Unknown Rhodospirillaceae genus
AC-738_I21_Cp_12.1_bact_MIW_600m_MED_HNA	Bacteria	Proteobacteria	Alphaproteobacteria	Rhodospirillales	Rhodospirillaceae	Unknown Rhodospirillaceae genus
AC-647_A15_Cp_5.3_bact_AAIW_505m_OGA_all	Bacteria	Proteobacteria	Alphaproteobacteria	Rhodospirillales	Unknown Rhodospirillales family
AC-647_D06_Cp_7.5_bact_AAIW_505m_OGA_all	Bacteria	Proteobacteria	Alphaproteobacteria	Rhodospirillales	Unknown Rhodospirillales family
AC-647_E03_Cp_7.2_bact_AAIW_505m_OGA_all	Bacteria	Proteobacteria	Alphaproteobacteria	Rhodospirillales	Unknown Rhodospirillales family
AC-661_E18_Cp_9.4_bact_AABW_5010m_OGA_all	Bacteria	Proteobacteria	Alphaproteobacteria	Rhodospirillales	Unknown Rhodospirillales family
AC-728_L03_Cp_9.0_bact_MDW_3000m_MED_LNA	Bacteria	Proteobacteria	Alphaproteobacteria	Rhodospirillales	Unknown Rhodospirillales family
AC-738_D16_Cp_12.7_bact_MIW_600m_MED_HNA	Bacteria	Proteobacteria	Alphaproteobacteria	Rhodospirillales	Unknown Rhodospirillales family
AC-665_A10_Cp_8.6_bact_AABW_2015m_OGA_all	Bacteria	Proteobacteria	Alphaproteobacteria	SAR11 clade
AC-665_C21_Cp_5.7_bact_AABW_2015m_OGA_all	Bacteria	Proteobacteria	Alphaproteobacteria	SAR11 clade
AC-665_D17_Cp_6.8_bact_AABW_2015m_OGA_all	Bacteria	Proteobacteria	Alphaproteobacteria	SAR11 clade
AC-665_E17_Cp_5.5_bact_AABW_2015m_OGA_all	Bacteria	Proteobacteria	Alphaproteobacteria	SAR11 clade
AC-728_C11_Cp_8.0_bact_MDW_3000m_MED_LNA	Bacteria	Proteobacteria	Alphaproteobacteria	SAR11 clade
AC-728_C16_Cp_6.7_bact_MDW_3000m_MED_LNA	Bacteria	Proteobacteria	Alphaproteobacteria	SAR11 clade
AC-728_D13_Cp_6.8_bact_MDW_3000m_MED_LNA	Bacteria	Proteobacteria	Alphaproteobacteria	SAR11 clade
AC-728_D19_Cp_7.6_bact_MDW_3000m_MED_LNA	Bacteria	Proteobacteria	Alphaproteobacteria	SAR11 clade
AC-728_E18_Cp_7.7_bact_MDW_3000m_MED_LNA	Bacteria	Proteobacteria	Alphaproteobacteria	SAR11 clade
AC-728_F09_Cp_9.2_bact_MDW_3000m_MED_LNA	Bacteria	Proteobacteria	Alphaproteobacteria	SAR11 clade
AC-728_G18_Cp_6.9_bact_MDW_3000m_MED_LNA	Bacteria	Proteobacteria	Alphaproteobacteria	SAR11 clade
AC-728_I11_Cp_7.7_bact_MDW_3000m_MED_LNA	Bacteria	Proteobacteria	Alphaproteobacteria	SAR11 clade
AC-728_I17_Cp_8.0_bact_MDW_3000m_MED_LNA	Bacteria	Proteobacteria	Alphaproteobacteria	SAR11 clade
AC-728_J16_Cp_9.1_bact_MDW_3000m_MED_LNA	Bacteria	Proteobacteria	Alphaproteobacteria	SAR11 clade
AC-728_M15_Cp_7.5_bact_MDW_3000m_MED_LNA	Bacteria	Proteobacteria	Alphaproteobacteria	SAR11 clade
AC-728_N06_Cp_6.4_bact_MDW_3000m_MED_LNA	Bacteria	Proteobacteria	Alphaproteobacteria	SAR11 clade
AC-728_N21_Cp_6.6_bact_MDW_3000m_MED_LNA	Bacteria	Proteobacteria	Alphaproteobacteria	SAR11 clade
AC-647_E20_Cp_6.6_bact_AAIW_505m_OGA_all	Bacteria	Proteobacteria	Alphaproteobacteria	SAR11 clade	Deep 1
AC-649_I14_Cp_5.3_bact_PSIW_303m_OGA_all	Bacteria	Proteobacteria	Alphaproteobacteria	SAR11 clade	Deep 1
AC-649_J04_Cp_6.0_bact_PSIW_303m_OGA_all	Bacteria	Proteobacteria	Alphaproteobacteria	SAR11 clade	Deep 1
AC-661_E05_Cp_7.2_bact_AABW_5010m_OGA_all	Bacteria	Proteobacteria	Alphaproteobacteria	SAR11 clade	Deep 1
AC-665_I19_Cp_5.0_bact_AABW_2015m_OGA_all	Bacteria	Proteobacteria	Alphaproteobacteria	SAR11 clade	Deep 1
AC-665_J05_Cp_6.8_bact_AABW_2015m_OGA_all	Bacteria	Proteobacteria	Alphaproteobacteria	SAR11 clade	Deep 1
AC-665_P18_Cp_5.5_bact_AABW_2015m_OGA_all	Bacteria	Proteobacteria	Alphaproteobacteria	SAR11 clade	Deep 1
AC-728_A21_Cp_7.1_bact_MDW_3000m_MED_LNA	Bacteria	Proteobacteria	Alphaproteobacteria	SAR11 clade	Deep 1
AC-728_B08_Cp_7.3_bact_MDW_3000m_MED_LNA	Bacteria	Proteobacteria	Alphaproteobacteria	SAR11 clade	Deep 1
AC-728_B11_Cp_6.6_bact_MDW_3000m_MED_LNA	Bacteria	Proteobacteria	Alphaproteobacteria	SAR11 clade	Deep 1
AC-728_B20_Cp_6.5_bact_MDW_3000m_MED_LNA	Bacteria	Proteobacteria	Alphaproteobacteria	SAR11 clade	Deep 1
AC-728_D11_Cp_8.5_bact_MDW_3000m_MED_LNA	Bacteria	Proteobacteria	Alphaproteobacteria	SAR11 clade	Deep 1
AC-728_E19_Cp_6.6_bact_MDW_3000m_MED_LNA	Bacteria	Proteobacteria	Alphaproteobacteria	SAR11 clade	Deep 1
AC-728_E23_Cp_6.6_bact_MDW_3000m_MED_LNA	Bacteria	Proteobacteria	Alphaproteobacteria	SAR11 clade	Deep 1
AC-728_F06_Cp_6.3_bact_MDW_3000m_MED_LNA	Bacteria	Proteobacteria	Alphaproteobacteria	SAR11 clade	Deep 1
AC-728_F14_Cp_6.4_bact_MDW_3000m_MED_LNA	Bacteria	Proteobacteria	Alphaproteobacteria	SAR11 clade	Deep 1
AC-728_F15_Cp_6.2_bact_MDW_3000m_MED_LNA	Bacteria	Proteobacteria	Alphaproteobacteria	SAR11 clade	Deep 1
AC-728_F19_Cp_7.2_bact_MDW_3000m_MED_LNA	Bacteria	Proteobacteria	Alphaproteobacteria	SAR11 clade	Deep 1
AC-728_G17_Cp_7.8_bact_MDW_3000m_MED_LNA	Bacteria	Proteobacteria	Alphaproteobacteria	SAR11 clade	Deep 1
AC-728_I02_Cp_6.8_bact_MDW_3000m_MED_LNA	Bacteria	Proteobacteria	Alphaproteobacteria	SAR11 clade	Deep 1
AC-728_I19_Cp_6.9_bact_MDW_3000m_MED_LNA	Bacteria	Proteobacteria	Alphaproteobacteria	SAR11 clade	Deep 1
AC-728_I23_Cp_6.4_bact_MDW_3000m_MED_LNA	Bacteria	Proteobacteria	Alphaproteobacteria	SAR11 clade	Deep 1
AC-728_K18_Cp_8.2_bact_MDW_3000m_MED_LNA	Bacteria	Proteobacteria	Alphaproteobacteria	SAR11 clade	Deep 1
AC-728_K19_Cp_7.4_bact_MDW_3000m_MED_LNA	Bacteria	Proteobacteria	Alphaproteobacteria	SAR11 clade	Deep 1
AC-728_K20_Cp_6.8_bact_MDW_3000m_MED_LNA	Bacteria	Proteobacteria	Alphaproteobacteria	SAR11 clade	Deep 1
AC-728_L19_Cp_7.5_bact_MDW_3000m_MED_LNA	Bacteria	Proteobacteria	Alphaproteobacteria	SAR11 clade	Deep 1
AC-728_L23_Cp_6.8_bact_MDW_3000m_MED_LNA	Bacteria	Proteobacteria	Alphaproteobacteria	SAR11 clade	Deep 1
AC-728_M23_Cp_6.2_bact_MDW_3000m_MED_LNA	Bacteria	Proteobacteria	Alphaproteobacteria	SAR11 clade	Deep 1
AC-728_N15_Cp_10.7_bact_MDW_3000m_MED_LNA	Bacteria	Proteobacteria	Alphaproteobacteria	SAR11 clade	Deep 1
AC-728_N23_Cp_6.5_bact_MDW_3000m_MED_LNA	Bacteria	Proteobacteria	Alphaproteobacteria	SAR11 clade	Deep 1
AC-728_O10_Cp_6.5_bact_MDW_3000m_MED_LNA	Bacteria	Proteobacteria	Alphaproteobacteria	SAR11 clade	Deep 1
AC-728_P03_Cp_7.8_bact_MDW_3000m_MED_LNA	Bacteria	Proteobacteria	Alphaproteobacteria	SAR11 clade	Deep 1
AC-728_P13_Cp_7.3_bact_MDW_3000m_MED_LNA	Bacteria	Proteobacteria	Alphaproteobacteria	SAR11 clade	Deep 1
AC-728_P16_Cp_6.3_bact_MDW_3000m_MED_LNA	Bacteria	Proteobacteria	Alphaproteobacteria	SAR11 clade	Deep 1
AC-728_P18_Cp_6.5_bact_MDW_3000m_MED_LNA	Bacteria	Proteobacteria	Alphaproteobacteria	SAR11 clade	Deep 1
AC-728_P19_Cp_7.3_bact_MDW_3000m_MED_LNA	Bacteria	Proteobacteria	Alphaproteobacteria	SAR11 clade	Deep 1
AC-728_P22_Cp_7.5_bact_MDW_3000m_MED_LNA	Bacteria	Proteobacteria	Alphaproteobacteria	SAR11 clade	Deep 1
AC-732_D07_Cp_7.6_bact_MDW_3500m_MED_HNA	Bacteria	Proteobacteria	Alphaproteobacteria	SAR11 clade	Deep 1
AC-738_O22_Cp_6.3_bact_MIW_600m_MED_HNA	Bacteria	Proteobacteria	Alphaproteobacteria	SAR11 clade	Deep 1
AC-647_A23_Cp_5.9_bact_AAIW_505m_OGA_all	Bacteria	Proteobacteria	Alphaproteobacteria	SAR11 clade	Surface 1
AC-647_I15_Cp_5.2_bact_AAIW_505m_OGA_all	Bacteria	Proteobacteria	Alphaproteobacteria	SAR11 clade	Surface 1
AC-647_P04_Cp_5.9_bact_AAIW_505m_OGA_all	Bacteria	Proteobacteria	Alphaproteobacteria	SAR11 clade	Surface 1
AC-647_P18_Cp_6.7_bact_AAIW_505m_OGA_all	Bacteria	Proteobacteria	Alphaproteobacteria	SAR11 clade	Surface 1
AC-649_G14_Cp_5.5_bact_PSIW_303m_OGA_all	Bacteria	Proteobacteria	Alphaproteobacteria	SAR11 clade	Surface 1
AC-649_N11_Cp_5.0_bact_PSIW_303m_OGA_all	Bacteria	Proteobacteria	Alphaproteobacteria	SAR11 clade	Surface 1
AC-661_L04_Cp_5.0_bact_AABW_5010m_OGA_all	Bacteria	Proteobacteria	Alphaproteobacteria	SAR11 clade	Surface 1
AC-665_C07_Cp_5.9_bact_AABW_2015m_OGA_all	Bacteria	Proteobacteria	Alphaproteobacteria	SAR11 clade	Surface 1
AC-728_A14_Cp_8.1_bact_MDW_3000m_MED_LNA	Bacteria	Proteobacteria	Alphaproteobacteria	SAR11 clade	Surface 1
AC-728_B14_Cp_7.6_bact_MDW_3000m_MED_LNA	Bacteria	Proteobacteria	Alphaproteobacteria	SAR11 clade	Surface 1
AC-728_B17_Cp_6.7_bact_MDW_3000m_MED_LNA	Bacteria	Proteobacteria	Alphaproteobacteria	SAR11 clade	Surface 1
AC-728_C13_Cp_9.2_bact_MDW_3000m_MED_LNA	Bacteria	Proteobacteria	Alphaproteobacteria	SAR11 clade	Surface 1
AC-728_E02_Cp_5.9_bact_MDW_3000m_MED_LNA	Bacteria	Proteobacteria	Alphaproteobacteria	SAR11 clade	Surface 1
AC-732_G09_Cp_8.1_bact_MDW_3500m_MED_HNA	Bacteria	Proteobacteria	Alphaproteobacteria	SAR11 clade	Surface 1
AC-738_F18_Cp_7.4_bact_MIW_600m_MED_HNA	Bacteria	Proteobacteria	Alphaproteobacteria	SAR11 clade	Surface 1
AC-738_G19_Cp_6.8_bact_MIW_600m_MED_HNA	Bacteria	Proteobacteria	Alphaproteobacteria	SAR11 clade	Surface 1
AC-738_J13_Cp_6.2_bact_MIW_600m_MED_HNA	Bacteria	Proteobacteria	Alphaproteobacteria	SAR11 clade	Surface 1
AC-738_L02_Cp_8.4_bact_MIW_600m_MED_HNA	Bacteria	Proteobacteria	Alphaproteobacteria	SAR11 clade	Surface 1
AC-649_A17_Cp_7.3_bact_PSIW_303m_OGA_all	Bacteria	Proteobacteria	Gammaproteobacteria
AC-647_C06_Cp_7.0_bact_AAIW_505m_OGA_all	Bacteria	Proteobacteria	Gammaproteobacteria	E01-9C-26 marine group
AC-647_C10_Cp_8.7_bact_AAIW_505m_OGA_all	Bacteria	Proteobacteria	Gammaproteobacteria	E01-9C-26 marine group
AC-647_G06_Cp_8.9_bact_AAIW_505m_OGA_all	Bacteria	Proteobacteria	Gammaproteobacteria	E01-9C-26 marine group
AC-647_J17_Cp_7.8_bact_AAIW_505m_OGA_all	Bacteria	Proteobacteria	Gammaproteobacteria	E01-9C-26 marine group
AC-647_P03_Cp_7.7_bact_AAIW_505m_OGA_all	Bacteria	Proteobacteria	Gammaproteobacteria	E01-9C-26 marine group
AC-649_C02_Cp_10.5_bact_PSIW_303m_OGA_all	Bacteria	Proteobacteria	Gammaproteobacteria	E01-9C-26 marine group
AC-649_K06_Cp_11.8_bact_PSIW_303m_OGA_all	Bacteria	Proteobacteria	Gammaproteobacteria	E01-9C-26 marine group
AC-649_N05_Cp_9.9_bact_PSIW_303m_OGA_all	Bacteria	Proteobacteria	Gammaproteobacteria	E01-9C-26 marine group
AC-649_N13_Cp_10.0_bact_PSIW_303m_OGA_all	Bacteria	Proteobacteria	Gammaproteobacteria	E01-9C-26 marine group
AC-665_I10_Cp_8.2_bact_AABW_2015m_OGA_all	Bacteria	Proteobacteria	Gammaproteobacteria	E01-9C-26 marine group
AC-665_L11_Cp_6.9_bact_AABW_2015m_OGA_all	Bacteria	Proteobacteria	Gammaproteobacteria	E01-9C-26 marine group
AC-724_G14_Cp_9.3_bact_MDW_3000m_MED_HNA	Bacteria	Proteobacteria	Gammaproteobacteria	E01-9C-26 marine group
AC-724_I16_Cp_10.1_bact_MDW_3000m_MED_HNA	Bacteria	Proteobacteria	Gammaproteobacteria	E01-9C-26 marine group
AC-724_O15_Cp_9.6_bact_MDW_3000m_MED_HNA	Bacteria	Proteobacteria	Gammaproteobacteria	E01-9C-26 marine group
AC-724_P04_Cp_9.9_bact_MDW_3000m_MED_HNA	Bacteria	Proteobacteria	Gammaproteobacteria	E01-9C-26 marine group
AC-724_P06_Cp_10.4_bact_MDW_3000m_MED_HNA	Bacteria	Proteobacteria	Gammaproteobacteria	E01-9C-26 marine group
AC-724_P10_Cp_7.7_bact_MDW_3000m_MED_HNA	Bacteria	Proteobacteria	Gammaproteobacteria	E01-9C-26 marine group
AC-724_P11_Cp_8.7_bact_MDW_3000m_MED_HNA	Bacteria	Proteobacteria	Gammaproteobacteria	E01-9C-26 marine group
AC-728_P21_Cp_11.4_bact_MDW_3000m_MED_LNA	Bacteria	Proteobacteria	Gammaproteobacteria	E01-9C-26 marine group
AC-732_D10_Cp_10.2_bact_MDW_3500m_MED_HNA	Bacteria	Proteobacteria	Gammaproteobacteria	E01-9C-26 marine group
AC-732_E07_Cp_13.5_bact_MDW_3500m_MED_HNA	Bacteria	Proteobacteria	Gammaproteobacteria	E01-9C-26 marine group
AC-732_J05_Cp_8.8_bact_MDW_3500m_MED_HNA	Bacteria	Proteobacteria	Gammaproteobacteria	E01-9C-26 marine group
AC-738_E23_Cp_8.8_bact_MIW_600m_MED_HNA	Bacteria	Proteobacteria	Gammaproteobacteria	E01-9C-26 marine group
AC-738_L22_Cp_5.9_bact_MIW_600m_MED_HNA	Bacteria	Proteobacteria	Gammaproteobacteria	E01-9C-26 marine group
AC-738_O21_Cp_9.8_bact_MIW_600m_MED_HNA	Bacteria	Proteobacteria	Gammaproteobacteria	E01-9C-26 marine group
AC-665_I16_Cp_8.1_bact_AABW_2015m_OGA_all	Bacteria	Proteobacteria	Gammaproteobacteria	KI89A clade
AC-728_K02_Cp_9.1_bact_MDW_3000m_MED_LNA	Bacteria	Proteobacteria	Gammaproteobacteria	Legionellales	Unknown Legionellales family
AC-732_D05_Cp_7.3_bact_MDW_3500m_MED_HNA	Bacteria	Proteobacteria	Gammaproteobacteria	Legionellales	Unknown Legionellales family
AC-661_C07_Cp_8.8_bact_AABW_5010m_OGA_all	Bacteria	Proteobacteria	Gammaproteobacteria	Salinisphaerales	Salinisphaeraceae	ZD0417 marine group
AC-661_G10_Cp_5.6_bact_AABW_5010m_OGA_all	Bacteria	Proteobacteria	Gammaproteobacteria	Salinisphaerales	Salinisphaeraceae	ZD0417 marine group
AC-661_K11_Cp_6.4_bact_AABW_5010m_OGA_all	Bacteria	Proteobacteria	Gammaproteobacteria	Salinisphaerales	Salinisphaeraceae	ZD0417 marine group
AC-665_A04_Cp_5.2_bact_AABW_2015m_OGA_all	Bacteria	Proteobacteria	Gammaproteobacteria	Salinisphaerales	Salinisphaeraceae	ZD0417 marine group
AC-665_F21_Cp_7.2_bact_AABW_2015m_OGA_all	Bacteria	Proteobacteria	Gammaproteobacteria	Salinisphaerales	Salinisphaeraceae	ZD0417 marine group
AC-665_L06_Cp_6.0_bact_AABW_2015m_OGA_all	Bacteria	Proteobacteria	Gammaproteobacteria	Salinisphaerales	Salinisphaeraceae	ZD0417 marine group
AC-724_C17_Cp_7.5_bact_MDW_3000m_MED_HNA	Bacteria	Proteobacteria	Gammaproteobacteria	Salinisphaerales	Salinisphaeraceae	ZD0417 marine group
AC-738_I15_Cp_7.3_bact_MIW_600m_MED_HNA	Bacteria	Proteobacteria	Gammaproteobacteria	Salinisphaerales	Salinisphaeraceae	ZD0417 marine group
AC-802_I16_Cp_7.9_bact_NADW_3200m_NA_all	Bacteria	Proteobacteria	Gammaproteobacteria	Salinisphaerales	Salinisphaeraceae	ZD0417 marine group
AC-724_D07_Cp_11.8_bact_MDW_3000m_MED_HNA	Bacteria	Proteobacteria	Gammaproteobacteria	Alteromonadales	Idiomarinaceae	Idiomarina
AC-724_D15_Cp_10.4_bact_MDW_3000m_MED_HNA	Bacteria	Proteobacteria	Gammaproteobacteria	Alteromonadales	Idiomarinaceae	Idiomarina
AC-724_E06_Cp_7.5_bact_MDW_3000m_MED_HNA	Bacteria	Proteobacteria	Gammaproteobacteria	Alteromonadales	Idiomarinaceae	Idiomarina
AC-724_I04_Cp_7.5_bact_MDW_3000m_MED_HNA	Bacteria	Proteobacteria	Gammaproteobacteria	Alteromonadales	Idiomarinaceae	Idiomarina
AC-724_J07_Cp_10.9_bact_MDW_3000m_MED_HNA	Bacteria	Proteobacteria	Gammaproteobacteria	Alteromonadales	Idiomarinaceae	Idiomarina
AC-724_K05_Cp_9.1_bact_MDW_3000m_MED_HNA	Bacteria	Proteobacteria	Gammaproteobacteria	Alteromonadales	Idiomarinaceae	Idiomarina
AC-732_G18_Cp_11.3_bact_MDW_3500m_MED_HNA	Bacteria	Proteobacteria	Gammaproteobacteria	Alteromonadales	Idiomarinaceae	Idiomarina
AC-724_L13_Cp_13.2_bact_MDW_3000m_MED_HNA	Bacteria	Proteobacteria	Gammaproteobacteria	Alteromonadales	Alteromonadaceae	Alteromonas
AC-724_M17_Cp_10.0_bact_MDW_3000m_MED_HNA	Bacteria	Proteobacteria	Gammaproteobacteria	Alteromonadales	Alteromonadaceae	Alteromonas
AC-732_A07_Cp_8.9_bact_MDW_3500m_MED_HNA	Bacteria	Proteobacteria	Gammaproteobacteria	Alteromonadales	Alteromonadaceae	Alteromonas
AC-732_C06_Cp_10.0_bact_MDW_3500m_MED_HNA	Bacteria	Proteobacteria	Gammaproteobacteria	Alteromonadales	Alteromonadaceae	Alteromonas
AC-732_C08_Cp_9.2_bact_MDW_3500m_MED_HNA	Bacteria	Proteobacteria	Gammaproteobacteria	Alteromonadales	Alteromonadaceae	Alteromonas
AC-732_C13_Cp_11.3_bact_MDW_3500m_MED_HNA	Bacteria	Proteobacteria	Gammaproteobacteria	Alteromonadales	Alteromonadaceae	Alteromonas
AC-732_G10_Cp_9.9_bact_MDW_3500m_MED_HNA	Bacteria	Proteobacteria	Gammaproteobacteria	Alteromonadales	Alteromonadaceae	Alteromonas
AC-732_G13_Cp_10.2_bact_MDW_3500m_MED_HNA	Bacteria	Proteobacteria	Gammaproteobacteria	Alteromonadales	Alteromonadaceae	Alteromonas
AC-732_I02_Cp_9.0_bact_MDW_3500m_MED_HNA	Bacteria	Proteobacteria	Gammaproteobacteria	Alteromonadales	Alteromonadaceae	Alteromonas
AC-732_J09_Cp_7.9_bact_MDW_3500m_MED_HNA	Bacteria	Proteobacteria	Gammaproteobacteria	Alteromonadales	Alteromonadaceae	Alteromonas
AC-732_J14_Cp_9.9_bact_MDW_3500m_MED_HNA	Bacteria	Proteobacteria	Gammaproteobacteria	Alteromonadales	Alteromonadaceae	Alteromonas
AC-732_K05_Cp_9.4_bact_MDW_3500m_MED_HNA	Bacteria	Proteobacteria	Gammaproteobacteria	Alteromonadales	Alteromonadaceae	Alteromonas
AC-732_K06_Cp_9.0_bact_MDW_3500m_MED_HNA	Bacteria	Proteobacteria	Gammaproteobacteria	Alteromonadales	Alteromonadaceae	Alteromonas
AC-732_K13_Cp_8.8_bact_MDW_3500m_MED_HNA	Bacteria	Proteobacteria	Gammaproteobacteria	Alteromonadales	Alteromonadaceae	Alteromonas
AC-732_K16_Cp_8.1_bact_MDW_3500m_MED_HNA	Bacteria	Proteobacteria	Gammaproteobacteria	Alteromonadales	Alteromonadaceae	Alteromonas
AC-732_M14_Cp_12.1_bact_MDW_3500m_MED_HNA	Bacteria	Proteobacteria	Gammaproteobacteria	Alteromonadales	Alteromonadaceae	Alteromonas
AC-732_N03_Cp_8.6_bact_MDW_3500m_MED_HNA	Bacteria	Proteobacteria	Gammaproteobacteria	Alteromonadales	Alteromonadaceae	Alteromonas
AC-732_N16_Cp_8.9_bact_MDW_3500m_MED_HNA	Bacteria	Proteobacteria	Gammaproteobacteria	Alteromonadales	Alteromonadaceae	Alteromonas
AC-732_N18_Cp_10.3_bact_MDW_3500m_MED_HNA	Bacteria	Proteobacteria	Gammaproteobacteria	Alteromonadales	Alteromonadaceae	Alteromonas
AC-732_O14_Cp_10.8_bact_MDW_3500m_MED_HNA	Bacteria	Proteobacteria	Gammaproteobacteria	Alteromonadales	Alteromonadaceae	Alteromonas
AC-732_O19_Cp_8.1_bact_MDW_3500m_MED_HNA	Bacteria	Proteobacteria	Gammaproteobacteria	Alteromonadales	Alteromonadaceae	Alteromonas
AC-732_P05_Cp_12.9_bact_MDW_3500m_MED_HNA	Bacteria	Proteobacteria	Gammaproteobacteria	Alteromonadales	Alteromonadaceae	Alteromonas
AC-732_P10_Cp_10.0_bact_MDW_3500m_MED_HNA	Bacteria	Proteobacteria	Gammaproteobacteria	Alteromonadales	Alteromonadaceae	Alteromonas
AC-738_A21_Cp_13.1_bact_MIW_600m_MED_HNA	Bacteria	Proteobacteria	Gammaproteobacteria	Alteromonadales	Alteromonadaceae	Alteromonas
AC-738_B15_Cp_9.5_bact_MIW_600m_MED_HNA	Bacteria	Proteobacteria	Gammaproteobacteria	Alteromonadales	Alteromonadaceae	Alteromonas
AC-738_O20_Cp_9.6_bact_MIW_600m_MED_HNA	Bacteria	Proteobacteria	Gammaproteobacteria	Alteromonadales	Alteromonadaceae	Alteromonas
AC-665_M17_Cp_11.3_bact_AABW_2015m_OGA_all	Bacteria	Proteobacteria	Gammaproteobacteria	Alteromonadales	Alteromonadaceae	Marinobacter
AC-647_D14_Cp_6.4_bact_AAIW_505m_OGA_all	Bacteria	Proteobacteria	Gammaproteobacteria	Oceanospirillales
AC-647_O05_Cp_6.6_bact_AAIW_505m_OGA_all	Bacteria	Proteobacteria	Gammaproteobacteria	Oceanospirillales
AC-665_P19_Cp_5.7_bact_AABW_2015m_OGA_all	Bacteria	Proteobacteria	Gammaproteobacteria	Oceanospirillales	ZD0405
AC-661_I03_Cp_8.8_bact_AABW_5010m_OGA_all	Bacteria	Proteobacteria	Gammaproteobacteria	Oceanospirillales	SUP05 cluster
AC-665_K23_Cp_11.9_bact_AABW_2015m_OGA_all	Bacteria	Proteobacteria	Gammaproteobacteria	Oceanospirillales	Alcanivoracaceae	Alcanivorax
AC-665_P11_Cp_13.3_bact_AABW_2015m_OGA_all	Bacteria	Proteobacteria	Gammaproteobacteria	Oceanospirillales	Alcanivoracaceae	Alcanivorax
AC-732_O22_Cp_13.8_bact_MDW_3500m_MED_HNA	Bacteria	Proteobacteria	Gammaproteobacteria	Oceanospirillales	Alcanivoracaceae	Alcanivorax
AC-724_A18_Cp_12.5_bact_MDW_3000m_MED_HNA	Bacteria	Proteobacteria	Gammaproteobacteria	Oceanospirillales	Halomonadaceae	Halomonas
AC-724_E08_Cp_10.0_bact_MDW_3000m_MED_HNA	Bacteria	Proteobacteria	Gammaproteobacteria	Oceanospirillales	Halomonadaceae	Halomonas
AC-724_G06_Cp_12.6_bact_MDW_3000m_MED_HNA	Bacteria	Proteobacteria	Gammaproteobacteria	Oceanospirillales	Halomonadaceae	Halomonas
AC-724_G20_Cp_12.2_bact_MDW_3000m_MED_HNA	Bacteria	Proteobacteria	Gammaproteobacteria	Oceanospirillales	Halomonadaceae	Halomonas
AC-724_J17_Cp_13.7_bact_MDW_3000m_MED_HNA	Bacteria	Proteobacteria	Gammaproteobacteria	Oceanospirillales	Halomonadaceae	Halomonas
AC-724_P21_Cp_12.6_bact_MDW_3000m_MED_HNA	Bacteria	Proteobacteria	Gammaproteobacteria	Oceanospirillales	Halomonadaceae	Halomonas
AC-732_A03_Cp_11.8_bact_MDW_3500m_MED_HNA	Bacteria	Proteobacteria	Gammaproteobacteria	Oceanospirillales	Halomonadaceae	Halomonas
AC-732_A10_Cp_12.8_bact_MDW_3500m_MED_HNA	Bacteria	Proteobacteria	Gammaproteobacteria	Oceanospirillales	Halomonadaceae	Halomonas
AC-732_B08_Cp_11.5_bact_MDW_3500m_MED_HNA	Bacteria	Proteobacteria	Gammaproteobacteria	Oceanospirillales	Halomonadaceae	Halomonas
AC-732_C10_Cp_13.3_bact_MDW_3500m_MED_HNA	Bacteria	Proteobacteria	Gammaproteobacteria	Oceanospirillales	Halomonadaceae	Halomonas
AC-732_I09_Cp_12.5_bact_MDW_3500m_MED_HNA	Bacteria	Proteobacteria	Gammaproteobacteria	Oceanospirillales	Halomonadaceae	Halomonas
AC-732_J06_Cp_12.7_bact_MDW_3500m_MED_HNA	Bacteria	Proteobacteria	Gammaproteobacteria	Oceanospirillales	Halomonadaceae	Halomonas
AC-732_J13_Cp_13.4_bact_MDW_3500m_MED_HNA	Bacteria	Proteobacteria	Gammaproteobacteria	Oceanospirillales	Halomonadaceae	Halomonas
AC-732_K21_Cp_12.8_bact_MDW_3500m_MED_HNA	Bacteria	Proteobacteria	Gammaproteobacteria	Oceanospirillales	Halomonadaceae	Halomonas
AC-738_J14_Cp_13.6_bact_MIW_600m_MED_HNA	Bacteria	Proteobacteria	Gammaproteobacteria	Oceanospirillales	Halomonadaceae	Halomonas
AC-738_L08_Cp_12.4_bact_MIW_600m_MED_HNA	Bacteria	Proteobacteria	Gammaproteobacteria	Oceanospirillales	Halomonadaceae	Halomonas
AC-647_O08_Cp_9.7_bact_AAIW_505m_OGA_all	Bacteria	Proteobacteria	Gammaproteobacteria	Oceanospirillales	OM182 clade
AC-657_A03_Cp_8.9_bact_AABW_9696m_OGA_all	Bacteria	Proteobacteria	Gammaproteobacteria	Oceanospirillales	Oceanospirillaceae	Pseudospirillum
AC-657_C13_Cp_10.8_bact_AABW_9696m_OGA_all	Bacteria	Proteobacteria	Gammaproteobacteria	Oceanospirillales	Oceanospirillaceae	Pseudospirillum
AC-657_N15_Cp_12.8_bact_AABW_9696m_OGA_all	Bacteria	Proteobacteria	Gammaproteobacteria	Oceanospirillales	Oceanospirillaceae	Pseudospirillum
AC-665_F04_Cp_9.4_bact_AABW_2015m_OGA_all	Bacteria	Proteobacteria	Gammaproteobacteria	Oceanospirillales	Oceanospirillaceae	Pseudospirillum
AC-649_A16_Cp_7.1_bact_PSIW_303m_OGA_all	Bacteria	Proteobacteria	Gammaproteobacteria	Oceanospirillales	SAR86 clade
AC-661_B20_Cp_5.2_bact_AABW_5010m_OGA_all	Bacteria	Proteobacteria	Gammaproteobacteria	Oceanospirillales	SAR86 clade
AC-661_N06_Cp_5.3_bact_AABW_5010m_OGA_all	Bacteria	Proteobacteria	Gammaproteobacteria	Oceanospirillales	SAR86 clade
AC-728_O08_Cp_6.2_bact_MDW_3000m_MED_LNA	Bacteria	Proteobacteria	Gammaproteobacteria	Oceanospirillales	SAR86 clade
AC-724_D06_Cp_8.7_bact_MDW_3000m_MED_HNA	Bacteria	Proteobacteria	Gammaproteobacteria	Oceanospirillales	Unknown Oceanospirillales family
AC-732_A20_Cp_9.7_bact_MDW_3500m_MED_HNA	Bacteria	Proteobacteria	Gammaproteobacteria	Oceanospirillales	Unknown Oceanospirillales family
AC-665_D07_Cp_11.8_bact_AABW_2015m_OGA_all	Bacteria	Proteobacteria	Gammaproteobacteria	Xanthomonadales	Sinobacteraceae
AC-647_L08_Cp_8.4_bact_AAIW_505m_OGA_all	Bacteria	Proteobacteria	Gammaproteobacteria	Xanthomonadales	Sinobacteraceae	JTB255 marine benthic group
AC-649_K19_Cp_9.7_bact_PSIW_303m_OGA_all	Bacteria	Proteobacteria	Gammaproteobacteria	Xanthomonadales	Sinobacteraceae	JTB255 marine benthic group
AC-728_F10_Cp_11.8_bact_MDW_3000m_MED_LNA	Bacteria	Proteobacteria	Gammaproteobacteria	Xanthomonadales	Sinobacteraceae	JTB255 marine benthic group
AC-649_B08_Cp_8.0_bact_PSIW_303m_OGA_all	Bacteria	Proteobacteria	Gammaproteobacteria	Unknown Gammaproteobacteria order
AD-107_L22_Cp_10.8_bact_LSW_2000m_NA_all	Bacteria	PAUC34f
AD-113_L08_Cp_11.3_bact_CDW_4000m_SI_all	Bacteria	PAUC34f
AD-107_D03_Cp_12.9_bact_LSW_2000m_NA_all	Bacteria	Gemmatimonadetes	Gemmatimonadetes (class)	BD2-11 terrestrial group
AD-131_I03_Cp_11.5_bact_OMZ_750m_NA_all	Bacteria	Gemmatimonadetes	Gemmatimonadetes (class)	BD2-11 terrestrial group
AD-263_B11_Cp_15.9_bact_LSW_1750m_NA_all	Bacteria	Gemmatimonadetes	Gemmatimonadetes (class)	BD2-11 terrestrial group
AD-263_K13_Cp_14.1_bact_LSW_1750m_NA_all	Bacteria	Gemmatimonadetes	Gemmatimonadetes (class)	BD2-11 terrestrial group
AD-113_B08_Cp_11.8_bact_CDW_4000m_SI_all	Bacteria	Lentisphaerae	Lentisphaeria	R76-B128
AD-105_B22_Cp_12.0_bact_LSW_2000m_NA_all	Bacteria	Lentisphaerae	Lentisphaeria	Victivallales	Victivallaceae
AD-261_N18_Cp_8.7_bact_NADW_3200m_NA_all	Bacteria	Nitrospirae	Nitrospira	Nitrospirales	Unknown Nitrospirales family
AD-103_D19_Cp_5.8_bact_LDW_3100m_NA_all	Bacteria	SAR406 clade(Marine group A)
AD-103_E20_Cp_6.9_bact_LDW_3100m_NA_all	Bacteria	SAR406 clade(Marine group A)
AD-103_N22_Cp_6.2_bact_LDW_3100m_NA_all	Bacteria	SAR406 clade(Marine group A)
AD-105_C07_Cp_6.0_bact_LSW_2000m_NA_all	Bacteria	SAR406 clade(Marine group A)
AD-105_J21_Cp_6.5_bact_LSW_2000m_NA_all	Bacteria	SAR406 clade(Marine group A)
AD-107_C15_Cp_6.2_bact_LSW_2000m_NA_all	Bacteria	SAR406 clade(Marine group A)
AD-107_L03_Cp_6.7_bact_LSW_2000m_NA_all	Bacteria	SAR406 clade(Marine group A)
AD-117_K22_Cp_5.7_bact_RSIW_500m_RS_all	Bacteria	SAR406 clade(Marine group A)
AD-129_B14_Cp_5.9_bact_NACW_300m_NA_all	Bacteria	SAR406 clade(Marine group A)
AD-129_M16_Cp_7.8_bact_NACW_300m_NA_all	Bacteria	SAR406 clade(Marine group A)
AD-129_P10_Cp_6.2_bact_NACW_300m_NA_all	Bacteria	SAR406 clade(Marine group A)
AD-131_N19_Cp_7.0_bact_OMZ_750m_NA_all	Bacteria	SAR406 clade(Marine group A)
AD-150_M04_Cp_8.9_bact_AAIW_1140m_SI_all	Bacteria	SAR406 clade(Marine group A)
AD-261_A16_Cp_7.0_bact_NADW_3200m_NA_all	Bacteria	SAR406 clade(Marine group A)
AD-261_B19_Cp_6.7_bact_NADW_3200m_NA_all	Bacteria	SAR406 clade(Marine group A)
AD-261_C16_Cp_7.3_bact_NADW_3200m_NA_all	Bacteria	SAR406 clade(Marine group A)
AD-261_D06_Cp_5.7_bact_NADW_3200m_NA_all	Bacteria	SAR406 clade(Marine group A)
AD-261_D10_Cp_7.4_bact_NADW_3200m_NA_all	Bacteria	SAR406 clade(Marine group A)
AD-261_I04_Cp_7.8_bact_NADW_3200m_NA_all	Bacteria	SAR406 clade(Marine group A)
AD-261_P17_Cp_5.1_bact_NADW_3200m_NA_all	Bacteria	SAR406 clade(Marine group A)
AD-263_E03_Cp_5.1_bact_LSW_1750m_NA_all	Bacteria	SAR406 clade(Marine group A)
AD-263_J04_Cp_4.0_bact_LSW_1750m_NA_all	Bacteria	SAR406 clade(Marine group A)
AD-265_B15_Cp_5.1_bact_NSDW_1750m_NA_all	Bacteria	SAR406 clade(Marine group A)
AD-103_M19_Cp_8.3_bact_LDW_3100m_NA_all	Bacteria	Verrucomicrobia	Arctic97B-4 marine group
AD-105_D22_Cp_8.1_bact_LSW_2000m_NA_all	Bacteria	Verrucomicrobia	Arctic97B-4 marine group
AD-105_P06_Cp_8.6_bact_LSW_2000m_NA_all	Bacteria	Verrucomicrobia	Arctic97B-4 marine group
AD-107_C14_Cp_12.5_bact_LSW_2000m_NA_all	Bacteria	Verrucomicrobia	Arctic97B-4 marine group
AD-107_E11_Cp_9.1_bact_LSW_2000m_NA_all	Bacteria	Verrucomicrobia	Arctic97B-4 marine group
AD-107_M19_Cp_7.5_bact_LSW_2000m_NA_all	Bacteria	Verrucomicrobia	Arctic97B-4 marine group
AD-107_N21_Cp_9.9_bact_LSW_2000m_NA_all	Bacteria	Verrucomicrobia	Arctic97B-4 marine group
AD-107_N22_Cp_8.7_bact_LSW_2000m_NA_all	Bacteria	Verrucomicrobia	Arctic97B-4 marine group
AD-113_O03_Cp_12.2_bact_CDW_4000m_SI_all	Bacteria	Verrucomicrobia	Arctic97B-4 marine group
AD-117_A03_Cp_8.2_bact_RSIW_500m_RS_all	Bacteria	Verrucomicrobia	Arctic97B-4 marine group
AD-129_D02_Cp_13.6_bact_NACW_300m_NA_all	Bacteria	Verrucomicrobia	Arctic97B-4 marine group
AD-129_G19_Cp_11.0_bact_NACW_300m_NA_all	Bacteria	Verrucomicrobia	Arctic97B-4 marine group
AD-150_C05_Cp_13.2_bact_AAIW_1140m_SI_all	Bacteria	Verrucomicrobia	Arctic97B-4 marine group
AD-150_J02_Cp_9.9_bact_AAIW_1140m_SI_all	Bacteria	Verrucomicrobia	Arctic97B-4 marine group
AD-150_O22_Cp_9.7_bact_AAIW_1140m_SI_all	Bacteria	Verrucomicrobia	Arctic97B-4 marine group
AD-261_P16_Cp_11.7_bact_NADW_3200m_NA_all	Bacteria	Verrucomicrobia	Arctic97B-4 marine group
AD-265_E10_Cp_6.7_bact_NSDW_1750m_NA_all	Bacteria	Verrucomicrobia	Arctic97B-4 marine group
AD-105_O14_Cp_12.4_bact_LSW_2000m_NA_all	Bacteria	Verrucomicrobia	Opitutae
AD-265_D06_Cp_8.6_bact_NSDW_1750m_NA_all	Bacteria	Verrucomicrobia	Opitutae	MB11C04 marine group
AD-265_D22_Cp_14.3_bact_NSDW_1750m_NA_all	Bacteria	Actinobacteria	Actinobacteria (class)	Corynebacteriales	Mycobacteriaceae	Mycobacterium
AD-105_C06_Cp_6.8_bact_LSW_2000m_NA_all	Bacteria	Bacteroidetes	Cytophagia	Cytophagales	Flammeovirgaceae	Marinoscillum
AD-107_N13_Cp_7.1_bact_LSW_2000m_NA_all	Bacteria	Bacteroidetes	Cytophagia	Cytophagales	Flammeovirgaceae	Marinoscillum
AD-107_G05_Cp_6.2_bact_LSW_2000m_NA_all	Bacteria	Bacteroidetes	Flavobacteria	Flavobacteriales	NS9 marine group
AD-131_E21_Cp_6.1_bact_OMZ_750m_NA_all	Bacteria	Bacteroidetes	Flavobacteria	Flavobacteriales	NS9 marine group
AD-263_L14_Cp_5.0_bact_LSW_1750m_NA_all	Bacteria	Bacteroidetes	Flavobacteria	Flavobacteriales	NS9 marine group
AD-107_I13_Cp_5.2_bact_LSW_2000m_NA_all	Bacteria	Bacteroidetes	Flavobacteria	Flavobacteriales	Flavobacteriaceae	Tenacibaculum
AD-150_J11_Cp_6.2_bact_AAIW_1140m_SI_all	Bacteria	Bacteroidetes	Flavobacteria	Flavobacteriales	Flavobacteriaceae	Leeuwenhoekiella
AD-150_L23_Cp_6.9_bact_AAIW_1140m_SI_all	Bacteria	Bacteroidetes	Flavobacteria	Flavobacteriales	Flavobacteriaceae	Leeuwenhoekiella
AD-259_P07_Cp_8.2_bact_AABW_5000m_NA_all	Bacteria	Bacteroidetes	Flavobacteria	Flavobacteriales	Flavobacteriaceae	Leeuwenhoekiella	Leeuwenhoekiella marinoflava
AD-129_L23_Cp_5.5_bact_NACW_300m_NA_all	Bacteria	Bacteroidetes	Flavobacteria	Flavobacteriales	Flavobacteriaceae	NS5 marine group
AD-129_P05_Cp_7.9_bact_NACW_300m_NA_all	Bacteria	Cyanobacteria	Cyanobacteria (class)	ML635J-21
AD-263_G02_Cp_5.2_bact_LSW_1750m_NA_all	Bacteria	Cyanobacteria	Cyanobacteria (class)	Synechococcales	Synechococcaceae	Synechococcus Cluster 5
AD-131_G23_Cp_12.0_bact_OMZ_750m_NA_all	Bacteria	Chloroflexi	Chloroflexi Subdivision 8 - TK10
AD-261_D09_Cp_11.0_bact_NADW_3200m_NA_all	Bacteria	Chloroflexi	Anaerolineae
AD-103_D04_Cp_11.7_bact_LDW_3100m_NA_all	Bacteria	Chloroflexi	Chloroflexi Subdivision 5 - SAR202 clade
AD-103_I20_Cp_13.5_bact_LDW_3100m_NA_all	Bacteria	Chloroflexi	Chloroflexi Subdivision 5 - SAR202 clade
AD-105_K15_Cp_12.0_bact_LSW_2000m_NA_all	Bacteria	Chloroflexi	Chloroflexi Subdivision 5 - SAR202 clade
AD-105_L18_Cp_12.4_bact_LSW_2000m_NA_all	Bacteria	Chloroflexi	Chloroflexi Subdivision 5 - SAR202 clade
AD-105_N11_Cp_10.9_bact_LSW_2000m_NA_all	Bacteria	Chloroflexi	Chloroflexi Subdivision 5 - SAR202 clade
AD-107_E15_Cp_7.0_bact_LSW_2000m_NA_all	Bacteria	Chloroflexi	Chloroflexi Subdivision 5 - SAR202 clade
AD-107_J11_Cp_11.8_bact_LSW_2000m_NA_all	Bacteria	Chloroflexi	Chloroflexi Subdivision 5 - SAR202 clade
AD-113_A10_Cp_13.2_bact_CDW_4000m_SI_all	Bacteria	Chloroflexi	Chloroflexi Subdivision 5 - SAR202 clade
AD-113_L06_Cp_12.2_bact_CDW_4000m_SI_all	Bacteria	Chloroflexi	Chloroflexi Subdivision 5 - SAR202 clade
AD-131_F13_Cp_7.5_bact_OMZ_750m_NA_all	Bacteria	Chloroflexi	Chloroflexi Subdivision 5 - SAR202 clade
AD-131_I11_Cp_8.1_bact_OMZ_750m_NA_all	Bacteria	Chloroflexi	Chloroflexi Subdivision 5 - SAR202 clade
AD-150_I16_Cp_13.0_bact_AAIW_1140m_SI_all	Bacteria	Chloroflexi	Chloroflexi Subdivision 5 - SAR202 clade
AD-150_P07_Cp_8.6_bact_AAIW_1140m_SI_all	Bacteria	Chloroflexi	Chloroflexi Subdivision 5 - SAR202 clade
AD-150_P22_Cp_10.6_bact_AAIW_1140m_SI_all	Bacteria	Chloroflexi	Chloroflexi Subdivision 5 - SAR202 clade
AD-259_A22_Cp_10.2_bact_AABW_5000m_NA_all	Bacteria	Chloroflexi	Chloroflexi Subdivision 5 - SAR202 clade
AD-259_B04_Cp_7.7_bact_AABW_5000m_NA_all	Bacteria	Chloroflexi	Chloroflexi Subdivision 5 - SAR202 clade
AD-259_E09_Cp_11.5_bact_AABW_5000m_NA_all	Bacteria	Chloroflexi	Chloroflexi Subdivision 5 - SAR202 clade
AD-259_K07_Cp_11.9_bact_AABW_5000m_NA_all	Bacteria	Chloroflexi	Chloroflexi Subdivision 5 - SAR202 clade
AD-259_K09_Cp_10.5_bact_AABW_5000m_NA_all	Bacteria	Chloroflexi	Chloroflexi Subdivision 5 - SAR202 clade
AD-259_O06_Cp_11.7_bact_AABW_5000m_NA_all	Bacteria	Chloroflexi	Chloroflexi Subdivision 5 - SAR202 clade
AD-259_O10_Cp_12.6_bact_AABW_5000m_NA_all	Bacteria	Chloroflexi	Chloroflexi Subdivision 5 - SAR202 clade
AD-261_G03_Cp_5.9_bact_NADW_3200m_NA_all	Bacteria	Chloroflexi	Chloroflexi Subdivision 5 - SAR202 clade
AD-261_L05_Cp_12.4_bact_NADW_3200m_NA_all	Bacteria	Chloroflexi	Chloroflexi Subdivision 5 - SAR202 clade
AD-261_N20_Cp_13.1_bact_NADW_3200m_NA_all	Bacteria	Chloroflexi	Chloroflexi Subdivision 5 - SAR202 clade
AD-261_O11_Cp_12.0_bact_NADW_3200m_NA_all	Bacteria	Chloroflexi	Chloroflexi Subdivision 5 - SAR202 clade
AD-263_A14_Cp_6.0_bact_LSW_1750m_NA_all	Bacteria	Chloroflexi	Chloroflexi Subdivision 5 - SAR202 clade
AD-263_B05_Cp_10.0_bact_LSW_1750m_NA_all	Bacteria	Chloroflexi	Chloroflexi Subdivision 5 - SAR202 clade
AD-263_B06_Cp_10.5_bact_LSW_1750m_NA_all	Bacteria	Chloroflexi	Chloroflexi Subdivision 5 - SAR202 clade
AD-263_B14_Cp_9.0_bact_LSW_1750m_NA_all	Bacteria	Chloroflexi	Chloroflexi Subdivision 5 - SAR202 clade
AD-263_D13_Cp_6.4_bact_LSW_1750m_NA_all	Bacteria	Chloroflexi	Chloroflexi Subdivision 5 - SAR202 clade
AD-263_G14_Cp_7.5_bact_LSW_1750m_NA_all	Bacteria	Chloroflexi	Chloroflexi Subdivision 5 - SAR202 clade
AD-263_I10_Cp_6.2_bact_LSW_1750m_NA_all	Bacteria	Chloroflexi	Chloroflexi Subdivision 5 - SAR202 clade
AD-263_K03_Cp_6.1_bact_LSW_1750m_NA_all	Bacteria	Chloroflexi	Chloroflexi Subdivision 5 - SAR202 clade
AD-263_K19_Cp_9.7_bact_LSW_1750m_NA_all	Bacteria	Chloroflexi	Chloroflexi Subdivision 5 - SAR202 clade
AD-265_A18_Cp_13.5_bact_NSDW_1750m_NA_all	Bacteria	Chloroflexi	Chloroflexi Subdivision 5 - SAR202 clade
AD-263_N22_Cp_15.6_bact_LSW_1750m_NA_all	Bacteria	Planctomycetes	OM190
AD-103_A13_Cp_9.6_bact_LDW_3100m_NA_all	Bacteria	Planctomycetes	Phycisphaerae	Phycisphaerales	Phycisphaeraceae
AD-105_F07_Cp_11.5_bact_LSW_2000m_NA_all	Bacteria	Planctomycetes	Phycisphaerae	Phycisphaerales	Phycisphaeraceae
AD-113_C09_Cp_12.2_bact_CDW_4000m_SI_all	Bacteria	Planctomycetes	Phycisphaerae	Phycisphaerales	Phycisphaeraceae
AD-117_F11_Cp_8.8_bact_RSIW_500m_RS_all	Bacteria	Planctomycetes	Phycisphaerae	Phycisphaerales	Phycisphaeraceae
AD-129_K02_Cp_10.6_bact_NACW_300m_NA_all	Bacteria	Planctomycetes	Phycisphaerae	Phycisphaerales	Phycisphaeraceae
AD-259_F10_Cp_12.6_bact_AABW_5000m_NA_all	Bacteria	Planctomycetes	Phycisphaerae	Phycisphaerales	Phycisphaeraceae
AD-113_K13_Cp_7.0_bact_CDW_4000m_SI_all	Bacteria	Planctomycetes	Phycisphaerae	Unknown Phycisphaerae order
AD-103_O05_Cp_11.0_bact_LDW_3100m_NA_all	Bacteria	Planctomycetes	Planctomycetacia	Planctomycetales	Planctomycetaceae
AD-105_G22_Cp_11.1_bact_LSW_2000m_NA_all	Bacteria	Planctomycetes	Planctomycetacia	Planctomycetales	Unknown Planctomycetales family
AD-107_I21_Cp_11.1_bact_LSW_2000m_NA_all	Bacteria	Planctomycetes	Planctomycetacia	Planctomycetales	Unknown Planctomycetales family
AD-150_M03_Cp_10.0_bact_AAIW_1140m_SI_all	Bacteria	Acidobacteria	Acidobacteria (class)	Acidobacteria group 11
AD-105_K23_Cp_13.1_bact_LSW_2000m_NA_all	Bacteria	Acidobacteria	Acidobacteria (class)	Acidobacteria group 21 (BPC102)
AD-107_E18_Cp_9.1_bact_LSW_2000m_NA_all	Bacteria	Acidobacteria	Acidobacteria (class)	Acidobacteria group 21 (BPC102)
AD-113_L19_Cp_11.0_bact_CDW_4000m_SI_all	Bacteria	Acidobacteria	Acidobacteria (class)	Acidobacteria group 21 (BPC102)
AD-131_O13_Cp_8.8_bact_OMZ_750m_NA_all	Bacteria	Acidobacteria	Acidobacteria (class)	Acidobacteria group 21 (BPC102)
AD-105_C03_Cp_9.7_bact_LSW_2000m_NA_all	Bacteria	Acidobacteria	Acidobacteria (class)	Acidobacteria group 6 (DA023)
AD-107_B18_Cp_11.3_bact_LSW_2000m_NA_all	Bacteria	Acidobacteria	Acidobacteria (class)	Acidobacteria group 6 (DA023)
AD-131_J09_Cp_11.1_bact_OMZ_750m_NA_all	Bacteria	Acidobacteria	Acidobacteria (class)	Acidobacteria group 6 (DA023)
AD-150_J13_Cp_12.2_bact_AAIW_1140m_SI_all	Bacteria	Acidobacteria	Acidobacteria (class)	Acidobacteria group 6 (DA023)
AD-261_K21_Cp_15.1_bact_NADW_3200m_NA_all	Bacteria	Acidobacteria	Acidobacteria (class)	Acidobacteria group 6 (DA023)
AD-263_O20_Cp_5.9_bact_LSW_1750m_NA_all	Bacteria	Acidobacteria	Acidobacteria (class)	Acidobacteria group 6 (DA023)
AD-150_N04_Cp_10.7_bact_AAIW_1140m_SI_all	Bacteria	Proteobacteria	JTB23
AD-103_K09_Cp_6.2_bact_LDW_3100m_NA_all	Bacteria	Proteobacteria	Deltaproteobacteria	Nitrospinaceae order incertae sedis	Nitrospinaceae	Nitrospina
AD-107_M11_Cp_6.7_bact_LSW_2000m_NA_all	Bacteria	Proteobacteria	Deltaproteobacteria	Nitrospinaceae order incertae sedis	Nitrospinaceae	Nitrospina
AD-113_L21_Cp_7.0_bact_CDW_4000m_SI_all	Bacteria	Proteobacteria	Deltaproteobacteria	Nitrospinaceae order incertae sedis	Nitrospinaceae	Nitrospina
AD-117_L17_Cp_7.9_bact_RSIW_500m_RS_all	Bacteria	Proteobacteria	Deltaproteobacteria	Nitrospinaceae order incertae sedis	Nitrospinaceae	Nitrospina
AD-129_B19_Cp_9.1_bact_NACW_300m_NA_all	Bacteria	Proteobacteria	Deltaproteobacteria	Nitrospinaceae order incertae sedis	Nitrospinaceae	Nitrospina
AD-129_D03_Cp_8.2_bact_NACW_300m_NA_all	Bacteria	Proteobacteria	Deltaproteobacteria	Nitrospinaceae order incertae sedis	Nitrospinaceae	Nitrospina
AD-129_J16_Cp_9.9_bact_NACW_300m_NA_all	Bacteria	Proteobacteria	Deltaproteobacteria	Nitrospinaceae order incertae sedis	Nitrospinaceae	Nitrospina
AD-129_P07_Cp_6.5_bact_NACW_300m_NA_all	Bacteria	Proteobacteria	Deltaproteobacteria	Nitrospinaceae order incertae sedis	Nitrospinaceae	Nitrospina
AD-129_P22_Cp_6.3_bact_NACW_300m_NA_all	Bacteria	Proteobacteria	Deltaproteobacteria	Nitrospinaceae order incertae sedis	Nitrospinaceae	Nitrospina
AD-131_J23_Cp_5.5_bact_OMZ_750m_NA_all	Bacteria	Proteobacteria	Deltaproteobacteria	Nitrospinaceae order incertae sedis	Nitrospinaceae	Nitrospina
AD-150_N13_Cp_10.0_bact_AAIW_1140m_SI_all	Bacteria	Proteobacteria	Deltaproteobacteria	Nitrospinaceae order incertae sedis	Nitrospinaceae	Nitrospina
AD-150_O19_Cp_6.7_bact_AAIW_1140m_SI_all	Bacteria	Proteobacteria	Deltaproteobacteria	Nitrospinaceae order incertae sedis	Nitrospinaceae	Nitrospina
AD-259_G04_Cp_8.4_bact_AABW_5000m_NA_all	Bacteria	Proteobacteria	Deltaproteobacteria	Nitrospinaceae order incertae sedis	Nitrospinaceae	Nitrospina
AD-259_M10_Cp_5.8_bact_AABW_5000m_NA_all	Bacteria	Proteobacteria	Deltaproteobacteria	Nitrospinaceae order incertae sedis	Nitrospinaceae	Nitrospina
AD-261_B18_Cp_5.3_bact_NADW_3200m_NA_all	Bacteria	Proteobacteria	Deltaproteobacteria	Nitrospinaceae order incertae sedis	Nitrospinaceae	Nitrospina
AD-261_E20_Cp_6.3_bact_NADW_3200m_NA_all	Bacteria	Proteobacteria	Deltaproteobacteria	Nitrospinaceae order incertae sedis	Nitrospinaceae	Nitrospina
AD-263_C11_Cp_4.7_bact_LSW_1750m_NA_all	Bacteria	Proteobacteria	Deltaproteobacteria	Nitrospinaceae order incertae sedis	Nitrospinaceae	Nitrospina
AD-263_D10_Cp_7.0_bact_LSW_1750m_NA_all	Bacteria	Proteobacteria	Deltaproteobacteria	Nitrospinaceae order incertae sedis	Nitrospinaceae	Nitrospina
AD-263_G09_Cp_4.7_bact_LSW_1750m_NA_all	Bacteria	Proteobacteria	Deltaproteobacteria	Nitrospinaceae order incertae sedis	Nitrospinaceae	Nitrospina
AD-107_C05_Cp_9.2_bact_LSW_2000m_NA_all	Bacteria	Proteobacteria	Deltaproteobacteria	Desulfurellales	Unknown Desulfurellales family
AD-261_O04_Cp_15.1_bact_NADW_3200m_NA_all	Bacteria	Proteobacteria	Deltaproteobacteria	Desulfurellales	Unknown Desulfurellales family
AD-113_B17_Cp_12.2_bact_CDW_4000m_SI_all	Bacteria	Proteobacteria	Deltaproteobacteria	Desulfuromonadales	Unknown Desulfuromonadales family
AD-103_A07_Cp_7.1_bact_LDW_3100m_NA_all	Bacteria	Proteobacteria	Deltaproteobacteria	SAR324 clade(Marine group B)
AD-103_I10_Cp_10.2_bact_LDW_3100m_NA_all	Bacteria	Proteobacteria	Deltaproteobacteria	SAR324 clade(Marine group B)
AD-103_K15_Cp_9.0_bact_LDW_3100m_NA_all	Bacteria	Proteobacteria	Deltaproteobacteria	SAR324 clade(Marine group B)
AD-103_L15_Cp_8.2_bact_LDW_3100m_NA_all	Bacteria	Proteobacteria	Deltaproteobacteria	SAR324 clade(Marine group B)
AD-105_B04_Cp_6.0_bact_LSW_2000m_NA_all	Bacteria	Proteobacteria	Deltaproteobacteria	SAR324 clade(Marine group B)
AD-105_G19_Cp_8.0_bact_LSW_2000m_NA_all	Bacteria	Proteobacteria	Deltaproteobacteria	SAR324 clade(Marine group B)
AD-105_I09_Cp_8.0_bact_LSW_2000m_NA_all	Bacteria	Proteobacteria	Deltaproteobacteria	SAR324 clade(Marine group B)
AD-105_I23_Cp_5.6_bact_LSW_2000m_NA_all	Bacteria	Proteobacteria	Deltaproteobacteria	SAR324 clade(Marine group B)
AD-105_K11_Cp_6.0_bact_LSW_2000m_NA_all	Bacteria	Proteobacteria	Deltaproteobacteria	SAR324 clade(Marine group B)
AD-105_L11_Cp_6.6_bact_LSW_2000m_NA_all	Bacteria	Proteobacteria	Deltaproteobacteria	SAR324 clade(Marine group B)
AD-105_N18_Cp_6.2_bact_LSW_2000m_NA_all	Bacteria	Proteobacteria	Deltaproteobacteria	SAR324 clade(Marine group B)
AD-107_C03_Cp_7.0_bact_LSW_2000m_NA_all	Bacteria	Proteobacteria	Deltaproteobacteria	SAR324 clade(Marine group B)
AD-107_E02_Cp_5.2_bact_LSW_2000m_NA_all	Bacteria	Proteobacteria	Deltaproteobacteria	SAR324 clade(Marine group B)
AD-107_L13_Cp_6.6_bact_LSW_2000m_NA_all	Bacteria	Proteobacteria	Deltaproteobacteria	SAR324 clade(Marine group B)
AD-113_A22_Cp_8.2_bact_CDW_4000m_SI_all	Bacteria	Proteobacteria	Deltaproteobacteria	SAR324 clade(Marine group B)
AD-113_K11_Cp_7.4_bact_CDW_4000m_SI_all	Bacteria	Proteobacteria	Deltaproteobacteria	SAR324 clade(Marine group B)
AD-117_C10_Cp_11.6_bact_RSIW_500m_RS_all	Bacteria	Proteobacteria	Deltaproteobacteria	SAR324 clade(Marine group B)
AD-117_M08_Cp_9.1_bact_RSIW_500m_RS_all	Bacteria	Proteobacteria	Deltaproteobacteria	SAR324 clade(Marine group B)
AD-117_P23_Cp_7.6_bact_RSIW_500m_RS_all	Bacteria	Proteobacteria	Deltaproteobacteria	SAR324 clade(Marine group B)
AD-129_D15_Cp_9.2_bact_NACW_300m_NA_all	Bacteria	Proteobacteria	Deltaproteobacteria	SAR324 clade(Marine group B)
AD-129_I09_Cp_6.8_bact_NACW_300m_NA_all	Bacteria	Proteobacteria	Deltaproteobacteria	SAR324 clade(Marine group B)
AD-129_I18_Cp_7.5_bact_NACW_300m_NA_all	Bacteria	Proteobacteria	Deltaproteobacteria	SAR324 clade(Marine group B)
AD-129_P04_Cp_6.9_bact_NACW_300m_NA_all	Bacteria	Proteobacteria	Deltaproteobacteria	SAR324 clade(Marine group B)
AD-131_A07_Cp_6.2_bact_OMZ_750m_NA_all	Bacteria	Proteobacteria	Deltaproteobacteria	SAR324 clade(Marine group B)
AD-131_B06_Cp_9.9_bact_OMZ_750m_NA_all	Bacteria	Proteobacteria	Deltaproteobacteria	SAR324 clade(Marine group B)
AD-131_C18_Cp_8.7_bact_OMZ_750m_NA_all	Bacteria	Proteobacteria	Deltaproteobacteria	SAR324 clade(Marine group B)
AD-131_D23_Cp_7.5_bact_OMZ_750m_NA_all	Bacteria	Proteobacteria	Deltaproteobacteria	SAR324 clade(Marine group B)
AD-150_C14_Cp_8.3_bact_AAIW_1140m_SI_all	Bacteria	Proteobacteria	Deltaproteobacteria	SAR324 clade(Marine group B)
AD-150_I22_Cp_7.5_bact_AAIW_1140m_SI_all	Bacteria	Proteobacteria	Deltaproteobacteria	SAR324 clade(Marine group B)
AD-150_J07_Cp_10.0_bact_AAIW_1140m_SI_all	Bacteria	Proteobacteria	Deltaproteobacteria	SAR324 clade(Marine group B)
AD-150_K05_Cp_9.8_bact_AAIW_1140m_SI_all	Bacteria	Proteobacteria	Deltaproteobacteria	SAR324 clade(Marine group B)
AD-150_L09_Cp_9.8_bact_AAIW_1140m_SI_all	Bacteria	Proteobacteria	Deltaproteobacteria	SAR324 clade(Marine group B)
AD-150_N11_Cp_10.3_bact_AAIW_1140m_SI_all	Bacteria	Proteobacteria	Deltaproteobacteria	SAR324 clade(Marine group B)
AD-150_O23_Cp_8.3_bact_AAIW_1140m_SI_all	Bacteria	Proteobacteria	Deltaproteobacteria	SAR324 clade(Marine group B)
AD-259_D06_Cp_6.5_bact_AABW_5000m_NA_all	Bacteria	Proteobacteria	Deltaproteobacteria	SAR324 clade(Marine group B)
AD-259_D11_Cp_7.0_bact_AABW_5000m_NA_all	Bacteria	Proteobacteria	Deltaproteobacteria	SAR324 clade(Marine group B)
AD-259_G02_Cp_5.2_bact_AABW_5000m_NA_all	Bacteria	Proteobacteria	Deltaproteobacteria	SAR324 clade(Marine group B)
AD-259_J21_Cp_6.2_bact_AABW_5000m_NA_all	Bacteria	Proteobacteria	Deltaproteobacteria	SAR324 clade(Marine group B)
AD-259_K04_Cp_6.4_bact_AABW_5000m_NA_all	Bacteria	Proteobacteria	Deltaproteobacteria	SAR324 clade(Marine group B)
AD-259_L02_Cp_8.3_bact_AABW_5000m_NA_all	Bacteria	Proteobacteria	Deltaproteobacteria	SAR324 clade(Marine group B)
AD-261_M21_Cp_7.2_bact_NADW_3200m_NA_all	Bacteria	Proteobacteria	Deltaproteobacteria	SAR324 clade(Marine group B)
AD-263_O03_Cp_4.7_bact_LSW_1750m_NA_all	Bacteria	Proteobacteria	Deltaproteobacteria	SAR324 clade(Marine group B)
AD-263_P06_Cp_4.6_bact_LSW_1750m_NA_all	Bacteria	Proteobacteria	Deltaproteobacteria	SAR324 clade(Marine group B)
AD-265_A15_Cp_5.9_bact_NSDW_1750m_NA_all	Bacteria	Proteobacteria	Deltaproteobacteria	SAR324 clade(Marine group B)
AD-265_E16_Cp_9.3_bact_NSDW_1750m_NA_all	Bacteria	Proteobacteria	Deltaproteobacteria	SAR324 clade(Marine group B)
AD-263_B17_Cp_8.1_bact_LSW_1750m_NA_all	Bacteria	Proteobacteria	Deltaproteobacteria	Myxococcales	Nannocystineae
AD-261_P23_Cp_6.4_bact_NADW_3200m_NA_all	Bacteria	Proteobacteria	Deltaproteobacteria	Myxococcales	Unknown Myxococcales family
AD-261_D02_Cp_10.8_bact_NADW_3200m_NA_all	Bacteria	Proteobacteria	Deltaproteobacteria	Unknown Deltaproteobacteria order
AD-129_D20_Cp_5.8_bact_NACW_300m_NA_all	Bacteria	Proteobacteria	Betaproteobacteria	Methylophilales	Methylophilaceae	OM43 clade
AD-103_A03_Cp_12.6_bact_LDW_3100m_NA_all	Bacteria	Proteobacteria	Alphaproteobacteria	MNG3
AD-105_A20_Cp_7.8_bact_LSW_2000m_NA_all	Bacteria	Proteobacteria	Alphaproteobacteria	Rickettsiales	S25-593
AD-117_I19_Cp_7.4_bact_RSIW_500m_RS_all	Bacteria	Proteobacteria	Alphaproteobacteria	Rickettsiales	S25-593
AD-259_K11_Cp_5.6_bact_AABW_5000m_NA_all	Bacteria	Proteobacteria	Alphaproteobacteria	Rickettsiales	S25-593
AD-103_G21_Cp_11.2_bact_LDW_3100m_NA_all	Bacteria	Proteobacteria	Alphaproteobacteria	Rhodobacterales	Rhodobacteraceae
AD-265_B05_Cp_13.2_bact_NSDW_1750m_NA_all	Bacteria	Proteobacteria	Alphaproteobacteria	Rhodobacterales	Rhodobacteraceae	Sulfitobacter
AD-103_E02_Cp_7.8_bact_LDW_3100m_NA_all	Bacteria	Proteobacteria	Alphaproteobacteria	Rhodospirillales	Rhodospirillaceae
AD-103_J08_Cp_11.8_bact_LDW_3100m_NA_all	Bacteria	Proteobacteria	Alphaproteobacteria	Rhodospirillales	Rhodospirillaceae
AD-107_I23_Cp_13.7_bact_LSW_2000m_NA_all	Bacteria	Proteobacteria	Alphaproteobacteria	Rhodospirillales	Rhodospirillaceae
AD-117_F20_Cp_11.8_bact_RSIW_500m_RS_all	Bacteria	Proteobacteria	Alphaproteobacteria	Rhodospirillales	Rhodospirillaceae
AD-129_D21_Cp_8.0_bact_NACW_300m_NA_all	Bacteria	Proteobacteria	Alphaproteobacteria	Rhodospirillales	Rhodospirillaceae
AD-129_G21_Cp_12.1_bact_NACW_300m_NA_all	Bacteria	Proteobacteria	Alphaproteobacteria	Rhodospirillales	Rhodospirillaceae
AD-129_I21_Cp_8.9_bact_NACW_300m_NA_all	Bacteria	Proteobacteria	Alphaproteobacteria	Rhodospirillales	Rhodospirillaceae
AD-150_A16_Cp_10.8_bact_AAIW_1140m_SI_all	Bacteria	Proteobacteria	Alphaproteobacteria	Rhodospirillales	Rhodospirillaceae
AD-259_E05_Cp_12.4_bact_AABW_5000m_NA_all	Bacteria	Proteobacteria	Alphaproteobacteria	Rhodospirillales	Rhodospirillaceae
AD-259_O18_Cp_12.3_bact_AABW_5000m_NA_all	Bacteria	Proteobacteria	Alphaproteobacteria	Rhodospirillales	Rhodospirillaceae
AD-261_G10_Cp_10.8_bact_NADW_3200m_NA_all	Bacteria	Proteobacteria	Alphaproteobacteria	Rhodospirillales	Rhodospirillaceae
AD-261_L16_Cp_11.6_bact_NADW_3200m_NA_all	Bacteria	Proteobacteria	Alphaproteobacteria	Rhodospirillales	Rhodospirillaceae
AD-265_E02_Cp_7.9_bact_NSDW_1750m_NA_all	Bacteria	Proteobacteria	Alphaproteobacteria	Rhodospirillales	Rhodospirillaceae
AD-265_E17_Cp_10.2_bact_NSDW_1750m_NA_all	Bacteria	Proteobacteria	Alphaproteobacteria	Rhodospirillales	Rhodospirillaceae
AD-129_F08_Cp_9.2_bact_NACW_300m_NA_all	Bacteria	Proteobacteria	Alphaproteobacteria	Rhodospirillales	Rhodospirillaceae	OM75 clade
AD-129_G18_Cp_5.6_bact_NACW_300m_NA_all	Bacteria	Proteobacteria	Alphaproteobacteria	Rhodospirillales	Rhodospirillaceae	AEGEAN-169 marine group
AD-129_N18_Cp_6.0_bact_NACW_300m_NA_all	Bacteria	Proteobacteria	Alphaproteobacteria	Rhodospirillales	Rhodospirillaceae	AEGEAN-169 marine group
AD-150_J05_Cp_10.1_bact_AAIW_1140m_SI_all	Bacteria	Proteobacteria	Alphaproteobacteria	Rhodospirillales	Rhodospirillaceae	AEGEAN-169 marine group
AD-103_N18_Cp_11.2_bact_LDW_3100m_NA_all	Bacteria	Proteobacteria	Alphaproteobacteria	Rhodospirillales	Rhodospirillaceae	Defluviicoccus
AD-263_I09_Cp_7.9_bact_LSW_1750m_NA_all	Bacteria	Proteobacteria	Alphaproteobacteria	Rhodospirillales	Rhodospirillaceae	Unknown Rhodospirillaceae genus
AD-117_B17_Cp_8.6_bact_RSIW_500m_RS_all	Bacteria	Proteobacteria	Alphaproteobacteria	Rhodospirillales	Unknown Rhodospirillales family
AD-107_F08_Cp_6.1_bact_LSW_2000m_NA_all	Bacteria	Proteobacteria	Alphaproteobacteria	SAR11 clade
AD-107_J03_Cp_7.7_bact_LSW_2000m_NA_all	Bacteria	Proteobacteria	Alphaproteobacteria	SAR11 clade
AD-117_G05_Cp_8.4_bact_RSIW_500m_RS_all	Bacteria	Proteobacteria	Alphaproteobacteria	SAR11 clade
AD-117_N08_Cp_6.2_bact_RSIW_500m_RS_all	Bacteria	Proteobacteria	Alphaproteobacteria	SAR11 clade
AD-129_D14_Cp_8.2_bact_NACW_300m_NA_all	Bacteria	Proteobacteria	Alphaproteobacteria	SAR11 clade
AD-129_F19_Cp_5.3_bact_NACW_300m_NA_all	Bacteria	Proteobacteria	Alphaproteobacteria	SAR11 clade
AD-129_G23_Cp_5.2_bact_NACW_300m_NA_all	Bacteria	Proteobacteria	Alphaproteobacteria	SAR11 clade
AD-129_M06_Cp_9.4_bact_NACW_300m_NA_all	Bacteria	Proteobacteria	Alphaproteobacteria	SAR11 clade
AD-129_P18_Cp_6.2_bact_NACW_300m_NA_all	Bacteria	Proteobacteria	Alphaproteobacteria	SAR11 clade
AD-131_A03_Cp_11.0_bact_OMZ_750m_NA_all	Bacteria	Proteobacteria	Alphaproteobacteria	SAR11 clade
AD-131_G09_Cp_7.1_bact_OMZ_750m_NA_all	Bacteria	Proteobacteria	Alphaproteobacteria	SAR11 clade
AD-131_G22_Cp_7.2_bact_OMZ_750m_NA_all	Bacteria	Proteobacteria	Alphaproteobacteria	SAR11 clade
AD-131_K15_Cp_6.2_bact_OMZ_750m_NA_all	Bacteria	Proteobacteria	Alphaproteobacteria	SAR11 clade
AD-259_F21_Cp_7.1_bact_AABW_5000m_NA_all	Bacteria	Proteobacteria	Alphaproteobacteria	SAR11 clade
AD-261_C22_Cp_5.0_bact_NADW_3200m_NA_all	Bacteria	Proteobacteria	Alphaproteobacteria	SAR11 clade
AD-263_L18_Cp_5.2_bact_LSW_1750m_NA_all	Bacteria	Proteobacteria	Alphaproteobacteria	SAR11 clade
AD-105_C15_Cp_7.0_bact_LSW_2000m_NA_all	Bacteria	Proteobacteria	Alphaproteobacteria	SAR11 clade	Deep 1
AD-105_F10_Cp_5.4_bact_LSW_2000m_NA_all	Bacteria	Proteobacteria	Alphaproteobacteria	SAR11 clade	Deep 1
AD-105_L04_Cp_5.4_bact_LSW_2000m_NA_all	Bacteria	Proteobacteria	Alphaproteobacteria	SAR11 clade	Deep 1
AD-105_M04_Cp_7.8_bact_LSW_2000m_NA_all	Bacteria	Proteobacteria	Alphaproteobacteria	SAR11 clade	Deep 1
AD-105_N09_Cp_6.0_bact_LSW_2000m_NA_all	Bacteria	Proteobacteria	Alphaproteobacteria	SAR11 clade	Deep 1
AD-107_J17_Cp_7.9_bact_LSW_2000m_NA_all	Bacteria	Proteobacteria	Alphaproteobacteria	SAR11 clade	Deep 1
AD-107_M21_Cp_7.7_bact_LSW_2000m_NA_all	Bacteria	Proteobacteria	Alphaproteobacteria	SAR11 clade	Deep 1
AD-113_E22_Cp_7.4_bact_CDW_4000m_SI_all	Bacteria	Proteobacteria	Alphaproteobacteria	SAR11 clade	Deep 1
AD-113_O07_Cp_5.9_bact_CDW_4000m_SI_all	Bacteria	Proteobacteria	Alphaproteobacteria	SAR11 clade	Deep 1
AD-117_A22_Cp_6.7_bact_RSIW_500m_RS_all	Bacteria	Proteobacteria	Alphaproteobacteria	SAR11 clade	Deep 1
AD-117_C07_Cp_9.1_bact_RSIW_500m_RS_all	Bacteria	Proteobacteria	Alphaproteobacteria	SAR11 clade	Deep 1
AD-117_I02_Cp_7.0_bact_RSIW_500m_RS_all	Bacteria	Proteobacteria	Alphaproteobacteria	SAR11 clade	Deep 1
AD-117_N14_Cp_6.3_bact_RSIW_500m_RS_all	Bacteria	Proteobacteria	Alphaproteobacteria	SAR11 clade	Deep 1
AD-117_O02_Cp_8.1_bact_RSIW_500m_RS_all	Bacteria	Proteobacteria	Alphaproteobacteria	SAR11 clade	Deep 1
AD-117_O08_Cp_7.7_bact_RSIW_500m_RS_all	Bacteria	Proteobacteria	Alphaproteobacteria	SAR11 clade	Deep 1
AD-117_P22_Cp_5.8_bact_RSIW_500m_RS_all	Bacteria	Proteobacteria	Alphaproteobacteria	SAR11 clade	Deep 1
AD-129_C18_Cp_5.5_bact_NACW_300m_NA_all	Bacteria	Proteobacteria	Alphaproteobacteria	SAR11 clade	Deep 1
AD-259_A05_Cp_7.2_bact_AABW_5000m_NA_all	Bacteria	Proteobacteria	Alphaproteobacteria	SAR11 clade	Deep 1
AD-259_A06_Cp_5.1_bact_AABW_5000m_NA_all	Bacteria	Proteobacteria	Alphaproteobacteria	SAR11 clade	Deep 1
AD-259_A09_Cp_4.8_bact_AABW_5000m_NA_all	Bacteria	Proteobacteria	Alphaproteobacteria	SAR11 clade	Deep 1
AD-259_B09_Cp_8.2_bact_AABW_5000m_NA_all	Bacteria	Proteobacteria	Alphaproteobacteria	SAR11 clade	Deep 1
AD-259_F15_Cp_5.4_bact_AABW_5000m_NA_all	Bacteria	Proteobacteria	Alphaproteobacteria	SAR11 clade	Deep 1
AD-259_F19_Cp_6.4_bact_AABW_5000m_NA_all	Bacteria	Proteobacteria	Alphaproteobacteria	SAR11 clade	Deep 1
AD-259_I18_Cp_8.2_bact_AABW_5000m_NA_all	Bacteria	Proteobacteria	Alphaproteobacteria	SAR11 clade	Deep 1
AD-259_P19_Cp_6.6_bact_AABW_5000m_NA_all	Bacteria	Proteobacteria	Alphaproteobacteria	SAR11 clade	Deep 1
AD-261_F09_Cp_8.2_bact_NADW_3200m_NA_all	Bacteria	Proteobacteria	Alphaproteobacteria	SAR11 clade	Deep 1
AD-265_A05_Cp_4.2_bact_NSDW_1750m_NA_all	Bacteria	Proteobacteria	Alphaproteobacteria	SAR11 clade	Deep 1
AD-265_D09_Cp_4.6_bact_NSDW_1750m_NA_all	Bacteria	Proteobacteria	Alphaproteobacteria	SAR11 clade	Deep 1
AD-103_B11_Cp_6.2_bact_LDW_3100m_NA_all	Bacteria	Proteobacteria	Alphaproteobacteria	SAR11 clade	Surface 1
AD-103_M04_Cp_7.9_bact_LDW_3100m_NA_all	Bacteria	Proteobacteria	Alphaproteobacteria	SAR11 clade	Surface 1
AD-103_N04_Cp_9.7_bact_LDW_3100m_NA_all	Bacteria	Proteobacteria	Alphaproteobacteria	SAR11 clade	Surface 1
AD-103_N23_Cp_5.3_bact_LDW_3100m_NA_all	Bacteria	Proteobacteria	Alphaproteobacteria	SAR11 clade	Surface 1
AD-105_B05_Cp_6.0_bact_LSW_2000m_NA_all	Bacteria	Proteobacteria	Alphaproteobacteria	SAR11 clade	Surface 1
AD-105_F03_Cp_7.4_bact_LSW_2000m_NA_all	Bacteria	Proteobacteria	Alphaproteobacteria	SAR11 clade	Surface 1
AD-105_J19_Cp_8.4_bact_LSW_2000m_NA_all	Bacteria	Proteobacteria	Alphaproteobacteria	SAR11 clade	Surface 1
AD-105_P07_Cp_7.6_bact_LSW_2000m_NA_all	Bacteria	Proteobacteria	Alphaproteobacteria	SAR11 clade	Surface 1
AD-107_C08_Cp_7.8_bact_LSW_2000m_NA_all	Bacteria	Proteobacteria	Alphaproteobacteria	SAR11 clade	Surface 1
AD-107_D17_Cp_7.3_bact_LSW_2000m_NA_all	Bacteria	Proteobacteria	Alphaproteobacteria	SAR11 clade	Surface 1
AD-107_I02_Cp_5.4_bact_LSW_2000m_NA_all	Bacteria	Proteobacteria	Alphaproteobacteria	SAR11 clade	Surface 1
AD-107_J07_Cp_8.0_bact_LSW_2000m_NA_all	Bacteria	Proteobacteria	Alphaproteobacteria	SAR11 clade	Surface 1
AD-113_D04_Cp_7.2_bact_CDW_4000m_SI_all	Bacteria	Proteobacteria	Alphaproteobacteria	SAR11 clade	Surface 1
AD-113_N09_Cp_7.8_bact_CDW_4000m_SI_all	Bacteria	Proteobacteria	Alphaproteobacteria	SAR11 clade	Surface 1
AD-113_O14_Cp_8.1_bact_CDW_4000m_SI_all	Bacteria	Proteobacteria	Alphaproteobacteria	SAR11 clade	Surface 1
AD-117_C11_Cp_7.4_bact_RSIW_500m_RS_all	Bacteria	Proteobacteria	Alphaproteobacteria	SAR11 clade	Surface 1
AD-117_D11_Cp_8.6_bact_RSIW_500m_RS_all	Bacteria	Proteobacteria	Alphaproteobacteria	SAR11 clade	Surface 1
AD-117_E06_Cp_8.4_bact_RSIW_500m_RS_all	Bacteria	Proteobacteria	Alphaproteobacteria	SAR11 clade	Surface 1
AD-117_K07_Cp_5.5_bact_RSIW_500m_RS_all	Bacteria	Proteobacteria	Alphaproteobacteria	SAR11 clade	Surface 1
AD-117_K21_Cp_6.3_bact_RSIW_500m_RS_all	Bacteria	Proteobacteria	Alphaproteobacteria	SAR11 clade	Surface 1
AD-117_L11_Cp_8.2_bact_RSIW_500m_RS_all	Bacteria	Proteobacteria	Alphaproteobacteria	SAR11 clade	Surface 1
AD-117_M02_Cp_6.7_bact_RSIW_500m_RS_all	Bacteria	Proteobacteria	Alphaproteobacteria	SAR11 clade	Surface 1
AD-117_M17_Cp_6.0_bact_RSIW_500m_RS_all	Bacteria	Proteobacteria	Alphaproteobacteria	SAR11 clade	Surface 1
AD-129_E11_Cp_9.3_bact_NACW_300m_NA_all	Bacteria	Proteobacteria	Alphaproteobacteria	SAR11 clade	Surface 1
AD-129_E23_Cp_7.4_bact_NACW_300m_NA_all	Bacteria	Proteobacteria	Alphaproteobacteria	SAR11 clade	Surface 1
AD-129_G11_Cp_8.9_bact_NACW_300m_NA_all	Bacteria	Proteobacteria	Alphaproteobacteria	SAR11 clade	Surface 1
AD-129_J17_Cp_9.7_bact_NACW_300m_NA_all	Bacteria	Proteobacteria	Alphaproteobacteria	SAR11 clade	Surface 1
AD-129_L16_Cp_8.5_bact_NACW_300m_NA_all	Bacteria	Proteobacteria	Alphaproteobacteria	SAR11 clade	Surface 1
AD-129_M17_Cp_7.1_bact_NACW_300m_NA_all	Bacteria	Proteobacteria	Alphaproteobacteria	SAR11 clade	Surface 1
AD-129_N17_Cp_7.6_bact_NACW_300m_NA_all	Bacteria	Proteobacteria	Alphaproteobacteria	SAR11 clade	Surface 1
AD-131_D13_Cp_8.2_bact_OMZ_750m_NA_all	Bacteria	Proteobacteria	Alphaproteobacteria	SAR11 clade	Surface 1
AD-131_E10_Cp_7.9_bact_OMZ_750m_NA_all	Bacteria	Proteobacteria	Alphaproteobacteria	SAR11 clade	Surface 1
AD-131_E15_Cp_5.4_bact_OMZ_750m_NA_all	Bacteria	Proteobacteria	Alphaproteobacteria	SAR11 clade	Surface 1
AD-131_E23_Cp_5.3_bact_OMZ_750m_NA_all	Bacteria	Proteobacteria	Alphaproteobacteria	SAR11 clade	Surface 1
AD-131_F08_Cp_7.2_bact_OMZ_750m_NA_all	Bacteria	Proteobacteria	Alphaproteobacteria	SAR11 clade	Surface 1
AD-131_O16_Cp_7.2_bact_OMZ_750m_NA_all	Bacteria	Proteobacteria	Alphaproteobacteria	SAR11 clade	Surface 1
AD-150_F04_Cp_9.5_bact_AAIW_1140m_SI_all	Bacteria	Proteobacteria	Alphaproteobacteria	SAR11 clade	Surface 1
AD-150_P15_Cp_6.8_bact_AAIW_1140m_SI_all	Bacteria	Proteobacteria	Alphaproteobacteria	SAR11 clade	Surface 1
AD-259_B20_Cp_6.2_bact_AABW_5000m_NA_all	Bacteria	Proteobacteria	Alphaproteobacteria	SAR11 clade	Surface 1
AD-259_B23_Cp_4.8_bact_AABW_5000m_NA_all	Bacteria	Proteobacteria	Alphaproteobacteria	SAR11 clade	Surface 1
AD-259_K14_Cp_5.6_bact_AABW_5000m_NA_all	Bacteria	Proteobacteria	Alphaproteobacteria	SAR11 clade	Surface 1
AD-259_N09_Cp_5.1_bact_AABW_5000m_NA_all	Bacteria	Proteobacteria	Alphaproteobacteria	SAR11 clade	Surface 1
AD-261_A03_Cp_5.9_bact_NADW_3200m_NA_all	Bacteria	Proteobacteria	Alphaproteobacteria	SAR11 clade	Surface 1
AD-261_B22_Cp_5.2_bact_NADW_3200m_NA_all	Bacteria	Proteobacteria	Alphaproteobacteria	SAR11 clade	Surface 1
AD-261_F20_Cp_6.0_bact_NADW_3200m_NA_all	Bacteria	Proteobacteria	Alphaproteobacteria	SAR11 clade	Surface 1
AD-261_L07_Cp_10.5_bact_NADW_3200m_NA_all	Bacteria	Proteobacteria	Alphaproteobacteria	SAR11 clade	Surface 1
AD-261_O02_Cp_5.3_bact_NADW_3200m_NA_all	Bacteria	Proteobacteria	Alphaproteobacteria	SAR11 clade	Surface 1
AD-263_G06_Cp_5.5_bact_LSW_1750m_NA_all	Bacteria	Proteobacteria	Alphaproteobacteria	SAR11 clade	Surface 1
AD-265_B03_Cp_3.8_bact_NSDW_1750m_NA_all	Bacteria	Proteobacteria	Alphaproteobacteria	SAR11 clade	Surface 1
AD-265_D11_Cp_6.4_bact_NSDW_1750m_NA_all	Bacteria	Proteobacteria	Alphaproteobacteria	SAR11 clade	Surface 1
AD-150_B08_Cp_7.7_bact_AAIW_1140m_SI_all	Bacteria	Proteobacteria	Alphaproteobacteria	Unknown Alphaproteobacteria order
AD-263_G17_Cp_5.0_bact_LSW_1750m_NA_all	Bacteria	Proteobacteria	Gammaproteobacteria
AD-103_N05_Cp_11.9_bact_LDW_3100m_NA_all	Bacteria	Proteobacteria	Gammaproteobacteria	E01-9C-26 marine group
AD-105_I19_Cp_10.3_bact_LSW_2000m_NA_all	Bacteria	Proteobacteria	Gammaproteobacteria	E01-9C-26 marine group
AD-107_N18_Cp_11.9_bact_LSW_2000m_NA_all	Bacteria	Proteobacteria	Gammaproteobacteria	E01-9C-26 marine group
AD-107_O23_Cp_10.8_bact_LSW_2000m_NA_all	Bacteria	Proteobacteria	Gammaproteobacteria	E01-9C-26 marine group
AD-113_E02_Cp_8.5_bact_CDW_4000m_SI_all	Bacteria	Proteobacteria	Gammaproteobacteria	E01-9C-26 marine group
AD-113_J17_Cp_11.9_bact_CDW_4000m_SI_all	Bacteria	Proteobacteria	Gammaproteobacteria	E01-9C-26 marine group
AD-131_B03_Cp_9.7_bact_OMZ_750m_NA_all	Bacteria	Proteobacteria	Gammaproteobacteria	E01-9C-26 marine group
AD-131_C03_Cp_10.3_bact_OMZ_750m_NA_all	Bacteria	Proteobacteria	Gammaproteobacteria	E01-9C-26 marine group
AD-150_D03_Cp_11.7_bact_AAIW_1140m_SI_all	Bacteria	Proteobacteria	Gammaproteobacteria	E01-9C-26 marine group
AD-150_F11_Cp_12.9_bact_AAIW_1140m_SI_all	Bacteria	Proteobacteria	Gammaproteobacteria	E01-9C-26 marine group
AD-259_B03_Cp_7.3_bact_AABW_5000m_NA_all	Bacteria	Proteobacteria	Gammaproteobacteria	E01-9C-26 marine group
AD-259_N13_Cp_9.3_bact_AABW_5000m_NA_all	Bacteria	Proteobacteria	Gammaproteobacteria	E01-9C-26 marine group
AD-261_P20_Cp_12.7_bact_NADW_3200m_NA_all	Bacteria	Proteobacteria	Gammaproteobacteria	E01-9C-26 marine group
AD-263_A04_Cp_5.3_bact_LSW_1750m_NA_all	Bacteria	Proteobacteria	Gammaproteobacteria	E01-9C-26 marine group
AD-265_C10_Cp_7.3_bact_NSDW_1750m_NA_all	Bacteria	Proteobacteria	Gammaproteobacteria	E01-9C-26 marine group
AD-105_M09_Cp_9.3_bact_LSW_2000m_NA_all	Bacteria	Proteobacteria	Gammaproteobacteria	KI89A clade
AD-259_P03_Cp_11.4_bact_AABW_5000m_NA_all	Bacteria	Proteobacteria	Gammaproteobacteria	KI89A clade
AD-103_K20_Cp_11.2_bact_LDW_3100m_NA_all	Bacteria	Proteobacteria	Gammaproteobacteria	Chromatiales	Chromatiaceae	Unknown Chromatiaceae genus
AD-113_G03_Cp_6.8_bact_CDW_4000m_SI_all	Bacteria	Proteobacteria	Gammaproteobacteria	Salinisphaerales	Salinisphaeraceae	ZD0417 marine group
AD-129_M19_Cp_7.9_bact_NACW_300m_NA_all	Bacteria	Proteobacteria	Gammaproteobacteria	Salinisphaerales	Salinisphaeraceae	ZD0417 marine group
[truncated: 615 more rows]
